# Supplementary material for: Job burnout and turnover intention among Chinese primary healthcare staff: the mediating effect of satisfaction
Source: PubMed Central journal article supplement — BMJ Open. 2020 Oct 7;10(10):e036702. doi: 10.1136/bmjopen-2019-036702 (PMC7542935; doi:10.1136/bmjopen-2019-036702), 2020-10-07
Supplement: bmjopen-2019-036702.draft_revisions.pdf [file bmjopen-2019-036702.draft_revisions.pdf]

# BMJ Open

BMJ Open is committed to open peer review. As part of this commitment we make the peer review history of every article we publish publicly available.

When an article is published we post the peer reviewers' comments and the authors' responses online. We also post the versions of the paper that were used during peer review. These are the versions that the peer review comments apply to.

The versions of the paper that follow are the versions that were submitted during the peer review process. They are not the versions of record or the final published versions. They should not be cited or distributed as the published version of this manuscript.

BMJ Open is an open access journal and the full, final, typeset and author-corrected version of record of the manuscript is available on our site with no access controls, subscription charges or pay-per-view fees (<http://bmjopen.bmj.com>).

If you have any questions on BMJ Open's open peer review process please email [info.bmjopen@bmj.com](mailto:info.bmjopen@bmj.com)

# BMJ Open

## Job Burnout and Turnover Intention among Chinese Primary Healthcare Staff: The Mediating Effect of Satisfaction

|                               |                                                                                                                                                                                                                                                   |
|-------------------------------|---------------------------------------------------------------------------------------------------------------------------------------------------------------------------------------------------------------------------------------------------|
| Journal:                      | <i>BMJ Open</i>                                                                                                                                                                                                                                   |
| Manuscript ID                 | bmjopen-2019-036702                                                                                                                                                                                                                               |
| Article Type:                 | Original research                                                                                                                                                                                                                                 |
| Date Submitted by the Author: | 02-Jan-2020                                                                                                                                                                                                                                       |
| Complete List of Authors:     | Ran, Li; Wuhan University<br>Chen, Xuyu; Wuhan University<br>Peng, Shuzhen; Huangpi People's Hospital<br>Zheng, Feng; Health Committee of Huangpi District of Wuhan<br>Tan, Xiaodong; Wuhan University<br>Duan, Ruihua; Huangpi People's Hospital |
| Keywords:                     | Public health < INFECTIOUS DISEASES, Health & safety < HEALTH SERVICES ADMINISTRATION & MANAGEMENT, Human resource management < HEALTH SERVICES ADMINISTRATION & MANAGEMENT                                                                       |
|                               |                                                                                                                                                                                                                                                   |

SCHOLARONE™  
Manuscripts

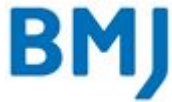

I, the Submitting Author has the right to grant and does grant on behalf of all authors of the Work (as defined in the below author licence), an exclusive licence and/or a non-exclusive licence for contributions from authors who are: i) UK Crown employees; ii) where BMJ has agreed a CC-BY licence shall apply, and/or iii) in accordance with the terms applicable for US Federal Government officers or employees acting as part of their official duties; on a worldwide, perpetual, irrevocable, royalty-free basis to BMJ Publishing Group Ltd ("BMJ") its licensees and where the relevant Journal is co-owned by BMJ to the co-owners of the Journal, to publish the Work in this journal and any other BMJ products and to exploit all rights, as set out in our [licence](#).

The Submitting Author accepts and understands that any supply made under these terms is made by BMJ to the Submitting Author unless you are acting as an employee on behalf of your employer or a postgraduate student of an affiliated institution which is paying any applicable article publishing charge ("APC") for Open Access articles. Where the Submitting Author wishes to make the Work available on an Open Access basis (and intends to pay the relevant APC), the terms of reuse of such Open Access shall be governed by a Creative Commons licence – details of these licences and which [Creative Commons](#) licence will apply to this Work are set out in our licence referred to above.

Other than as permitted in any relevant BMJ Author's Self Archiving Policies, I confirm this Work has not been accepted for publication elsewhere, is not being considered for publication elsewhere and does not duplicate material already published. I confirm all authors consent to publication of this Work and authorise the granting of this licence.

# Job Burnout and Turnover Intention among Chinese Primary Healthcare Staff: The Mediating Effect of Satisfaction

Li Ran<sup>1</sup>, Xuyu Chen<sup>1</sup>, Shuzhen Peng<sup>2</sup>, Feng Zheng<sup>3</sup>, Ruihua Duan<sup>2,#</sup>, and Xiaodong Tan

1,#

## Affiliations:

<sup>1</sup> Department of Occupational and Environmental Health, School of Health Sciences, Wuhan University, Wuhan, 430071, China; Email: [celesteyien@163.com](mailto:celesteyien@163.com) (Li Ran); [5827623310@163.com](mailto:5827623310@163.com) (Xuyu Chen);

<sup>2</sup> Huangpi People's Hospital, Wuhan, 432200, China; Email: [1718274898@qq.com](mailto:1718274898@qq.com) (Shuzhen Peng)

<sup>3</sup> Health Committee of Huangpi District of Wuhan, Wuhan, 430300, China; Email: [64184610@qq.com](mailto:64184610@qq.com) (Feng zheng)

## # Address correspondence to:

**Professor Xiaodong Tan, Ph.D.**

Department of Occupational and Environmental Health, School of Health Sciences, Wuhan University, 115 Donghu Road, Wuchang District, Wuhan, 430071, P. R. China.

Email: [whutanxiaodong@163.com](mailto:whutanxiaodong@163.com)

**Professor Ruihua Duan, Ph.D.**

Huangpi People's Hospital, 259 Baixiu Street, Huangpi District, Wuhan, 432200, P. R.

China. Email: [854757230@qq.com](mailto:854757230@qq.com)

## Abstract

**Objectives:** To explore the mediating effect of satisfaction and to understand the pathway through which job burnout influences turnover intention.

**Methods:** A multiple linear regression equation was established to test the relation between burnout and turnover intention in a cross-sectional study. Then, path analysis techniques with structural equation modeling were used to exam the mediating effect of satisfaction.

**Results:** Job burnout and education were positively associated with turnover intention, while age and monthly income were inversely associated with it. In path analysis, the direct path coefficient of burnout was 0.944, predicting 75.2% of the variance in turnover intentions. The indirect effect was -0.524, making up 21.5% of the total effect. The goodness-of-fit was acceptable ( $GFI = 0.936$ ,  $CFI = 0.969$ ,  $RMSEA = 0.072$ ,  $NNFI = 0.964$ ,  $IFI = 0.969$ ).

**Conclusion:** Job burnout and satisfaction are both crucial for primary healthcare staff, as they contribute to turnover intention.

**Keywords:** Burnout; Job Satisfaction; Turnover Intention; Mediating Effect; Healthcare

## Strengths and limitations of this study

- Linear regression was established to test factors associated with turnover intention.
- Path analysis was used to exam the relation among satisfaction, job burnout and turnover intention.
- Staff with lower monthly income, younger age and higher education are more likely to have turnover intention.
- Job burnout could directly affect turnover intention, while satisfaction works as a mediated variable.
- Inability to accurately discuss the representativeness of the cross-sectional study.

# 1 Background

Health and medical personnel play a seminal role in fulfilling the healthcare needs of the entire population, therefore, a robust allocation of human resources maintains the health system running smoothly and also guarantees people accessing to healthcare priority equally [1]. Unfortunately, the current out-of-balance between healthcare staff supply and demand has challenged this priority and triggered a global problem of continual brain drain. Up to 2013, the scarcity of healthcare workers (including physicians, nurses, and midwives) worldwide was estimated at 7.2 million, and it will sharply rising to 12.9 million by 2035 [2].

As a developing country with a huge population, China's shortage of doctors and nurses is worse. According to the *China health statistics yearbook*, there are only 0.46 pediatricians per 1,000 children, much lower than the staff allocation standard. Equally consistent is the finding that the number of anesthesiologists per 10,000 people is less than 0.65, although the total number reaches 76,000. There are about 3 million registered nurses in China, and the ratio of doctors and nurses is 1:1.4. A grossly inadequate amount of healthcare staff has become a social problem cannot be neglected, which is mainly caused by a growing turnover rate. Results of a survey show that the average turnover rate of nurses in first-class tertiary hospitals is 5.8 percent, which goes up to 8-10 percent in economically advanced regions like Shanghai and Guangzhou in China [3]. Under this circumstance, the turnover intention has been an important and popular study subject in psychology and management field.

Turnover intention reflects an individual's conscious and deliberate willfulness to quit one's job or organization within a certain time period, which would possibly pose a major problem in healthcare system resulting in a high turnover rate [4-6]. That is to say, the turnover intention is the strongest cognitive precursor of turnover, directly affecting the choice of departure. Because of a considerable number of predictive modeling formulas of voluntary turnover has been established, researchers generally recognized and supported that several hypothesized variables are associated with the

1  
2  
3  
4 intention to leave, involving commuting stress, emotional intelligence, job stress, job  
5  
6 burnout, and job satisfaction [7-10]. Among the hypothesized linkages above, job  
7  
8 burnout and satisfaction are the most common proposed antecedents.

9  
10 In the late 1980s, Pines and Aronson defined job burnout as a state of physical,  
11  
12 emotional and mental exhaustion [11,12]. Job burnout, in fact, describes the individuals'  
13  
14 psychological response to prolonged interpersonal and chronic emotional stressors,  
15  
16 dominantly caused by a long term involvement in emotionally demanding situations  
17  
18 [13]. Job burnout can be categorized into three dimensions, including emotional  
19  
20 exhaustion, depersonalization, and the sense of reduced personalized accomplishment.  
21  
22 Looking from the former researches, job burnout has a strong positive relationship with  
23  
24 turnover intention whereas a negative relation with job satisfaction [14,15]. Job  
25  
26 satisfaction encompasses employees' feelings and thoughts about various aspects of  
27  
28 their job. In other words, job satisfaction refers to an individual's cognitive or effective  
29  
30 evaluation of his or her occupational duties, presenting the extent people like the job  
31  
32 and reflecting the effective judgments people hold toward their work condition [16,17].  
33  
34 Numerous studies have repeatedly verified that job satisfaction is inversely related to  
35  
36 turnover and intent to leave. In addition to direct effects, we propose that job satisfaction  
37  
38 serves as the pathway through which job burnout affects turnover intention as well. Yet,  
39  
40 there is still a lack of literature supporting our hypothesis, hence, it is necessary to  
41  
42 conduct this study to make up the gap.

43  
44 Taken together, the theoretical framework utilized in this study originated from  
45  
46 researches suggesting that turnover intention maybe both related to satisfaction and  
47  
48 burnout toward the job. Accordingly, we hypothesized that:

49  
50 H1: Job burnout is positively related to turnover intention.

51  
52 H2: Job satisfaction is negatively related to turnover intention.

53  
54 H3: Job satisfaction is negatively related to job burnout.

55  
56 H4: Job satisfaction has a mediating effect between job burnout and turnover intention.

57  
58 As shown in Figure 1, we tested this theoretical model with the data from primary  
59  
60 healthcare staff in central China with the purpose of exploring the mediating effect of



1  
2  
3  
4 satisfaction and understanding the pathway through which job burnout influences  
5 turnover intention.  
6  
7  
8

## 9 10 **2 Methods**

### 11 12 13 **2.1 Design and Sample**

14  
15  
16  
17 In this investigation, we utilized survey research methods to make sense of the job  
18 burnout, satisfaction and turnover intention of primary healthcare staff. From March to  
19 May 2019, this study was conducted in Huangpi District of Wuhan in central China.  
20  
21 Huangpi District is an unwell developed economic rural area with 1.13 million  
22 population. Its medical resources and clinical ability represents the averaged level in  
23 China. All 1279 healthcare workers from 29 medical institutions were randomly  
24 recruited to participate in and fill out their own questionnaires for a 100% response rate.  
25  
26 The questionnaire consists of the following parts: sociodemographic information, job  
27 satisfaction, job burnout, and turnover intention.  
28  
29  
30  
31  
32  
33  
34  
35

### 36 **2.2 Methods of Measurement**

#### 37 38 39 **2.2.1 Job Satisfaction**

40  
41  
42  
43 On the bases of the local actual condition, we collected the job satisfaction  
44 information utilizing an adjusted satisfaction scale. The adjusted scale referred for the  
45 Minnesota Satisfaction Questionnaire (MSQ) [18], Job Satisfaction Survey (JSS) [19],  
46 and Job Descriptive Index (JDI) [20], including 14 items (item 1 to 14) about the  
47 satisfaction with the internal environment, external environment, remunerations,  
48 management, and work itself. Participants responded to a 5-point Likert scale ranging  
49 from 1 point (the most unsatisfaction) to 5 points (the most satisfaction). A higher score  
50 indicates a higher satisfaction.  
51  
52  
53  
54  
55  
56  
57  
58  
59  
60

### 2.2.2 Job Burnout

The information of participants' job burnout was gathered with an adjusted 5-point Likert burnout scale according to the Maslach Burnout Inventory-General Survey (MBI-GS) developed by Maslach and Jackson [21]. Several emotion-related items were used to describe participants' burnout experience, including "I'm interested in my job" (item 15, reverse coded), "I'm fit for this job" (item 16, reverse coded), "I think my work is challenging" (item 17), "My work is heavy" (item 18), "I think my work is meaningless" (item 19), "I can't find personal accomplishment in my job" (item 20), "I feel exhausted" (item 21), "I'm indifference of my job" (item 22), and "I feel anxious and fretful" (item 23). A higher score indicates a greater propensity of job burnout.

### 2.2.3 Turnover Intention

The turnover intention was similarly measured with an adjusted scale in regards to several plan-related items. The items in turnover intention include "I once thought to leave my current organization" (item 24), "It is likely that I shall seek a new job within the next year" (item 25), "I shall accept a new job if I have a chance" (item 26), "I consider that the employment situation is favorable" (item 27), and "I can find a good job" (item 28). Above items were evaluated with a 5-point Likert scale, where 1 represent strongly disagree, 2 represent disagree, 3 represent slightly disagree, 4 represent agree, and 5 represent strongly agree.

## 2.3 Statistical Analysis

All statistical analyses and hypothesis testing were performed using SPSS version 22.0 and AMOS version 21.0, with two-sided tests. In the first stage, an empirical study was processed to optimize items in each scale, including discrimination tests and collinearity diagnostics. Then, an exploratory factor analysis (EFA), confirmatory factor analysis (CFA) and a Crowns Bach coefficient method were applied to check the discriminant validity and reliability of above-mentioned scales. In the next stage, the

Pearson product-moment correlation coefficients were calculated to analyze the correlations between variables, while a multiple linear regression equation was further established to test the quantitative relation between burnout and turnover intention. Last, the effect of job burnout on turnover intention via satisfaction was examined using path analysis techniques within structural equation modeling (SEM) with maximum likelihood estimation. The goodness-of-fit of the model was evaluated with chi-square statistic, the goodness of fit index (GFI), the comparative fit index (CFI), the root mean square error of approximation (RMSEA), the non-normed fit index (NNFI), and the incremental fit index (IFI).

## 3 Results

### 3.1 Profile of Sample

Among all 1279 participants, the mean age, weekly working hours, and period of employment were respectively  $37.79 \pm 9.44$  years,  $47.50 \pm 27.25$  hours, and  $15.72 \pm 10.81$  years. Over half of the participants (66.50%) were female; 79.10% were married; 63% earned 2001-4000 Chinese Renminbi (RMB, US \$ 290.9699-581.649) per month. The most frequent occupational title was junior tile (accounting for 46.80%) and the most frequent education level were separately undergraduate degree (accounting for 45.20%) and junior college degree (accounting for 37.10%).

### 3.2 Tests of the Hypothetical Model

#### 3.2.1 Reliability and Validity Analysis

Before reliability analysis and validity analysis, we applied discrimination tests and collinearity diagnostics to filter optimal items. Although the adjusted satisfaction scale yields high indices of discrimination, there exists strong collinearity from item 1 to item 7, item 12 and item 13. After all comprehensive considerations, we deleted relative

1  
2  
3  
4 items except item 1. The Cronbach's  $\alpha$  of this scale reaches 0.956, indicating  
5 satisfactory reliability. Moreover, the modified scale construction  
6 is effective measuring by EFA (Kaiser-Meyer-Olkin = 0.928,  $P < 0.001$ ) and suitable  
7 for CFA. The model finally fit the data acceptably ( $\chi^2/df=21.883$ ,  $P < 0.001$ ,  $GFI =$   
8  $0.973$ ,  $CFI = 0.988$ ,  $RMSEA = 0.128$ ,  $NNFI = 0.987$ ,  $IFI = 0.988$ ).

9  
10  
11  
12  
13 In the adjusted burnout scale, we omitted the items from 15 to 17, 19 and 21 because  
14 of a low distinguishability in discriminant analysis. Cronbach's  $\alpha$  of this scale was  
15 increasing to 0.802. Besides, the adjusted burnout also has a good validity conducted  
16 by EFA and CFA ( $\chi^2/df=8.395$ ,  $P < 0.001$ ,  $GFI = 0.993$ ,  $CFI = 0.994$ ,  $RMSEA = 0.076$ ,  
17  $NNFI = 0.994$ ,  $IFI = 0.994$ ).

18  
19  
20  
21  
22  
23 Similar in the adjusted turnover intention scale, item 27 was removed. The  
24 Cronbach's  $\alpha$  coefficient for the remaining 4 items ( $\alpha = 0.865$ ) indicated good internal  
25 consistency reliability. And the validity is acceptable ( $\chi^2/df=29.072$ ,  $P < 0.001$ ,  $GFI$   
26  $= 0.980$ ,  $CFI = 0.979$ ,  $RMSEA = 0.148$ ,  $NNFI = 0.978$ ,  $IFI = 0.979$ ).

### 3.2.2 Correlation Analysis

27  
28  
29  
30  
31  
32  
33  
34  
35  
36  
37  
38  
39  
40  
41  
42  
43  
44  
45  
46  
47  
48  
49  
50  
51  
52  
53  
54  
55  
56  
57  
58  
59  
60  
Table 1 demonstrates the means, standard deviations, and correlation coefficients  
among three dimensions of job satisfaction, burnout, and turnover intention. As is  
indicated that job satisfaction has both a significant negative relation with turnover  
intention ( $r = -0.414$ ,  $P < 0.001$ ) and job burnout ( $r = -0.387$ ,  $P < 0.001$ ), verifying the  
hypothesis 2 and hypothesis 3. Job burnout showed a significant positive correlation  
with turnover intention ( $r = 0.797$ ,  $P < 0.001$ ) confirming the hypothesis 1.

Table 2 presents the results of multiple linear regression analyses between job  
burnout and turnover intention. The item of "anxious and fretful feeling" was found to  
have the strongest positive correlation to turnover intention ( $\beta=1.416$ ,  $P < 0.001$ ) in  
model 1. Except for it, "a heavy work", "no personal accomplishment", and  
"indifference" were positively related to turnover intention as well. From model 2 to  
model 4, we separately controlled the variable of age, education, and monthly income.  
As shown in model 5, adjusted all variables aforesaid, both age ( $\beta= -0.022$ ,  $P = 0.005$ )

and monthly income ( $\beta = -0.172$ ,  $P = 0.011$ ) were inversely associated with turnover intention, while education ( $\beta = 0.316$ ,  $P < 0.001$ ) was positively associated with it. The linear regression model is as follows:

$$\begin{aligned} \text{Turnover intention} = & 2.042 + 0.275 \times \text{heavy work} + 0.803 \\ & \times \text{no personal accomplishment} + 0.820 \times \text{indifference} + 1.365 \\ & \times \text{anxious and fretful} - 0.022 \times \text{age} + 0.316 \times \text{education} - 0.172 \times \\ & \times \text{monthly income} \end{aligned}$$

### 3.2.3 Path Analysis

Figure 2 presents the results of path analysis, in which two influencing factors have significant relationships with turnover intention, but the path coefficients are the opposite. Job burnout could directly affect turnover intention before introducing satisfaction as a mediated variable, whose path coefficient was significant ( $c = 0.991$ ,  $P < 0.001$ ) and the explanatory power was 79.0% ( $R^2 = \text{path coefficient} \times \text{correlation coefficient}$ ,  $0.991 \times 0.797 = 0.790$ ). The direct path coefficient of job satisfaction was -0.164 (b), predicting 27.7% ( $R^2 = -0.670 \times -0.414$ ) of the variance in turnover intentions.

After adding satisfaction as an intermediary variable factor, burnout's direct effect ( $c'$ ) on turnover decreased to 0.944 (C.R. = 34.304,  $P < 0.001$ ). The explanatory power was 75.2% ( $R^2 = 0.944 \times 0.797$ ) (Table 3 and Table 1). Identically, job burnout's direct affect satisfaction decreased to -0.315 (C.R. = -13.612,  $P < 0.001$ ). The mediating effect of satisfaction was significant ( $P < 0.001$ ) with the path coefficient of -0.524. The mediating effect makes up 21.5% of the total effect (proportion =  $a \times b/c$ ,  $0.318 \times 0.67/0.991 = 0.215$ ).

Showing in Figure 2, the hypothetical model yield satisfactory values ( $GFI = 0.936$ ,  $CFI = 0.969$ ,  $RMSEA = 0.072$ ,  $NNFI = 0.964$ ,  $IFI = 0.969$ ), indicating credible data fit.

## 4 Discussion

Along with the rapid economic growth, healthcare facilities and medical technology in China have achieved long-term progress. However, the development neither

1  
2  
3  
4 necessarily bring about the corresponding health insurance level, nor the high health  
5  
6 condition of Chinese citizens. Mainly attributed to an unbalanced regional economic  
7  
8 development, unequal right to health care security (or inequities in the allocation of  
9  
10 medical resources) occurs between advanced and poverty-stricken cities, as well as  
11  
12 urban and rural areas [22]. In terms of human resources, China's cities occupied 9.18  
13  
14 healthcare staff per 1,000 population, while 1.14 in rural [23]. Primary healthcare  
15  
16 institutions play an essential role in medical providing and safeguarding among the  
17  
18 broadest masses of people. In past decades, the medical quality and service standard in  
19  
20 primary medical institutions was continually enhanced with the in-depth development  
21  
22 of national medical and health system reform. But most of the basic healthcare staff still  
23  
24 encounter with low salary, less independence, and few promotion prospects, which  
25  
26 could lead to job burnout, unsatisfaction even turnover [24,25]. Our study was proposed  
27  
28 in Huangpi District, an under-development rural area in central China. As a  
29  
30 demonstration plot of health-management, Huangpi is famous for its new and unique  
31  
32 management model. Medical innovation and reform were performed since 2009, and it  
33  
34 has made great progress. Therefore, a study on job burnout and turnover intention  
35  
36 conducted here is noted concerned and generally presentative of China.

37  
38 Earlier researchers have recognized that job burnout positively predicted turnover  
39  
40 intention [26,27]. Our result corroborates previous studies, showing that job burnout, a  
41  
42 primary cause of turnover intention, strongly composes a positive correlation ( $r =$   
43  
44 0.797). Burnout's explanatory power to turnover reaches up to 79.0%. Regarding the  
45  
46 Pearson correlation analysis, although all of the four latent measures in job burnout are  
47  
48 positively and significantly associated with turnover intention, only "a heavy work"  
49  
50 shows a relatively weak correlation ( $r = 0.325$ ). The correlation coefficient of "no  
51  
52 personal accomplishment", "indifference", and "anxious and fretful" are respectively  
53  
54 0.679, 0.737, and 0.752. It's obvious that satisfaction is limited for its direct effect on  
55  
56 turnover intention, whose predictive power is 6.8% with a path coefficient of -0.164.  
57  
58 However, satisfaction's mediating effect on turnover intention is considerable. As it  
59  
60 turns out, job burnout leads to 79.0% turnover intention, 21.5% of which were affected  
through modulating satisfaction. This study confirms the partial mediating effect of

1  
2  
3  
4 satisfaction, indicating that it plays a crucial role between burnout and turnover. That  
5 is to say, more attention should be attached to both job burnout and satisfaction.  
6

7  
8 The turnover rate would be reduced through enhancing healthcare staff's satisfaction  
9 in some degree, involving raising income level, providing more advanced-learning  
10 opportunities, improving working condition, and enhancing benefits. In order to fully  
11 utilize health resources and to improve the healthcare system overall social impacts,  
12 governments and concerned departments should emphasize more attention to optimize  
13 medical resources allocation [28]. Under market economy conditions, public hospital  
14 managers should also establish and consummate hospital operation and management  
15 system. As an occupation with high risk, pressure, and skill, healthcare staffs deserve a  
16 high payment. However, some studies reveal that there is a huge income gap between  
17 Chinese medical staff and developed countries' [29]. The average monthly salary of  
18 Chinese health workers in 2017 was about 6669 RMB (approximately \$ 969.5428) [30].  
19 It is necessary to adopt a reasonable mechanism of performance incentive and  
20 financial management and to set up a good academic atmosphere at the same time.  
21 Through this way, employee's motivation and enthusiasm could be improved to some  
22 extent.  
23  
24  
25  
26  
27  
28  
29  
30  
31  
32  
33  
34  
35

36  
37 Apart from it, the turnover intention is noted to be affected by age, education and  
38 monthly income significantly. Along with the increasing of age and monthly income,  
39 the turnover intention presents a declining tendency (beta value for age and income are  
40 respectively -0.037 and -0.232). On the contrary, the turnover intention is increasing  
41 with education with the beta value of 0.342. This phenomenon further supports the  
42 above view and is consistent with the existing study [31]. In light of the above factors,  
43 more focuses need to raise on healthcare providers' psychological states, especially  
44 those youth with a high education background and academic qualification. Meanwhile,  
45 higher wages of healthcare workers cannot be overemphasized to retain talents.  
46  
47  
48  
49  
50  
51  
52  
53

54  
55 Although this study contributes to the knowledge base of the turnover intention  
56 related to job burnout and satisfaction, it does have several limitations. First, causal  
57 relationships among turnover, burnout, and satisfaction should be cautiously interpreted  
58 as this is a cross-sectional study. Future research calls for a longitudinal design to  
59  
60

confirm the causal relationships we found. Second, despite credible reliability and validity, the scales we used were adjusted based on the existing general scales. Hence, it needs to be tested and replicated with additional researches.

## 5 Conclusion

Preliminary findings suggest that job burnout directly contributes to turnover intention, or via the mediating effect of satisfaction. More attention should be paid to basic healthcare staff's burnout and satisfaction, especially those highly educated youth.

## Abbreviations

**MSQ:** Minnesota Satisfaction Questionnaire, **JSS:** Job Satisfaction Survey, **JDI:** Job Descriptive Index, **MBI-GS:** Maslach Burnout Inventory-General Survey, **EFA:** exploratory factor analysis, **CFA:** confirmatory factor analysis, **SEM:** structural equation modeling, **GFI:** the goodness of fit index, **CFI:** the comparative fit index, **RMSEA:** the root mean square error of approximation, **NNFI:** the non-normed fit index, **IFI:** the incremental fit index.

## Figure legends

Figure 1. Hypothesized model of burnout, satisfaction, and turnover intention

Figure 2. Path diagram for the hypothetical model

## Acknowledgements

Here we are thankful to all the healthcare staff participated in this study. We are also grateful to all the investigators for collecting and calculating data.



## Contributors

Conceived and designed this evaluation: Li Ran and Xuyu Chen. Wrote this paper: Li Ran. Calculated data: Li Ran, Xuyu Chen, Shuzhen Peng, and Feng Zheng. Performed the study and collected data: Xuyu Chen and Li Ran. Provided with analysis tools: Professor Xiaodong Tan. Mended and approved the final version: Professor Xiaodong Tan and Ruihua Duan. Li Ran and Xuyu Chen contributed equally to this paper.

## Funding

This research did not receive any specific grant from funding agencies in the public, commercial, or not-for-profit sectors.

## Competing interests

None declared.

## Patient and public involvement statement

No patient involved.

## Patient consent for publication

Not required.

## Data sharing statement

Data will be provided if necessary.

**References:**

- [1] D. Feng, S. Su, Y. Yang, J. Xia, Y. Su, "Job satisfaction mediates subjective social status and turnover intention among Chinese nurses," *Nursing & Health Sciences*, vol. 19, no. 3, pp. 388, 2017.
- [2] M. Marć, A. Bartosiewicz, J. Burzyńska, Z. Chmiel, P. Januszewicz, "A nursing shortage – a prospect of global and local policies," *INTERNATIONAL NURSING REVIEW*, vol. 66, no. 1, pp. 9-16, 2019.
- [3] Q. Du, Y. Li, Z. Shi, "Application of performance management in the nurses overall quality of quantitative management," *Chinese Journal of Modern Nursing*, vol. 19, no. 27, pp. 3407-3409, 2013.
- [4] J. P. Meyer and N. J. Allen, "A Three-Component Model Conceptualization of Organizational Commitment," *HUMAN RESOURCE MANAGEMENT REVIEW*, vol. 78, no. 1, pp. 61-89, 2016.
- [5] Y. H. Lee and P. Chelladurai, "Emotional intelligence, emotional labor, coach burnout, job satisfaction, and turnover intention in sport leadership," *European Sport Management Quarterly*, vol. 18, no. 4, pp. 393-412, 2018.
- [6] A. Sousa-Poza and F. Henneberger, "Analyzing Job Mobility with Job Turnover Intentions: An International Comparative Study," *JOURNAL OF ECONOMIC ISSUES*, vol. 38, no. 1, pp. 113-137, 2004.
- [7] K. Amponsah-Tawiah, F. Annor, B. G. Arthur, "Linking commuting stress to job satisfaction and turnover intention: The mediating role of burnout," *Journal of Workplace Behavioral Health*, vol. 31, no. 2, pp. 104-123, 2016.
- [8] L. F. Yang, J. Y. Liu, Y. H. Liu, "Job burnout and turnover intention among nurses in China: the mediating effects of positive emotion," *Chinese Nursing Research*, vol. 5, no. 1, pp. 43-47, 2018.
- [9] E. Hong and Y. S. Lee, "The mediating effect of emotional intelligence between emotional labour, job stress, burnout and nurses' turnover intention," *International Journal of Nursing Practice*, vol. 22, no. 6, pp. 625-632, 2016.
- [10] H. L. Ye and P. Chelladurai, "Emotional intelligence, emotional labor, coach burnout, job satisfaction, and turnover intention in sport leadership," *European Sport Management Quarterly*, vol., pp. 1-20, 2017.
- [11] A. Pavlakis, V. Raftopoulos, M. Theodorou, "Burnout syndrome in Cypriot physiotherapists: a national survey," *BMC HEALTH SERVICES RESEARCH*, vol. 10, no. 1, pp. 1-8, 2010.
- [12] A. M. Pines, "Marriage burnout: A new conceptual framework for working with couples.," *Psychotherapy in Private Practice*, vol. 5, no. 2, pp. 31-44, 1987.
- [13] H. Kroll, T. Macaulay, M. Jesse, "A preliminary survey examining predictors of burnout in pain medicine physicians in the United States," *Pain Physician*, vol. 19, no. 5, pp. E689, 2016.
- [14] C. A. Wong and H. K. S. Laschinger, "The Influence of Frontline Manager Job Strain on Burnout, Commitment and Turnover Intention: A Cross-sectional Study," *INTERNATIONAL JOURNAL OF NURSING STUDIES*, vol. 52, no. 12, pp. 1824-1833, 2015.
- [15] A. C. C. Lu and D. Gursoy, "Impact of Job Burnout on Satisfaction and Turnover Intention: Do Generational Differences Matter?" *Journal of Hospitality & Tourism Research*, vol. 40, no. 2, pp. 210-235, 2016.

- 1  
2  
3  
4 [16] H. Samadi Miarkolaei and H. Samadi Miarkolaei, "An investigation on relationship between  
5 employees' job satisfaction and organizational commitment," *Management Science Letters*,  
6 vol. 4, no. 4, pp. 669-678, 2014.
- 7 [17] T. Aldrees, S. Al-Eissa, M. Badri, A. Aljuhayman, M. Zamakhshary, "Physician job  
8 satisfaction in Saudi Arabia: insights from a tertiary hospital survey," *ANNALS OF SAUDI*  
9 *MEDICINE*, vol. 35, no. 3, pp. 210, 2015.
- 10 [18] D. J. Weiss, R. V. Dawis, G. W. England, "Manual for the Minnesota Satisfaction Question,"  
11 *Minnesota Studies in Vocational Rehabilitation*, vol. 22, pp.1967.
- 12 [19] T. Andreas and S. Pavlos, "Validity and reliability of the Greek translation of the Job  
13 Satisfaction Survey (JSS)," *Bmc Psychology*, vol. 6, no. 1, pp. 27, 2018.
- 14 [20] S. Lopes, M. J. Chambel, F. Castanheira, F. Oliveira-Cruz, "Measuring job satisfaction in  
15 Portuguese military sergeants and officers: Validation of the Job Descriptive Index and the Job  
16 in General scale.," *MILITARY PSYCHOLOGY*, vol. 27, no. 1, pp. 52-63, 2015.
- 17 [21] N. Schutte, S. Toppinen, R. Kalimo, W. Schaufeli, "The factorial validity of the Maslach  
18 Burnout Inventory - General Survey (MBI - GS) across occupational groups and nations,"  
19 *Journal of Occupational & Organizational Psychology*, vol. 73, no. 1, pp. 53-66, 2011.
- 20 [22] J. Wang, "The Problem of Uneven Allocation of Medical Resources in Urban and Rural Areas,"  
21 *Journal of Tangshan Teachers College*, vol. 33, no. 6, pp. 108-110, 2011.
- 22 [23] H. Wang, C. Tang, S. Zhao, Q. Meng, J. Y. Liu, "Job Satisfaction among Health-Care Staff in  
23 Township Health Centers in Rural China: Results from a Latent Class Analysis," *International*  
24 *Journal of Environmental Research & Public Health*, vol. 14, no. 10, pp. 1101, 2017.
- 25 [24] X. D. Zhou, L. Li, T. Hesketh, "Health system reform in rural China: Voices of healthworkers  
26 and service-users," *SOCIAL SCIENCE & MEDICINE*, vol. 117, no. 1982, pp. 134-141, 2014.
- 27 [25] H. Li and G. Y. Yin, "Discussion on the human resource management of public hospitals under  
28 the implementation of the new medical reform," *China Medical Herald*, vol. 9, no. 5, pp. 161-  
29 163, 2012.
- 30 [26] L. F. Yang, J. Y. Liu, Y. H. Liu, "Job burnout and turnover intention among nurses in China:the  
31 mediating effects of positive emotion," *Chinese Nursing Research*, vol. 5, no. 1, pp. 43-47,  
32 2018.
- 33 [27] K. Amponsah-Tawiah, F. Annor, B. G. Arthur, "Linking commuting stress to job satisfaction  
34 and turnover intention: The mediating role of burnout," *Journal of Workplace Behavioral*  
35 *Health*, vol. 31, no. 2, pp. 104-123, 2016.
- 36 [28] E. Yaylali, P. G. Farnham, K. L. Schneider, et al, "From Theory to Practice: Implementation  
37 of a Resource Allocation Model in Health Departments," *Journal of Public Health*  
38 *Management & Practice Jphmp*, vol. 22, no. 6, pp. 567, 2016.
- 39 [29] J. Li, R. H. Feng, Y. Cui, M. Li, Y. Mao, X. Wang, "Comparison and Enlightenment on Health  
40 Staff , Income in Typical Countries under Different Economic Development," *Chinese*  
41 *Health Economics*, vol. 32, no. 1, pp. 91-93, 2013.
- 42 [30] J. You, "Research on the Current Situation and Improvement Strategy of Medical Personnel  
43 Salary Level in China," *Chinese Health Economics*, vol. 37, no. 8, pp. 17-21, 2018.
- 44 [31] W. H. Du, "The correlation research among work satisfaction, job burnout and turnover  
45 intention of medical stuff from certain class three grade A hospital in Jilin Province," pp.2018.
- 46  
47  
48  
49  
50  
51  
52  
53  
54  
55  
56  
57  
58  
59  
60

|                           | <b>M</b>     | <b>SD</b>    | <b>Job satisfaction</b> | <b>Job Burnout</b> | <b>Turnover Intention</b> |
|---------------------------|--------------|--------------|-------------------------|--------------------|---------------------------|
| <b>Job Satisfaction</b>   | <b>23.06</b> | <b>5.377</b> | <b>1.000</b>            | <b>-0.387</b>      | <b>-0.414</b>             |
| item 1                    | 4.08         | 0.921        | 0.882                   | -0.298             | -0.299                    |
| item 8                    | 3.63         | 1.093        | 0.902                   | -0.356             | -0.401                    |
| item 9                    | 3.84         | 0.963        | 0.911                   | -0.370             | -0.403                    |
| item 10                   | 3.89         | 0.960        | 0.889                   | -0.342             | -0.366                    |
| item 11                   | 3.71         | 1.046        | 0.917                   | -0.350             | -0.393                    |
| item 14                   | 3.91         | 0.941        | 0.908                   | -0.386             | -0.384                    |
| <b>Job Burnout</b>        | <b>10.87</b> | <b>4.392</b> | <b>-0.387</b>           | <b>1.000</b>       | <b>0.797</b>              |
| item 18                   | 3.42         | 1.008        | -0.134                  | 0.365              | 0.325                     |
| item 20                   | 2.10         | 0.990        | -0.319                  | 0.889              | 0.679                     |
| item 22                   | 2.02         | 0.996        | -0.352                  | 0.911              | 0.737                     |
| item 23                   | 2.16         | 1.006        | -0.373                  | 0.884              | 0.752                     |
| <b>Turnover Intention</b> | <b>8.97</b>  | <b>3.614</b> | <b>-0.406</b>           | <b>0.797</b>       | <b>1.000</b>              |
| item 24                   | 2.24         | 1.104        | -0.430                  | 0.765              | 0.881                     |
| item 25                   | 1.86         | 0.869        | -0.297                  | 0.763              | 0.841                     |
| item 26                   | 2.45         | 1.207        | -0.403                  | 0.652              | 0.881                     |
| item 28                   | 2.43         | 1.076        | -0.231                  | 0.543              | 0.788                     |

Notes:  $P < 0.01$ . M= mean value; SD=standard deviation

Table 1. Pearson correlation among job satisfaction, burnout and turnover intention of primary healthcare workers

1  
2  
3  
4  
5  
6  
7  
8  
9  
10  
11  
12  
13  
14  
15  
16  
17  
18  
19  
20  
21  
22  
23  
24  
25  
26  
27

|                | Model 1                                 |       |          |          | Model 2                                 |       |          |          | Model 3                                 |       |          |          | Model 4                                 |       |          |          | Model 5                                 |       |          |          |
|----------------|-----------------------------------------|-------|----------|----------|-----------------------------------------|-------|----------|----------|-----------------------------------------|-------|----------|----------|-----------------------------------------|-------|----------|----------|-----------------------------------------|-------|----------|----------|
|                | $\beta$                                 | SE    | <i>t</i> | <i>P</i> |
| Con            | 1.631                                   | 0.231 | 7.052    | <0.001   | 3.109                                   | 0.345 | 9.023    | <0.001   | 0.609                                   | 0.326 | 1.866    | 0.062    | 2.284                                   | 0.282 | 8.11     | <0.001   | 2.042                                   | 0.454 | 4.499    | <0.001   |
| HW             | 0.284                                   | 0.064 | 4.432    | <0.001   | 0.289                                   | 0.063 | 4.576    | <0.001   | 0.250                                   | 0.064 | 3.904    | <0.001   | 0.309                                   | 0.064 | 4.837    | <0.001   | 0.275                                   | 0.064 | 4.326    | <0.001   |
| NPA            | 0.756                                   | 0.098 | 7.684    | <0.001   | 0.792                                   | 0.097 | 8.134    | <0.001   | 0.785                                   | 0.098 | 8.017    | <0.001   | 0.755                                   | 0.098 | 7.718    | <0.001   | 0.803                                   | 0.097 | 8.281    | <0.001   |
| Ind            | 0.856                                   | 0.121 | 7.083    | <0.001   | 0.806                                   | 0.120 | 6.735    | <0.001   | 0.858                                   | 0.120 | 7.152    | <0.001   | <0.001                                  | 0.120 | 7.033    | <0.001   | 0.820                                   | 0.119 | 6.893    | <0.001   |
| AF             | 1.416                                   | 0.105 | 13.434   | <0.001   | 1.383                                   | 0.104 | 13.265   | <0.001   | 1.385                                   | 0.105 | 13.213   | <0.001   | 1.411                                   | 0.105 | 13.465   | <0.001   | 1.365                                   | 0.104 | 13.148   | <0.001   |
| Age            | --                                      | --    | --       | --       | -0.037                                  | 0.006 | -5.730   | <0.001   | --                                      | --    | --       | --       | --                                      | --    | --       | --       | -0.022                                  | 0.008 | -2.810   | 0.005    |
| Edu            | --                                      | --    | --       | --       | --                                      | --    | --       | --       | 0.342                                   | 0.078 | 4.407    | <0.001   | --                                      | --    | --       | --       | 0.316                                   | 0.082 | 3.841    | <0.001   |
| MI             | --                                      | --    | --       | --       | --                                      | --    | --       | --       | --                                      | --    | --       | --       | -0.232                                  | 0.058 | -4.015   | <0.001   | -0.172                                  | 0.068 | -2.534   | 0.011    |
| R <sup>2</sup> | 0.636 (adjusted R <sup>2</sup> = 0.635) |       |          |          | 0.645 (adjusted R <sup>2</sup> = 0.644) |       |          |          | 0.642 (adjusted R <sup>2</sup> = 0.640) |       |          |          | 0.641 (adjusted R <sup>2</sup> = 0.639) |       |          |          | 0.650 (adjusted R <sup>2</sup> = 0.648) |       |          |          |
| F              | 557.327 ( <i>P</i> < 0.001)             |       |          |          | 463.567 ( <i>P</i> < 0.001)             |       |          |          | 456.191 ( <i>P</i> < 0.001)             |       |          |          | 454.377 ( <i>P</i> < 0.001)             |       |          |          | 337.435 ( <i>P</i> < 0.001)             |       |          |          |

Notes: Con-constant, HW-a heavy work, NPA-no personal accomplishment, Ind-indifference, AF-anxious and fretful, Edu-education, MI-monthly income  
 Model 2-adjust for age, Model 3-adjust for education, Model 4-adjust for monthly income, Model 5- adjust for variables above

Table 2. Multiple linear regression examining factors associated with turnover intention

45  
46

| Endogenous variables | Exogenous variables | Estimate | C.R.    | Direct effect ( <i>P</i> ) | Indirect effect ( <i>P</i> ) | Total effect ( <i>P</i> ) |
|----------------------|---------------------|----------|---------|----------------------------|------------------------------|---------------------------|
| Turnover intention   | Burnout             | 0.944    | 34.304  | 0.944 (< 0.001)            | 0.052 (< 0.001)              | 0.996 (< 0.001)           |
|                      | Satisfaction        | -0.164   | -6.002  | -0.164 (< 0.001)           | —                            | -0.164 (< 0.001)          |
| Satisfaction         | Burnout             | -0.315   | -13.612 | -0.315 (< 0.001)           | —                            | -0.315 (< 0.001)          |

Notes: C.R.- critical ratio

Table 3. The effects in the hypothetical model

1  
2  
3  
4  
5  
6  
7  
8  
9  
10  
11  
12  
13  
14  
15  
16  
17  
18  
19  
20  
21  
22  
23  
24  
25  
26  
27  
28  
29  
30  
31  
32  
33  
34  
35  
36  
37  
38  
39  
40  
41  
42  
43  
44  
45  
46  
47  
48  
49  
50  
51  
52  
53  
54  
55  
56  
57  
58  
59  
60

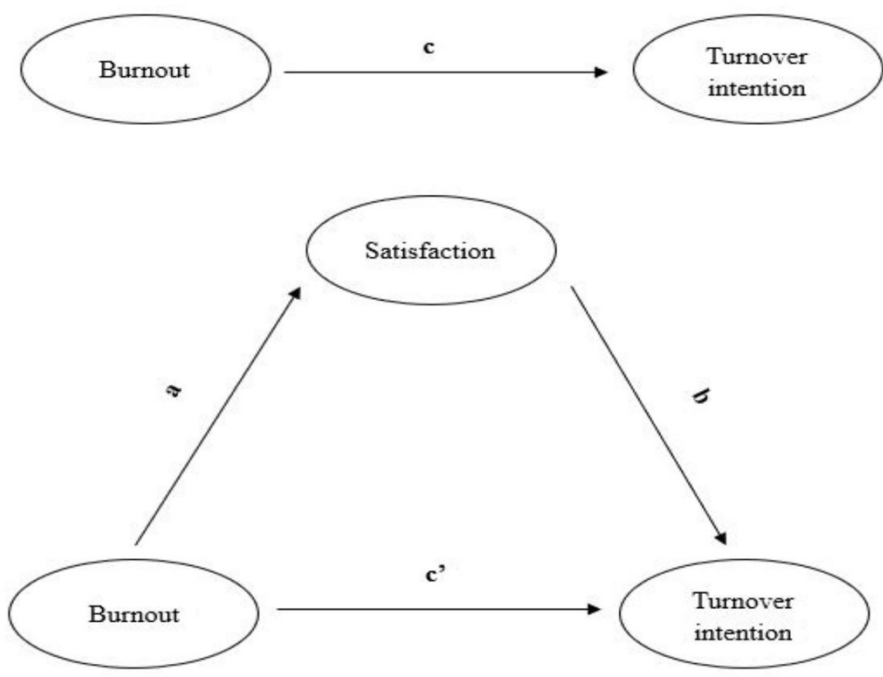

Figure 1. Hypothesized model of burnout, satisfaction, and turnover intention

264x190mm (300 x 300 DPI)

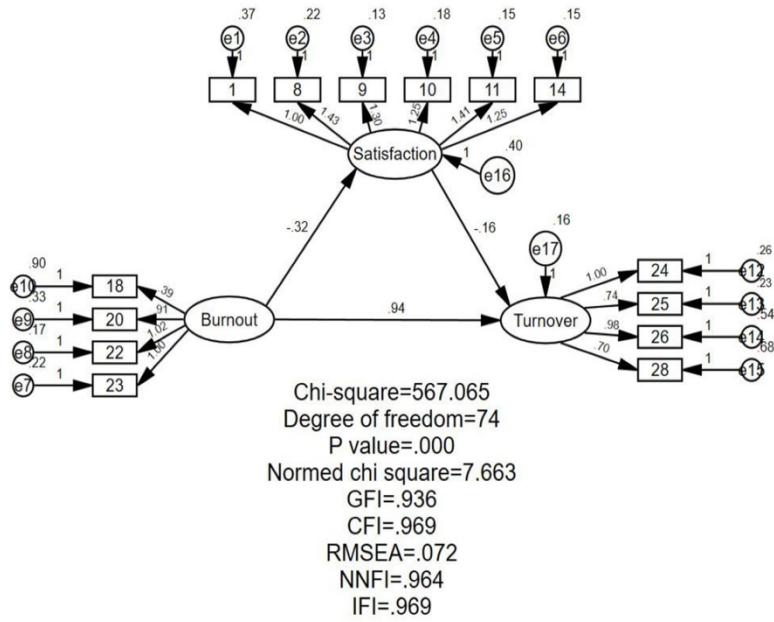

Figure 2. Path diagram for the hypothetical model

264x190mm (300 x 300 DPI)



## STROBE Statement—checklist of items that should be included in reports of observational studies

|                              | Item No | Recommendation                                                                                                                                                                                                                                                                                                                                                                                                                                                         | Page No |
|------------------------------|---------|------------------------------------------------------------------------------------------------------------------------------------------------------------------------------------------------------------------------------------------------------------------------------------------------------------------------------------------------------------------------------------------------------------------------------------------------------------------------|---------|
| <b>Title and abstract</b>    | 1       | (a) Indicate the study's design with a commonly used term in the title or the abstract                                                                                                                                                                                                                                                                                                                                                                                 | 2       |
|                              |         | (b) Provide in the abstract an informative and balanced summary of what was done and what was found                                                                                                                                                                                                                                                                                                                                                                    | 2       |
| <b>Introduction</b>          |         |                                                                                                                                                                                                                                                                                                                                                                                                                                                                        |         |
| Background/rationale         | 2       | Explain the scientific background and rationale for the investigation being reported                                                                                                                                                                                                                                                                                                                                                                                   | 4-6     |
| Objectives                   | 3       | State specific objectives, including any prespecified hypotheses                                                                                                                                                                                                                                                                                                                                                                                                       | 5       |
| <b>Methods</b>               |         |                                                                                                                                                                                                                                                                                                                                                                                                                                                                        |         |
| Study design                 | 4       | Present key elements of study design early in the paper                                                                                                                                                                                                                                                                                                                                                                                                                | 6       |
| Setting                      | 5       | Describe the setting, locations, and relevant dates, including periods of recruitment, exposure, follow-up, and data collection                                                                                                                                                                                                                                                                                                                                        | 6       |
| Participants                 | 6       | (a) <i>Cohort study</i> —Give the eligibility criteria, and the sources and methods of selection of participants. Describe methods of follow-up<br><i>Case-control study</i> —Give the eligibility criteria, and the sources and methods of case ascertainment and control selection. Give the rationale for the choice of cases and controls<br><i>Cross-sectional study</i> —Give the eligibility criteria, and the sources and methods of selection of participants | 6       |
|                              |         | (b) <i>Cohort study</i> —For matched studies, give matching criteria and number of exposed and unexposed<br><i>Case-control study</i> —For matched studies, give matching criteria and the number of controls per case                                                                                                                                                                                                                                                 | N/A     |
| Variables                    | 7       | Clearly define all outcomes, exposures, predictors, potential confounders, and effect modifiers. Give diagnostic criteria, if applicable                                                                                                                                                                                                                                                                                                                               | 6-7     |
| Data sources/<br>measurement | 8*      | For each variable of interest, give sources of data and details of methods of assessment (measurement). Describe comparability of assessment methods if there is more than one group                                                                                                                                                                                                                                                                                   | 6-7     |
| Bias                         | 9       | Describe any efforts to address potential sources of bias                                                                                                                                                                                                                                                                                                                                                                                                              | N/A     |
| Study size                   | 10      | Explain how the study size was arrived at                                                                                                                                                                                                                                                                                                                                                                                                                              | N/A     |
| Quantitative variables       | 11      | Explain how quantitative variables were handled in the analyses. If applicable, describe which groupings were chosen and why                                                                                                                                                                                                                                                                                                                                           | N/A     |
| Statistical methods          | 12      | (a) Describe all statistical methods, including those used to control for confounding                                                                                                                                                                                                                                                                                                                                                                                  | 7-8     |
|                              |         | (b) Describe any methods used to examine subgroups and interactions                                                                                                                                                                                                                                                                                                                                                                                                    | 7-8     |
|                              |         | (c) Explain how missing data were addressed                                                                                                                                                                                                                                                                                                                                                                                                                            | N/A     |
|                              |         | (d) <i>Cohort study</i> —If applicable, explain how loss to follow-up was addressed<br><i>Case-control study</i> —If applicable, explain how matching of cases and controls was addressed<br><i>Cross-sectional study</i> —If applicable, describe analytical methods taking account of sampling strategy                                                                                                                                                              | N/A     |
|                              |         | (e) Describe any sensitivity analyses                                                                                                                                                                                                                                                                                                                                                                                                                                  | N/A     |

Continued on next page

| <b>Results</b>           |     |                                                                                                                                                                                                              |      |
|--------------------------|-----|--------------------------------------------------------------------------------------------------------------------------------------------------------------------------------------------------------------|------|
| Participants             | 13* | (a) Report numbers of individuals at each stage of study—eg numbers potentially eligible, examined for eligibility, confirmed eligible, included in the study, completing follow-up, and analysed            | 6, 8 |
|                          |     | (b) Give reasons for non-participation at each stage                                                                                                                                                         | N/A  |
|                          |     | (c) Consider use of a flow diagram                                                                                                                                                                           |      |
| Descriptive data         | 14* | (a) Give characteristics of study participants (eg demographic, clinical, social) and information on exposures and potential confounders                                                                     | 8    |
|                          |     | (b) Indicate number of participants with missing data for each variable of interest                                                                                                                          | N/A  |
|                          |     | (c) <i>Cohort study</i> —Summarise follow-up time (eg, average and total amount)                                                                                                                             | N/A  |
| Outcome data             | 15* | <i>Cohort study</i> —Report numbers of outcome events or summary measures over time                                                                                                                          | N/A  |
|                          |     | <i>Case-control study</i> —Report numbers in each exposure category, or summary measures of exposure                                                                                                         | N/A  |
|                          |     | <i>Cross-sectional study</i> —Report numbers of outcome events or summary measures                                                                                                                           | 8    |
| Main results             | 16  | (a) Give unadjusted estimates and, if applicable, confounder-adjusted estimates and their precision (eg, 95% confidence interval). Make clear which confounders were adjusted for and why they were included | 9    |
|                          |     | (b) Report category boundaries when continuous variables were categorized                                                                                                                                    | N/A  |
|                          |     | (c) If relevant, consider translating estimates of relative risk into absolute risk for a meaningful time period                                                                                             | N/A  |
| Other analyses           | 17  | Report other analyses done—eg analyses of subgroups and interactions, and sensitivity analyses                                                                                                               | N/A  |
| <b>Discussion</b>        |     |                                                                                                                                                                                                              |      |
| Key results              | 18  | Summarise key results with reference to study objectives                                                                                                                                                     | 8-10 |
| Limitations              | 19  | Discuss limitations of the study, taking into account sources of potential bias or imprecision. Discuss both direction and magnitude of any potential bias                                                   | 12   |
| Interpretation           | 20  | Give a cautious overall interpretation of results considering objectives, limitations, multiplicity of analyses, results from similar studies, and other relevant evidence                                   | 12   |
| Generalisability         | 21  | Discuss the generalisability (external validity) of the study results                                                                                                                                        | 11   |
| <b>Other information</b> |     |                                                                                                                                                                                                              |      |
| Funding                  | 22  | Give the source of funding and the role of the funders for the present study and, if applicable, for the original study on which the present article is based                                                | N/A  |

\*Give information separately for cases and controls in case-control studies and, if applicable, for exposed and unexposed groups in cohort and cross-sectional studies.

**Note:** An Explanation and Elaboration article discusses each checklist item and gives methodological background and published examples of transparent reporting. The STROBE checklist is best used in conjunction with this article (freely available on the Web sites of PLoS Medicine at <http://www.plosmedicine.org/>, Annals of Internal Medicine at <http://www.annals.org/>, and Epidemiology at <http://www.epidem.com/>). Information on the STROBE Initiative is available at [www.strobe-statement.org](http://www.strobe-statement.org).

# BMJ Open

## Job Burnout and Turnover Intention among Chinese Primary Healthcare Staff: The Mediating Effect of Satisfaction

|                                 |                                                                                                                                                                                                                                                   |
|---------------------------------|---------------------------------------------------------------------------------------------------------------------------------------------------------------------------------------------------------------------------------------------------|
| Journal:                        | <i>BMJ Open</i>                                                                                                                                                                                                                                   |
| Manuscript ID                   | bmjopen-2019-036702.R1                                                                                                                                                                                                                            |
| Article Type:                   | Original research                                                                                                                                                                                                                                 |
| Date Submitted by the Author:   | 26-May-2020                                                                                                                                                                                                                                       |
| Complete List of Authors:       | Ran, Li; Wuhan University<br>Chen, Xuyu; Wuhan University<br>Peng, Shuzhen; Huangpi People's Hospital<br>Zheng, Feng; Health Committee of Huangpi District of Wuhan<br>Tan, Xiaodong; Wuhan University<br>Duan, Ruihua; Huangpi People's Hospital |
| <b>Primary Subject Heading</b>: | Health services research                                                                                                                                                                                                                          |
| Secondary Subject Heading:      | Health services research, Occupational and environmental medicine, Public health                                                                                                                                                                  |
| Keywords:                       | Public health < INFECTIOUS DISEASES, Health & safety < HEALTH SERVICES ADMINISTRATION & MANAGEMENT, Human resource management < HEALTH SERVICES ADMINISTRATION & MANAGEMENT                                                                       |
|                                 |                                                                                                                                                                                                                                                   |

SCHOLARONE™  
Manuscripts



I, the Submitting Author has the right to grant and does grant on behalf of all authors of the Work (as defined in the below author licence), an exclusive licence and/or a non-exclusive licence for contributions from authors who are: i) UK Crown employees; ii) where BMJ has agreed a CC-BY licence shall apply, and/or iii) in accordance with the terms applicable for US Federal Government officers or employees acting as part of their official duties; on a worldwide, perpetual, irrevocable, royalty-free basis to BMJ Publishing Group Ltd ("BMJ") its licensees and where the relevant Journal is co-owned by BMJ to the co-owners of the Journal, to publish the Work in this journal and any other BMJ products and to exploit all rights, as set out in our [licence](#).

The Submitting Author accepts and understands that any supply made under these terms is made by BMJ to the Submitting Author unless you are acting as an employee on behalf of your employer or a postgraduate student of an affiliated institution which is paying any applicable article publishing charge ("APC") for Open Access articles. Where the Submitting Author wishes to make the Work available on an Open Access basis (and intends to pay the relevant APC), the terms of reuse of such Open Access shall be governed by a Creative Commons licence – details of these licences and which [Creative Commons](#) licence will apply to this Work are set out in our licence referred to above.

Other than as permitted in any relevant BMJ Author's Self Archiving Policies, I confirm this Work has not been accepted for publication elsewhere, is not being considered for publication elsewhere and does not duplicate material already published. I confirm all authors consent to publication of this Work and authorise the granting of this licence.

# Job Burnout and Turnover Intention among Chinese Primary Healthcare Staff: The Mediating Effect of Satisfaction

Li Ran<sup>1\*</sup>, Xuyu Chen<sup>1\*</sup>, Shuzhen Peng<sup>2</sup>, Feng Zheng<sup>3</sup>, Xiaodong Tan <sup>1#</sup>, and Ruihua  
Duan<sup>2#</sup>

## Affiliations:

<sup>1</sup> Department of Occupational and Environmental Health, School of Health Sciences, Wuhan University, Wuhan, 430071, China; Email: [celesteyien@163.com](mailto:celesteyien@163.com) (Li Ran); [5827623310@163.com](mailto:5827623310@163.com) (Xuyu Chen)

<sup>2</sup> Huangpi People's Hospital, Wuhan, 432200, China; Email: [1718274898@qq.com](mailto:1718274898@qq.com) (Shuzhen Peng)

<sup>3</sup> Health Committee of Huangpi District of Wuhan, Wuhan, 430300, China; Email: [694184610@qq.com](mailto:694184610@qq.com) (Feng Zheng)

\*These authors contributed equally to this paper.

# Address correspondence to:

**Professor Xiaodong Tan, Ph.D.**

Department of Occupational and Environmental Health, School of Health Sciences, Wuhan University, 115 Donghu Road, Wuchang District, Wuhan, 430071, P. R. China.

Email: [whutanxiaodong@163.com](mailto:whutanxiaodong@163.com)

**Professor Ruihua Duan, Ph.D.**

Huangpi People's Hospital, 259 Baixiu Street, Huangpi District, Wuhan, 432200, P. R.

China. Email: [854757230@qq.com](mailto:854757230@qq.com)

## Abstract

**Objectives:** Although China has done a lot in strengthening the primary healthcare system, the high turnover intention is still a social problem to be reckoned with. The objective of this study is to explore the mediating effect of satisfaction between job burnout and turnover intention.

**Design:** Cross-sectional study.

1  
2  
3 **Methods:** A cross-sectional study was conducted to make sense of the job burnout,  
4 satisfaction, and turnover intention among primary healthcare workers in central China.  
5 Structural equation modeling (SEM) was performed to study the mediating effect of  
6 satisfaction between job burnout and turnover intention with maximum likelihood  
7 estimation. The mediation effect test was carried out by using the bootstrap method.  
8  
9

10  
11 **Results:** SEM showed that job burnout was positively related to the turnover intention  
12 with the standard path coefficient of 0.857 (C.R. = 34.304,  $P < 0.001$ ). The partial  
13 mediating effect of satisfaction was 0.047, making up 5.20% of the total effect. The  
14 goodness-of-fit was acceptable ( $GFI = 0.936$ ,  $CFI = 0.969$ ,  $RMSEA = 0.072$ ,  $NNFI =$   
15  $0.964$ ,  $IFI = 0.969$ ). Age, education level, monthly income, hire form, and night shift  
16 were also found significantly correlated with turnover intention, and no difference was  
17 found between physicians and nurses.  
18  
19

20  
21 **Conclusions:** The turnover intention is significantly affected by job burnout,  
22 satisfaction, and demographic characteristics including age, education level, monthly  
23 income, hire form, and night shift. Satisfaction can be regarded as a mediator between  
24 job burnout and turnover intention. Relative measures can be taken to promote  
25 enthusiasm and satisfaction thus decreasing the turnover rate.  
26  
27  
28  
29  
30  
31

32  
33  
34 **Keywords:** Burnout; Job Satisfaction; Turnover Intention; Mediating Effect;  
35 Healthcare  
36  
37  
38  
39  
40  
41  
42  
43  
44  
45  
46  
47  
48  
49  
50  
51  
52  
53  
54  
55  
56  
57  
58  
59  
60

### Strengths and limitations of this study

- Structural equation modeling is adopted so that the qualitative and quantitative analyses can explore the relationship between job burnout, satisfaction, and turnover intention.
- A multiple-group analysis was conducted between the physicians and nurses guaranteeing the applicability.
- This study summarizes the influence demographic characteristics posed on the turnover intention among China's primary healthcare workers, enriching the study content.
- The reliability of structural equation modeling is repeatedly tested.
- Inability to accurately discuss the representativeness of the cross-sectional study.

## 1 Background

Health and medical personnel play a seminal role in fulfilling the healthcare needs of the entire population, therefore, a robust allocation of human resources maintains the health system running smoothly and also guarantees people accessing to healthcare priority equally [1]. Unfortunately, the current out-of-balance between healthcare staff supply and demand has challenged this priority and triggered a global problem of continual brain drain. Up to 2013, the scarcity of healthcare workers (including physicians, nurses, and midwives) worldwide was estimated at 7.2 million, and it will sharply rising to 12.9 million by 2035 [2].

As a developing country with a huge population, China's shortage of health workforce has posed one of the major obstacles to primary healthcare services. According to the *China health statistics yearbook*, there are only 0.46 pediatricians per 1,000 children, much lower than the staff allocation standard of 2.06. Equally consistent is the finding that the number of anesthesiologists per 10,000 people is less than 0.65, while the number in some developed countries in Europe is 2.5 to 3 [3]. To make matters worse, primary healthcare workers are generally confronted with the challenge of high turnover intention, which has become a social problem to be reckoned with [4]. Results of a survey show that from 2010 to 2016, the proportion of Chinese primary healthcare staff decreased from 44% to 33% [5]. Moreover, the average turnover rate of nurses in first-class tertiary hospitals is 5.8% in China, which goes up to 8-10% in economically advanced regions like Shanghai and Guangzhou [6]. Under this circumstance, the turnover intention has been an important and popular study subject in psychology and management field.

Turnover intention reflects an individual's conscious and deliberate willfulness to quit one's job or organization within a certain period, which would possibly pose a major problem in healthcare system resulting in a high turnover rate [7-9]. That is to say, the turnover intention is the strongest cognitive precursor of turnover, directly affecting the choice of departure. Because of a considerable number of predictive modeling formulas of voluntary turnover has been established, researchers generally recognized and supported that several hypothesized variables are associated with the intention to leave, involving commuting stress, emotional intelligence, job stress, job burnout, and job satisfaction [10-13]. Among the hypothesized linkages above, job burnout and satisfaction are the most common proposed antecedents.



1  
2  
3 In the late 1980s, Pines and Aronson defined job burnout as a state of physical,  
4 emotional, and mental exhaustion [14,15]. It describes the individuals' psychological  
5 response to prolonged interpersonal and chronic emotional stressors, dominantly  
6 caused by a long-term involvement in emotionally demanding situations [16]. Job  
7 burnout can be categorized into three dimensions, including emotional exhaustion,  
8 depersonalization, and the sense of reduced personalized accomplishment. Looking  
9 from the former researches, job burnout has a strong positive relationship with turnover  
10 intention whereas a negative relation with job satisfaction [17,18]. Job satisfaction  
11 encompasses employees' feelings and thoughts about various aspects of their job. In  
12 other words, job satisfaction refers to an individual's cognitive or effective evaluation  
13 of his or her occupational duties, presenting the extent people like the job and reflecting  
14 the effective judgments people hold toward their work condition [19,20]. Numerous  
15 studies have repeatedly verified that job satisfaction is inversely related to turnover and  
16 intent to leave. In addition to direct effects, we propose that job satisfaction serves as a  
17 mediator through which job burnout affects turnover intention as well. Yet, there is still  
18 a lack of literature supporting our hypothesis, hence, it is necessary to conduct this study  
19 to make up the gap.

20  
21  
22 Taken together, the theoretical framework utilized in this study originated from  
23 researches suggesting that turnover intention maybe both related to satisfaction and  
24 burnout toward the job. Accordingly, we hypothesized that:

25  
26 H1: Job burnout is positively related to turnover intention.

27  
28 H2: Job satisfaction is negatively related to turnover intention.

29  
30 H3: Job satisfaction is negatively related to job burnout.

31  
32 H4: Job satisfaction has a mediating effect between job burnout and turnover intention.

33  
34 As shown in Figure 1, we tested this theoretical model with the data from primary  
35 healthcare staff in central China to explore the mediating effect of satisfaction.

## 36 37 **2 Methods**

### 38 39 **2.1 Design and Sample**

40  
41 In this investigation, we utilized survey research methods to make sense of the job  
42 burnout, satisfaction, and turnover intention of primary healthcare staff. From March to  
43 May 2019, a cross-sectional study was conducted in Huangpi District of Wuhan in  
44 central China. The sample size was estimated with the average detection rate of burnout  
45 in China with the equation:  $n = Z_{(\alpha/2)}^2 \times p \times (1 - p) / \delta^2$ , where  $\alpha$  is 0.05,  $\delta$  is 0.08, and

*p* is 55%. To compensate for the non-response rate, the sample was increased by 10% with a final sample size of 540. Participants involved met the following inclusion criteria: ① working for at least 6 months; ② did not have a mental illness or obstacle in communication; and ③ volunteered to participate in the survey. All participants were recruited face-to-face, and the study data was anonymous to protect privacy. Ethical approval for this study was granted by the Research Ethics Boards of Wuhan University, and informed consent was obtained. The questionnaire comprised following sections: sociodemographic information, job satisfaction, job burnout, and turnover intention. (See detail in Appendix)

## **2.2 Methods of Measurement**

### **2.2.1 Job Satisfaction**

On the bases of the local actual condition, we collected the job satisfaction information utilizing an adjusted satisfaction scale. The adjusted scale referred for the Minnesota Satisfaction Questionnaire (MSQ) [21], Job Satisfaction Survey (JSS) [22], and Job Descriptive Index (JDI) [23], including 14 items (item 1 to 14) about the satisfaction with the internal environment, external environment, remunerations, management, and work itself. Participants responded to a 5-point Likert scale ranging from 1 point (the most unsatisfaction) to 5 points (the most satisfaction). A higher score indicates a higher satisfaction.

### **2.2.2 Job Burnout**

The information on participants' job burnout was gathered with an adjusted 5-point Likert burnout scale according to the Maslach Burnout Inventory-General Survey (MBI-GS) developed by Maslach and Jackson [24]. Several emotion-related items were used to describe participants' burnout experience, including "I'm interested in my job" (item 15, reverse coded), "I'm fit for this job" (item 16, reverse coded), "I think my work is challenging" (item 17), "My work is heavy" (item 18), "I think my work is meaningless" (item 19), "I can't find personal accomplishment in my job" (item 20), "I feel exhausted" (item 21), "I'm indifference of my job" (item 22), and "I feel anxious and fretful" (item 23). A higher score indicates a greater propensity for job burnout.

### **2.2.3 Turnover Intention**

The turnover intention was similarly measured with an adjusted scale concerning several plan-related items. The adjusted scale referred for a six-item version of the

1  
2  
3 turnover intention scale (TIS-6) explored by Griffeth [25]. The items include “I once  
4 thought to leave my current organization” (item 24), “I shall likely seek a new job  
5 within the next year” (item 25), “I shall accept a new job if I have a chance” (item 26),  
6 “I consider that the employment situation is favorable” (item 27), and “I can find a  
7 good job” (item 28). The above items were evaluated with a 5-point Likert scale, where  
8 1 represents strongly disagree, 2 represents disagree, 3 represents slightly disagree, 4  
9 represents agree, and 5 represents strongly agree.

## 15 **2.3 Statistical Analysis**

16  
17 All statistical analyses and hypothesis testing were performed using SPSS version  
18 22.0 and AMOS version 21.0, with two-sided tests. In the first stage, an empirical study  
19 was processed to optimize items in each scale, including discrimination tests and  
20 collinearity diagnostics. Then, an exploratory factor analysis (EFA), confirmatory  
21 factor analysis (CFA), and a Cronbach’s alpha coefficient method were applied to  
22 check the discriminant validity and reliability of above-mentioned scales. In the next  
23 stage, the Pearson product-moment correlation coefficients were calculated to analyze  
24 the correlations between variables. Last, the effect of job burnout on turnover intention  
25 via satisfaction was examined using a structural equation modeling (SEM) with  
26 maximum likelihood estimation. The mediation effect test was carried out by using the  
27 bootstrap method. The goodness-of-fit of the model was evaluated with chi-square  
28 statistic, the goodness of fit index (GFI), the comparative fit index (CFI), the root mean  
29 square error of approximation (RMSEA), the non-normed fit index (NNFI), and the  
30 incremental fit index (IFI).

## 41 **2.4 Patient and public involvement**

42  
43 Participants were not involved in development of the research question and outcome  
44 measures, study design or conduct of this study.

## 47 **3 Results**

### 49 **3.1 Profile of Sample**

50  
51 A total of 1300 electronic questionnaires were sent out, and 1279 eligible participants  
52 left after deleting those with uncompleted or suspected unreal answers. The effective  
53 rate is 98.38%. As shown in Table 1, over half of the participants (66.50%) were female;  
54 79.12% were married; 43.55% were physicians and 41.83% were nurses; 63.02%  
55 earned 2001-4000 Chinese Renminbi (RMB, US \$ 290.97-581.65) per month. The most  
56 frequent occupational title was junior title (accounting for 46.76%) and the most  
57  
58  
59  
60

frequent education level was separately undergraduate degree and above (accounting for 47.46%) and junior college degree (accounting for 37.06%). The prevalence rate of satisfaction, job burnout, and turnover intention was separately 79.99%, 18.69%, and 26.04%. The median (range) score of satisfaction, job burnout, and turnover intention was 52 (13-65), 22 (9-37), and 12 (5-25).

## 3.2 Tests of the Hypothetical Model

### 3.2.1 Reliability and Validity Analysis

Before reliability analysis and validity analysis, we applied discrimination tests and collinearity diagnostics to filter optimal items. Although the adjusted satisfaction scale yields high indices of discrimination, there exists strong collinearity from item 1 to item 7, item 12, and item 13. After all comprehensive considerations, we deleted relative items except item 1. The Cronbach's  $\alpha$  of this scale reaches 0.956, indicating satisfactory reliability. Moreover, the modified scale construction is effective measuring by EFA (Kaiser-Meyer-Olkin = 0.928,  $P < 0.001$ ) and suitable for CFA. The model finally fit the data acceptably ( $\chi^2/df=21.883$ ,  $P < 0.001$ ,  $GFI = 0.973$ ,  $CFI = 0.988$ ,  $RMSEA = 0.128$ ,  $NNFI = 0.987$ ,  $IFI = 0.988$ ).

In the adjusted burnout scale, we omitted the items from 15 to 17, 19, and 21 because of a low distinguishability in discriminant analysis. Cronbach's  $\alpha$  of this scale was increasing to 0.802. Besides, the adjusted burnout also has a good validity conducted by EFA and CFA ( $\chi^2/df=8.395$ ,  $P < 0.001$ ,  $GFI = 0.993$ ,  $CFI = 0.994$ ,  $RMSEA = 0.076$ ,  $NNFI = 0.994$ ,  $IFI = 0.994$ ).

Similar in the adjusted turnover intention scale, item 27 was removed. The Cronbach's  $\alpha$  coefficient for the remaining 4 items ( $\alpha = 0.865$ ) indicated good internal consistency reliability. And the validity is acceptable ( $\chi^2/df=29.072$ ,  $P < 0.001$ ,  $GFI = 0.980$ ,  $CFI = 0.979$ ,  $RMSEA = 0.148$ ,  $NNFI = 0.978$ ,  $IFI = 0.979$ ).

### 3.2.2 Correlation Analysis

Table 2 demonstrates the means, standard deviations, and correlation coefficients among three dimensions of job satisfaction, burnout, and turnover intention. As is indicated that job satisfaction has both a significant negative relation with turnover intention ( $r = -0.414$ ,  $P < 0.001$ ) and job burnout ( $r = -0.387$ ,  $P < 0.001$ ). Job burnout showed a significant positive correlation with turnover intention ( $r = 0.797$ ,  $P < 0.001$ ).

### 3.2.3 Structural Equation Model

As can be seen in Figure 2 and Table 3, three latent variables in the model were

1  
2  
3 significantly intercorrelated. The standardized path coefficient of path a (Job burnout  
4 → Satisfaction), b (Satisfaction → Turnover intention), and c' (Job burnout → Turnover  
5 intention) was respectively -0.406 (C.R. = -14.254,  $P < 0.001$ ), -0.116 (C.R. = -6.054,  
6  $P < 0.001$ ), and 0.857 (C.R. = 34.304,  $P < 0.001$ ). Taken path a as an example, it means  
7 that for each one unit decrease in the job burnout, the change in satisfaction increases  
8 by 0.406. The mediating effect of satisfaction was significant ( $P < 0.001$ ) with the path  
9 coefficient of 0.047, making up 5.20% of the total effect (proportion =  $a \times b/c$ ,  $0.406$   
10  $\times 0.116/0.906 = 0.052$ ). The hypothetical model yields satisfactory values ( $GFI = 0.936$ ,  
11  $CFI = 0.969$ ,  $RMSEA = 0.072$ ,  $NNFI = 0.964$ ,  $IFI = 0.969$ ), indicating credible data fit.

12  
13  
14  
15  
16  
17  
18  
19  
20  
21  
22  
23  
24  
25  
26  
27  
28  
29  
30  
31  
32  
33  
34  
35  
36  
37  
38  
39  
40  
41  
42  
43  
44  
45  
46  
47  
48  
49  
50  
51  
52  
53  
54  
55  
56  
57  
58  
59  
60  
Variables such as age, education, income, etc. were introduced in the model to further  
research on the influences. Figure 3 illustrates the standardized path coefficient between  
each variable. Educational level, monthly income, and hire form showed a direct ( $r =$   
0.078, -0.037, 0.047 respectively) and indirect ( $r =$  0.008, -0.018, 0.015 respectively)  
effect on turnover intention. Also, age and night shift could affect turnover intention  
through job burnout with the standard path coefficient of -0.112 and 0.064. This model  
also showed a good fit to the data:  $GFI = 0.939$ ,  $CFI = 0.965$ ,  $RMSEA = 0.059$ ,  $NNFI$   
 $= 0.957$ ,  $IFI = 0.965$ .

To further deal with the stability of the model, a multiple-group analysis was  
conducted between the physicians and nurses. Table 4 summarizes the testing for  
invariant factorial structure between physicians and nurses. The  $P$  values of the model  
of measurement weights and structural weights were separately 0.30 and 0.35,  
confirming the stability. Although  $P$  values were lower than 0.05 in the model of  
structural covariances, structural residuals, and measurement residuals, incredibly small  
variations were presented in indices of fit (all variations change  $< 0.05$ ). Therefore, the  
model can be regarded as stable in physicians and nurses.

#### 4 Discussion

Our study demonstrated that the prevalence rate of job burnout and turnover intention  
was respectively 18.69% and 26.04% in Huangpi District. The results are quite  
consistent with previous researches in China [26,27]. As we know, Huangpi District is  
an under-development rural area in central China, whose medical resources and clinical  
ability represent the averaged level in China. Medical innovation and reform were  
performed since 2009, and from that time Huangpi District is famous for its new and  
unique management model as a demonstration plot of health-management. Therefore,

1  
2  
3 a study on job burnout and turnover intention conducted here is noted concerned.  
4

5 In line with earlier studies, our results recognized that job burnout positively  
6 predicted turnover intention, with an explanatory power up to 68.30% [28,29]. For job  
7 burnout and its four latent measures, “no personal accomplishment”, “indifference”,  
8 and “anxious and fretful” show a strong correlation with burnout except for “a heavy  
9 work”. It is generally believed that burnout is intrinsically related to work factors and  
10 secondly to personality factors [30]. Hence, it is necessary for hospital managers to  
11 think about the role conflict and the way to solve emotional exhaustion and reduced  
12 personalized accomplishment. It was additionally found that satisfaction could directly  
13 or indirectly affect turnover intention, although its direct effect and mediating effect  
14 were relatively limited. The present study helps illuminate the relations between  
15 burnout, satisfaction, and turnover that were not apparent before, as most previous  
16 studies focused on satisfaction’s direct impact on turnover instead of a mediator [31,32].  
17 This study confirms the partial mediating effect of satisfaction. Accordingly, more  
18 attention should be attached to both job burnout and satisfaction. Considering the items  
19 contained in the satisfaction, the improvement of working conditions, welfares,  
20 advanced-learning opportunities, and reward mechanisms is worthy of concern.  
21  
22  
23  
24  
25  
26  
27  
28  
29  
30  
31  
32

33 Apart from it, the turnover intention is noted to be affected by age, education level,  
34 monthly income, hire form, and night shift directly or through the mediators of  
35 satisfaction and burnout. This influence shows no difference between physicians and  
36 nurses. It is generally known that primary healthcare institutions play an essential role  
37 in medical providing and safeguarding among the broadest masses of people. In past  
38 decades, the medical quality and service standard in primary medical institutions was  
39 continually enhanced with the in-depth development of national medical and health  
40 system reform. But most of the basic healthcare staff in China still encounter low  
41 salaries, less independence, and few promotion prospects, which could lead to job  
42 burnout, unsatisfaction even turnover [33,34]. To fully utilize health resources and to  
43 improve the healthcare system's overall social impacts, governments and  
44 concerned departments should emphasize more attention to optimize medical resources  
45 allocation [35]. Under market economy conditions, public hospital managers should  
46 also establish and consummate hospital operation and management systems. As an  
47 occupation with high risk, pressure, and skill, healthcare staffs deserve a high payment.  
48 However, some studies reveal that there is a huge income gap between China and  
49  
50  
51  
52  
53  
54  
55  
56  
57  
58  
59  
60

1  
2  
3 developed countries [36]. The average monthly salary of Chinese health workers in  
4 2017 was about 6669 RMB (approximately \$ 969.54) [37]. It is necessary to adopt  
5 a reasonable mechanism of performance incentive and financial management, to  
6 regulate and optimize night-shift works, and to set up a good academic atmosphere at  
7 the same time. Besides, more focuses need to raise on healthcare providers'  
8 psychological states, especially those youth with high educational background and  
9 academic qualification. In this way, the employee's motivation and enthusiasm could  
10 be improved to some extent.

11  
12 Although this study contributes to the knowledge base of the turnover intention  
13 related to job burnout and satisfaction, it does have several limitations. First, causal  
14 relationships among turnover, burnout, and satisfaction should be cautiously interpreted  
15 as this is a cross-sectional study. Second, despite credible reliability and validity, the  
16 scales we used were adjusted based on the existing general scales. Hence, it needs to be  
17 tested and replicated with additional researches. Third, other potential predictors such  
18 as work stress, social support, and mental health were not captured in our questionnaire.  
19 We will continue this study in the future to overcome the shortages.

## 30 **5 Conclusion**

31  
32 The current findings indicate a positive association between job burnout and turnover  
33 intention, while a negative relation between job burnout and satisfaction, as well as  
34 satisfaction and turnover intention. Also, satisfaction can be regarded as a mediator  
35 between job burnout and turnover intention, whose partial mediating effect is 5.20%.  
36 Age, education level, monthly income, hire form, and night shift also influence the  
37 turnover intention, hence, relative measures can be taken to promote enthusiasm and  
38 satisfaction thus decreasing the turnover rate.

## 46 **Abbreviations**

47  
48 **MSQ:** Minnesota Satisfaction Questionnaire, **JSS:** Job Satisfaction Survey, **JDI:** Job  
49 Descriptive Index, **MBI-GS:** Maslach Burnout Inventory-General Survey, **EFA:**  
50 exploratory factor analysis, **CFA:** confirmatory factor analysis, **SEM:** structural  
51 equation modeling, **GFI:** the goodness of fit index, **CFI:** the comparative fit index,  
52 **RMSEA:** the root mean square error of approximation, **NNFI:** the non-normed fit  
53 index, **IFI:** the incremental fit index.  
54  
55  
56  
57  
58  
59  
60

## Figure legends

Figure 1. Hypothesized model of burnout, satisfaction, and turnover intention

Figure 2. The structural equation modeling for the hypothetical model

Figure 3. The structural equation modeling after introducing demographic characteristic

## Acknowledgements

Here we are thankful to all the healthcare staff participated in this study. We are also grateful to all the investigators for collecting and calculating data.

## Contributors

Conceived and designed this paper: Li Ran. Wrote this paper: Li Ran. Calculated data: Li Ran, Xuyu Chen, Shuzhen Peng, and Feng Zheng. Performed the study and collected data: Xuyu Chen and Li Ran. Provided with analysis tools: Professor Xiaodong Tan. Mended and approved the final version: Professor Xiaodong Tan and Ruihua Duan.

## Funding

This research did not receive any specific grant from funding agencies in the public, commercial, or not-for-profit sectors.

## Ethics approval and consent to participate

Ethical approval for this study was granted by the Research Ethics Boards of Wuhan University (No.2018YF0080). Informed consent was obtained from all survey participants.

## Competing interests

The authors declare that they have no competing interests.

## Patient consent for publication

Not required.

## Data sharing statement

Data may be made available by contacting the corresponding author.



**References:**

- [1] D. Feng, S. Su, Y. Yang, J. Xia, Y. Su, "Job satisfaction mediates subjective social status and turnover intention among Chinese nurses," *Nursing & Health Sciences*, vol. 19, no. 3, pp. 388, 2017.
- [2] M. Marć, A. Bartosiewicz, J. Burzyńska, Z. Chmiel, P. Januszewicz, "A nursing shortage – a prospect of global and local policies," *INTERNATIONAL NURSING REVIEW*, vol. 66, no. 1, pp. 9-16, 2019.
- [3] E. Wang, "Requests for cesarean deliveries: The politics of labor pain and pain relief in Shanghai, China," *SOCIAL SCIENCE & MEDICINE*, vol. 173, pp. 1-8, 2017.
- [4] X. Li, J. Lu, S. Hu, et al, "The primary health-care system in China," *The Lancet*, vol. 390, no. 10112, pp. 2584-2594, 2017.
- [5] H. Li, B. Yuan, D. Wang, Q. Meng, "Motivating factors on performance of primary care workers in China: a systematic review and meta-analysis," *BMJ Open*, vol. 9, pp. e28619, 2019.
- [6] Q. Du, Y. Li, Z. Shi, "Application of performance management in the nurses overall quality of quantitative management," *Chinese Journal of Modern Nursing*, vol. 19, no. 27, pp. 3407-3409, 2013.
- [7] J. P. Meyer and N. J. Allen, "A Three-Component Model Conceptualization of Organizational Commitment," *HUMAN RESOURCE MANAGEMENT REVIEW*, vol. 78, no. 1, pp. 61-89, 2016.
- [8] Y. H. Lee and P. Chelladurai, "Emotional intelligence, emotional labor, coach burnout, job satisfaction, and turnover intention in sport leadership," *European Sport Management Quarterly*, vol. 18, no. 4, pp. 393-412, 2018.
- [9] A. Sousa-Poza and F. Henneberger, "Analyzing Job Mobility with Job Turnover Intentions: An International Comparative Study," *JOURNAL OF ECONOMIC ISSUES*, vol. 38, no. 1, pp. 113-137, 2004.
- [10] K. Amponsah-Tawiah, F. Annor, B. G. Arthur, "Linking commuting stress to job satisfaction and turnover intention: The mediating role of burnout," *Journal of Workplace Behavioral Health*, vol. 31, no. 2, pp. 104-123, 2016.
- [11] L. F. Yang, J. Y. Liu, Y. H. Liu, "Job burnout and turnover intention among nurses in China: the mediating effects of positive emotion," *Chinese Nursing Research*, vol. 5, no. 1, pp. 43-47, 2018.

- 1  
2  
3 [12]E. Hong and Y. S. Lee, "The mediating effect of emotional intelligence between  
4 emotional labour, job stress, burnout and nurses' turnover intention," *International*  
5 *Journal of Nursing Practice*, vol. 22, no. 6, pp. 625-632, 2016.  
6  
7  
8 [13]H. L. Ye and P. Chelladurai, "Emotional intelligence, emotional labor, coach  
9 burnout, job satisfaction, and turnover intention in sport leadership," *European*  
10 *Sport Management Quarterly*, vol., pp. 1-20, 2017.  
11  
12 [14]A. Pavlakis, V. Raftopoulos, M. Theodorou, "Burnout syndrome in Cypriot  
13 physiotherapists: a national survey," *BMC HEALTH SERVICES RESEARCH*, vol.  
14 10, no. 1, pp. 1-8, 2010.  
15  
16 [15]A. M. Pines, "Marriage burnout: A new conceptual framework for working with  
17 couples.," *Psychotherapy in Private Practice*, vol. 5, no. 2, pp. 31-44, 1987.  
18  
19 [16]H. Kroll, T. Macaulay, M. Jesse, "A preliminary survey examining predictors of  
20 burnout in pain medicine physicians in the United States," *Pain Physician*, vol. 19,  
21 no. 5, pp. E689, 2016.  
22  
23 [17]C. A. Wong and H. K. S. Laschinger, "The Influence of Frontline Manager Job  
24 Strain on Burnout, Commitment and Turnover Intention: A Cross-sectional Study,"  
25 *INTERNATIONAL JOURNAL OF NURSING STUDIES*, vol. 52, no. 12, pp. 1824-  
26 1833, 2015.  
27  
28 [18]A. C. C. Lu and D. Gursoy, "Impact of Job Burnout on Satisfaction and Turnover  
29 Intention: Do Generational Differences Matter?" *Journal of Hospitality & Tourism*  
30 *Research*, vol. 40, no. 2, pp. 210-235, 2016.  
31  
32 [19]H. Samadi Miarkolaei and H. Samadi Miarkolaei, "An investigation on relationship  
33 between employees ' job satisfaction and organizational commitment,"  
34 *Management Science Letters*, vol. 4, no. 4, pp. 669-678, 2014.  
35  
36 [20]T. Aldrees, S. Al-Eissa, M. Badri, A. Aljuhayman, M. Zamakhshary, "Physician  
37 job satisfaction in Saudi Arabia: insights from a tertiary hospital survey," *ANNALS*  
38 *OF SAUDI MEDICINE*, vol. 35, no. 3, pp. 210, 2015.  
39  
40 [21]D. J. Weiss, R. V. Dawis, G. W. England, "Manual for the Minnesota Satisfaction  
41 Question," *Minnesota Studies in Vocational Rehabilitation*, vol. 22, pp.1967.  
42  
43 [22]T. Andreas and S. Pavlos, "Validity and reliability of the Greek translation of the  
44 Job Satisfaction Survey (JSS)," *Bmc Psychology*, vol. 6, no. 1, pp. 27, 2018.  
45  
46 [23]S. Lopes, M. J. Chambel, F. Castanheira, F. Oliveira-Cruz, "Measuring job  
47 satisfaction in Portuguese military sergeants and officers: Validation of the Job  
48  
49  
50  
51  
52  
53  
54  
55  
56  
57  
58  
59  
60

- 1  
2  
3 Descriptive Index and the Job in General scale.," *MILITARY PSYCHOLOGY*, vol.  
4 27, no. 1, pp. 52-63, 2015.
- 5  
6  
7 [24]N. Schutte, S. Toppinen, R. Kalimo, W. Schaufeli, "The factorial validity of the  
8 Maslach Burnout Inventory - General Survey (MBI - GS) across occupational  
9 groups and nations," *Journal of Occupational & Organizational Psychology*, vol.  
10 73, no. 1, pp. 53-66, 2011.
- 11  
12  
13 [25]C. F. C. Bothma and G. Roodt, "The validation of the turnover intention scale,"  
14 *South African Journal of Human Resource Management*, vol., pp.2013.
- 15  
16  
17 [26]Y. Gan, H. Jiang, L. Li, et al, "Prevalence of burnout and associated factors among  
18 general practitioners in Hubei, China: a cross-sectional study," *BMC PUBLIC*  
19 *HEALTH*, vol. 19, no. 1, pp. 1607, 2019.
- 20  
21  
22 [27]Y. Mao, H. Rongxin, J. Liu, N. Zhang, B. Zhu, "Turnover intention of primary  
23 health workers in China: a systematic review," *The Lancet*, vol. 392, pp. S17, 2018.
- 24  
25  
26 [28]L. F. Yang, J. Y. Liu, Y. H. Liu, "Job burnout and turnover intention among nurses  
27 in China:the mediating effects of positive emotion," *Chinese Nursing Research*,  
28 vol. 5, no. 1, pp. 43-47, 2018.
- 29  
30  
31 [29]K. Amponsah-Tawiah, F. Annor, B. G. Arthur, "Linking commuting stress to job  
32 satisfaction and turnover intention: The mediating role of burnout," *Journal of*  
33 *Workplace Behavioral Health*, vol. 31, no. 2, pp. 104-123, 2016.
- 34  
35  
36 [30]T. Lubbadeh, "JOB BURNOUT: A GENERAL LITERATURE REVIEW,"  
37 *International Review of Management and Marketing*, vol. 10, pp. 7-15, 2020.
- 38  
39  
40 [31]B. Coomber and K. Louise Barriball, "Impact of job satisfaction components on  
41 intent to leave and turnover for hospital-based nurses: A review of the research  
42 literature," *INTERNATIONAL JOURNAL OF NURSING STUDIES*, vol. 44, no. 2,  
43 pp. 297-314, 2007.
- 44  
45  
46 [32]I. Chen, R. Brown, B. J. Bowers, W. Chang, "Work-to-family conflict as a mediator  
47 of the relationship between job satisfaction and turnover intention," *JOURNAL OF*  
48 *ADVANCED NURSING*, vol. 71, no. 10, pp. 2350-2363, 2015.
- 49  
50  
51 [33]X. D. Zhou, L. Li, T. Hesketh, "Health system reform in rural China: Voices of  
52 healthworkers and service-users," *SOCIAL SCIENCE & MEDICINE*, vol. 117, no.  
53 1982, pp. 134-141, 2014.
- 54  
55  
56 [34]H. Li and G. Y. Yin, "Discussion on the human resource management of public  
57 hospitals under the implementation of the new medical reform," *China Medical*  
58  
59  
60

1  
2  
3 *Herald*, vol. 9, no. 5, pp. 161-163, 2012.

4  
5 [35]E. Yaylali, P. G. Farnham, K. L. Schneider, et al, "From Theory to Practice:  
6 Implementation of a Resource Allocation Model in Health Departments," *Journal*  
7 *of Public Health Management & Practice Jphmp*, vol. 22, no. 6, pp. 567, 2016.

8  
9  
10 [36]J. Li, R. H. Feng, Y. Cui, M. Li, Y. Mao, X. Wang, "Comparison and Enlightenment  
11 on Health Staff , Income in Typical Countries under Different Economic  
12 Development," *Chinese Health Economics*, vol. 32, no. 1, pp. 91-93, 2013.

13  
14  
15 [37]J. You, "Research on the Current Situation and Improvement Strategy of Medical  
16 Personnel Salary Level in China," *Chinese Health Economics*, vol. 37, no. 8, pp.  
17 17-21, 2018.  
18  
19  
20  
21  
22  
23  
24  
25  
26  
27  
28  
29  
30  
31  
32  
33  
34  
35  
36  
37  
38  
39  
40  
41  
42  
43  
44  
45  
46  
47  
48  
49  
50  
51  
52  
53  
54  
55  
56  
57  
58  
59  
60

Table 1. Description of the respondents (n=1279)

| Variables                          | N (%)        | Satisfaction        |          | Job Burnout         |          | Turnover Intention  |          |
|------------------------------------|--------------|---------------------|----------|---------------------|----------|---------------------|----------|
|                                    |              | Prevalence rate (%) | $\chi^2$ | Prevalence rate (%) | $\chi^2$ | Prevalence rate (%) | $\chi^2$ |
| <b>Sex</b>                         |              |                     | 0.016    |                     | 3.233    |                     | 2.328    |
| male                               | 429 (33.50)  | 26.9                |          | 7.19                |          | 9.62                |          |
| female                             | 850 (66.50)  | 53.09               |          | 11.5                |          | 16.42               |          |
| <b>Age (years)</b>                 |              |                     | 13.853** |                     | 33.398** |                     | 55.014** |
| ≤30                                | 380 (29.71)  | 23.31               |          | 7.74                |          | 10.48               |          |
| 31-40                              | 366 (28.62)  | 21.5                |          | 5.79                |          | 8.99                |          |
| 41-50                              | 436 (34.09)  | 28.46               |          | 4.85                |          | 5.94                |          |
| ≥51                                | 97 (7.58)    | 6.72                |          | 0.31                |          | 0.63                |          |
| <b>Occupation</b>                  |              |                     | 2.562    |                     | 3.045    |                     | 3.698    |
| physician                          | 557 (43.55)  | 34.4                |          | 8.29                |          | 12.28               |          |
| nurse                              | 535 (41.83)  | 34.09               |          | 7.27                |          | 10.63               |          |
| specialists in laboratory medicine | 89 (6.96)    | 5.71                |          | 1.72                |          | 1.41                |          |
| public health physician            | 65 (5.08)    | 3.83                |          | 0.86                |          | 1.17                |          |
| pharmacist                         | 33 (2.55)    | 1.95                |          | 0.55                |          | 0.55                |          |
| <b>Educational level</b>           |              |                     | 4.146    |                     | 7.692    |                     | 23.072** |
| junior school and below            | 16 (1.25)    | 0.94                |          | 0.31                |          | 0.39                |          |
| high school/technical school       | 182 (14.23)  | 11.73               |          | 1.8                 |          | 1.88                |          |
| junior college degree              | 474 (37.06)  | 30.34               |          | 6.57                |          | 9.23                |          |
| undergraduate degree and above     | 607 (47.46)  | 36.98               |          | 10.01               |          | 14.54               |          |
| <b>Marital status</b>              |              |                     | 8.618    |                     | 13.308*  |                     | 26.538** |
| married                            | 1012 (79.12) | 64.12               |          | 13.29               |          | 18.22               |          |
| unmarried                          | 227 (17.75)  | 13.76               |          | 4.77                |          | 6.96                |          |
| divorced/Widowed                   | 40 (3.13)    | 2.11                |          | 0.63                |          | 0.86                |          |

1  
2  
3  
4  
5  
6  
7  
8  
9  
10  
11  
12  
13  
14  
15  
16  
17  
18  
19  
20  
21  
22  
23  
24  
25  
26  
27  
28  
29  
30  
31  
32  
33  
34  
35  
36  
37  
38  
39  
40  
41  
42  
43  
44  
45  
46

|                                  |             |       |          |       |          |       |          |
|----------------------------------|-------------|-------|----------|-------|----------|-------|----------|
| <b>Technical post title</b>      |             |       | 8.8      |       | 7.039    |       | 4.691    |
| no title                         | 286 (22.36) | 18.45 |          | 4.53  |          | 6.25  |          |
| junior title                     | 598 (46.76) | 36.75 |          | 9.23  |          | 12.9  |          |
| intermediate title               | 288 (22.52) | 17.36 |          | 4.07  |          | 5.16  |          |
| senior title                     | 107 (8.36)  | 7.43  |          | 0.86  |          | 1.73  |          |
| <b>Monthly income (RMB)</b>      |             |       | 16.713** |       | 12.166*  |       | 19.817** |
| ≤2000                            | 71 (5.55)   | 3.99  |          | 1.25  |          | 2.19  |          |
| 2001-3000                        | 339 (26.51) | 19.55 |          | 6.18  |          | 8.61  |          |
| 3001-4000                        | 467 (36.51) | 30.18 |          | 6.25  |          | 8.05  |          |
| 4001-5000                        | 266 (20.80) | 17.51 |          | 2.74  |          | 4.69  |          |
| ≥5001                            | 136 (10.63) | 8.76  |          | 2.27  |          | 2.5   |          |
| <b>Hire from</b>                 |             |       | 5.467    |       | 9.631*   |       | 19.637** |
| personnel agent staff            | 171 (13.37) | 52.15 |          | 10.63 |          | 14.78 |          |
| permanent staff                  | 825 (64.50) | 9.93  |          | 3.45  |          | 5.08  |          |
| contract staff                   | 173 (13.53) | 10.87 |          | 2.58  |          | 3.29  |          |
| temporary staff                  | 110 (8.60)  | 7.04  |          | 2.03  |          | 2.89  |          |
| <b>Working time (hours/week)</b> |             |       | 30.865** |       | 34.103** |       | 37.055** |
| ≤30                              | 15 (1.17)   | 0.78  |          | 0.39  |          | 0.47  |          |
| 31-40                            | 629 (49.18) | 41.91 |          | 6.25  |          | 9.38  |          |
| 41-50                            | 427 (33.39) | 26.19 |          | 7.35  |          | 9.93  |          |
| ≥51                              | 208 (16.26) | 11.11 |          | 4.69  |          | 6.25  |          |
| <b>Working years</b>             |             |       | 13.485** |       | 26.683** |       | 44.637** |
| 1-5                              | 326 (25.49) | 20.17 |          | 6.57  |          | 8.99  |          |
| 6-10                             | 202 (15.79) | 11.57 |          | 3.21  |          | 5.39  |          |
| 11-15                            | 115 (8.99)  | 7.04  |          | 1.95  |          | 2.51  |          |
| 16-20                            | 201 (15.72) | 12.28 |          | 3.05  |          | 3.68  |          |
| ≥21                              | 435 (34.01) | 28.93 |          | 3.91  |          | 5.47  |          |
| <b>Night shift</b>               |             |       | 3.406    |       | 18.827** |       | 17.374** |
| 0                                | 769 (60.13) | 49.02 |          | 9.07  |          | 13.21 |          |

|              |                   |              |          |              |          |              |          |
|--------------|-------------------|--------------|----------|--------------|----------|--------------|----------|
| 1-3          | 471 (36.83)       | 28.46        |          | 8.6          |          | 11.65        |          |
| >3           | 39 (3.04)         | 2.51         |          | 1.02         |          | 1.18         |          |
| <b>Total</b> | <b>1279 (100)</b> | <b>79.99</b> | <b>—</b> | <b>18.69</b> | <b>—</b> | <b>26.04</b> | <b>—</b> |

Notes: \*  $P < 0.05$ , \*\*  $P < 0.01$

For peer review only

Table 2. Pearson correlation among job satisfaction, burnout, and turnover intention of primary healthcare workers

|                                                    | M            | SD           | Job Satisfaction | Job Burnout   | Turnover Intention |
|----------------------------------------------------|--------------|--------------|------------------|---------------|--------------------|
| <b>Job Satisfaction</b>                            | <b>23.06</b> | <b>5.377</b> | <b>1.000</b>     | <b>-0.387</b> | <b>-0.414</b>      |
| Working environment                                | 4.08         | 0.921        | 0.882            | -0.298        | -0.299             |
| Welfare                                            | 3.63         | 1.093        | 0.902            | -0.356        | -0.401             |
| Prospect of my job                                 | 3.84         | 0.963        | 0.911            | -0.370        | -0.403             |
| Training and learning opportunities                | 3.89         | 0.960        | 0.889            | -0.342        | -0.366             |
| Income distribution                                | 3.71         | 1.046        | 0.917            | -0.350        | -0.393             |
| Management system and business process             | 3.91         | 0.941        | 0.908            | -0.386        | -0.384             |
| <b>Job Burnout</b>                                 | <b>10.87</b> | <b>4.392</b> | <b>-0.387</b>    | <b>1.000</b>  | <b>0.797</b>       |
| My work is heavy                                   | 3.42         | 1.008        | -0.134           | 0.365         | 0.325              |
| I can't find personal accomplishment in my job     | 2.10         | 0.990        | -0.319           | 0.889         | 0.679              |
| I'm indifference of my job                         | 2.02         | 0.996        | -0.352           | 0.911         | 0.737              |
| I feel anxious and fretful                         | 2.16         | 1.006        | -0.373           | 0.884         | 0.752              |
| <b>Turnover Intention</b>                          | <b>8.97</b>  | <b>3.614</b> | <b>-0.414</b>    | <b>0.797</b>  | <b>1.000</b>       |
| I once thought to leave my current organization    | 2.24         | 1.104        | -0.430           | 0.765         | 0.881              |
| I shall likely seek a new job within the next year | 1.86         | 0.869        | -0.297           | 0.763         | 0.841              |
| I shall accept a new job if I have a chance        | 2.45         | 1.207        | -0.403           | 0.652         | 0.881              |
| I can find a good job                              | 2.43         | 1.076        | -0.231           | 0.543         | 0.788              |

Notes: All  $P_s < 0.01$ . M- mean value; SD- standard deviation



Table 3. The standard effects in the hypothetical model

| Endogenous variables | Exogenous variables | Estimate | C.R.    | Direct effect ( <i>P</i> ) | Indirect effect ( <i>P</i> ) | Total effect ( <i>P</i> ) |
|----------------------|---------------------|----------|---------|----------------------------|------------------------------|---------------------------|
| Turnover intention   | Burnout             | 0.857    | 34.304  | 0.857 (< 0.001)            | 0.047 (< 0.001)              | 0.904 (< 0.001)           |
|                      | Satisfaction        | -0.116   | -6.054  | -0.116 (< 0.001)           | ---                          | -0.116 (< 0.001)          |
| Satisfaction         | Burnout             | -0.406   | -14.254 | -0.406 (< 0.001)           | ---                          | -0.406 (< 0.001)          |

Notes: C.R.- critical ratios

1  
2  
3  
4  
5  
6  
7  
8  
9  
10  
11  
12  
13  
14  
15  
16  
17  
18  
19  
20  
21  
22  
23  
24  
25  
26  
27  
28  
29  
30  
31  
32  
33  
34  
35  
36  
37  
38  
39  
40  
41  
42  
43  
44  
45  
46

Table 4. Testing for invariant factorial structure of a measuring instrument

| <b>Model</b>           | <b>delta-<math>\chi^2</math></b> | <b>delta-df</b> | <b>P</b> | <b>delta-<math>\chi^2</math>/df</b> | <b>delta-GFI</b> | <b>delta-AGFI</b> | <b>delta-NFI</b> | <b>delta-RFI</b> | <b>delta-IFI</b> | <b>delta-TLI</b> |
|------------------------|----------------------------------|-----------------|----------|-------------------------------------|------------------|-------------------|------------------|------------------|------------------|------------------|
| Measurement weights    | 12.868                           | 11              | 0.30     | -0.001                              | 0.002            | -0.001            | 0.002            | -0.001           | 0.002            | 0                |
| Structural weights     | 23.876                           | 22              | 0.35     | -0.002                              | 0.005            | -0.002            | 0.004            | -0.001           | 0.003            | 0                |
| Structural covariances | 96.197                           | 36              | < 0.05   | -0.007                              | 0.003            | -0.006            | 0.002            | -0.004           | 0.002            | -0.003           |
| Structural residuals   | 99.981                           | 39              | < 0.05   | -0.007                              | 0.003            | -0.006            | 0.002            | -0.004           | 0.002            | -0.003           |
| Measurement residuals  | 199.256                          | 53              | < 0.05   | -0.016                              | -0.003           | -0.012            | -0.001           | -0.009           | -0.001           | -0.008           |

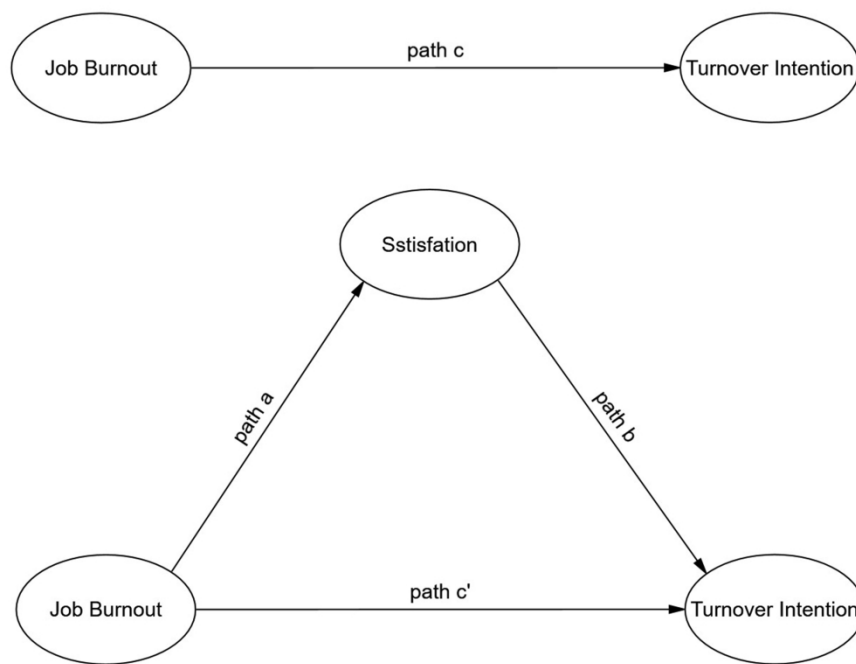

Figure 1. Hypothesized model of burnout, satisfaction, and turnover intention

370x370mm (300 x 300 DPI)

1  
2  
3  
4  
5  
6  
7  
8  
9  
10  
11  
12  
13  
14  
15  
16  
17  
18  
19  
20  
21  
22  
23  
24  
25  
26  
27  
28  
29  
30  
31  
32  
33  
34  
35  
36  
37  
38  
39  
40  
41  
42  
43  
44  
45  
46  
47  
48  
49  
50  
51  
52  
53  
54  
55  
56  
57  
58  
59  
60

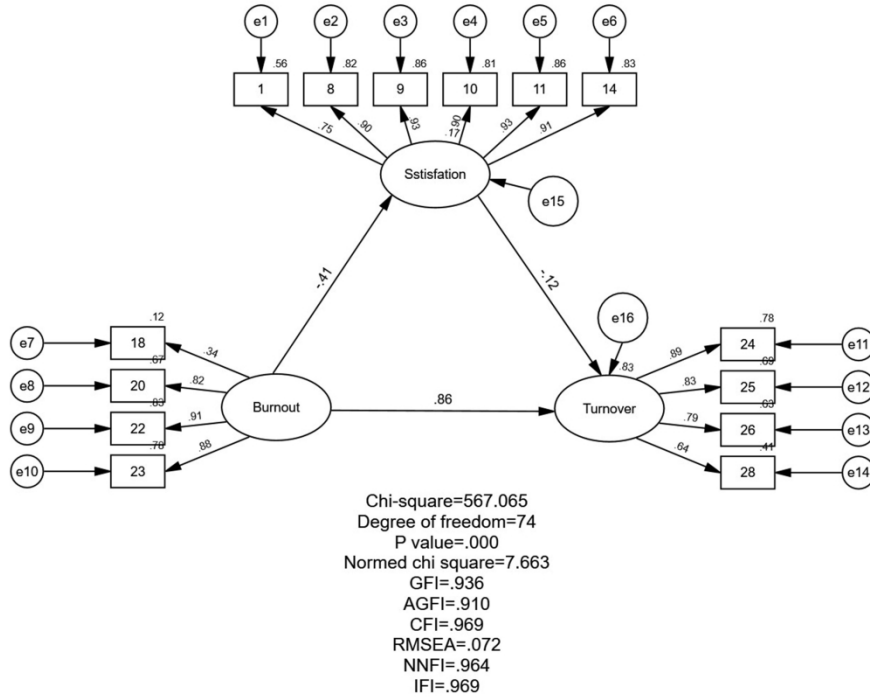

Figure 2. The structural equation modeling for the hypothetical model

370x370mm (300 x 300 DPI)

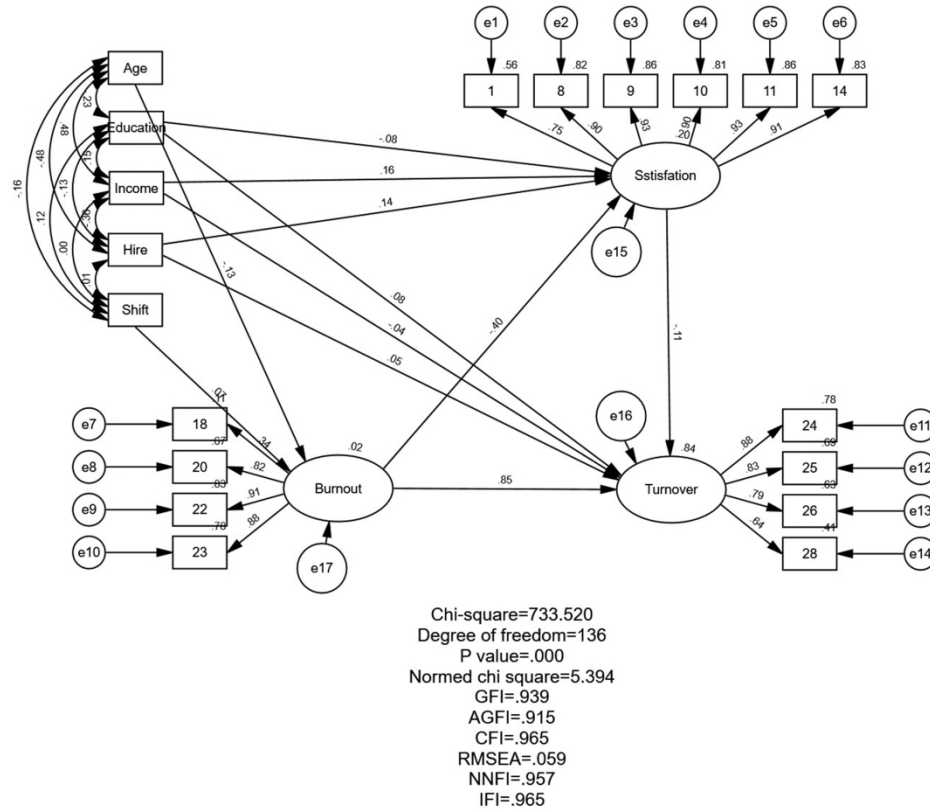

Figure 3. The structural equation modeling after introducing demographic characteristic

370x370mm (300 x 300 DPI)

Dear medical staff,

Attention, please! We are students at Wuhan University. To realize the job burnout, job satisfaction, and turnover intention of medical staff, and provide a reference for administration, we sincerely invite you to conduct a questionnaire survey. This research will not harm your health and will not affect your current work. All your information will be treated in strict confidence and kept by the investigator. There are 41 questions in the questionnaire. Please answer the questions based on real conditions.

Thank you for your active participation again!

Q1 Would you like to participate in this survey?      yes       no

If yes, please fill in the following question. If no, the investigation ends.

Q2 Hospital Name: \_\_\_\_\_

Q3 Gender:    male     female

Q4 Age: \_\_\_\_\_ years

Q5 Educational level:    Junior school and below     High school/Technical school   
                                         Junior college degree     Undergraduate degree and above

Q6 Marital status:    Married     Unmarried     Divorced/Widowed

Q7 Occupation:    Physician     Nurse     Specialists in laboratory medicine   
                                         Public health physician     Pharmacist

Q8 Technical post title:    No title     Junior title   
                                         Intermediate title     Senior title

Q9 Monthly income (RMB):    ≤2000     2001-3000     3001-4000   
                                         4001-5000     ≥5001

Q10 Hire from:    Personnel agent staff     Permanent staff   
                                         Contract staff     Temporary staff

Q11 Working time (hours per week): \_\_\_\_\_

Q12 Working years: \_\_\_\_\_

Q13 Night shift (per week):    0     1-3     >3

#### About job satisfaction:

Q14 I feel comfortable about the working environment (office environment, virescence, light, ventilation, et.): [item 1]

Very dissatisfied     Dissatisfied     Average     Satisfied     Very satisfied

Q15 Sufficient technical equipment (professional information inquiry resources, instruments, etc.) for work use: [item 2]

Very dissatisfied     Dissatisfied     Average     Satisfied     Very satisfied

Q16 Harmonious interpersonal relationship (between superiors and subordinates): [item 3]

Very dissatisfied     Dissatisfied     Average     Satisfied     Very satisfied

Q17 Good cooperation between different departments: [item 4]

Very dissatisfied     Dissatisfied     Average     Satisfied     Very satisfied

Q18 The atmosphere is good: [item 5]

Very dissatisfied     Dissatisfied     Average     Satisfied     Very satisfied

Q19 The leadership is good: [item 6]

- 1  
2  
3 Very dissatisfied  Dissatisfied  Average  Satisfied  Very satisfied   
4 Q20 I am satisfied with current income level: [item 7]  
5 Very dissatisfied  Dissatisfied  Average  Satisfied  Very satisfied   
6 Q21 I am satisfied with the welfare: [item 8]  
7 Very dissatisfied  Dissatisfied  Average  Satisfied  Very satisfied   
8 Q22 I am satisfied with the prospect of my job: [item 9]  
9 Very dissatisfied  Dissatisfied  Average  Satisfied  Very satisfied   
10 Q23 I am satisfied with the training and learning opportunities offered (frequency, form,  
11 and content): [item 10]  
12 Very dissatisfied  Dissatisfied  Average  Satisfied  Very satisfied   
13 Q24 The income distribution is reasonable: [item 11]  
14 Very dissatisfied  Dissatisfied  Average  Satisfied  Very satisfied   
15 Q25 The performance reward mechanism is reasonable: [item 12]  
16 Very dissatisfied  Dissatisfied  Average  Satisfied  Very satisfied   
17 Q26 The performance reward system has achieved good results: [item 13]  
18 Very dissatisfied  Dissatisfied  Average  Satisfied  Very satisfied   
19 Q27 The management system and business process are good: [item 14]  
20 Very dissatisfied  Dissatisfied  Average  Satisfied  Very satisfied   
21  
22  
23  
24  
25  
26  
27

#### About job burnout:

- 28  
29 Q28 I'm interested in my job: [item 15]  
30 Strongly disagree  Disagree  Average  Agree  Strongly agree   
31 Q29 I'm fit for this job: [item 16]  
32 Strongly disagree  Disagree  Average  Agree  Strongly agree   
33 Q30 I think my work is challenging: [item 17]  
34 Strongly disagree  Disagree  Average  Agree  Strongly agree   
35 Q31 My work is heavy: [item 18]  
36 Strongly disagree  Disagree  Average  Agree  Strongly agree   
37 Q32 I think my work is meaningless: [item 19]  
38 Strongly disagree  Disagree  Average  Agree  Strongly agree   
39 Q33 I can't find personal accomplishment in my job: [item 20]  
40 Strongly disagree  Disagree  Average  Agree  Strongly agree   
41 Q34 I feel exhausted: [item 21]  
42 Strongly disagree  Disagree  Average  Agree  Strongly agree   
43 Q35 I'm indifference of my job: [item 22]  
44 Strongly disagree  Disagree  Average  Agree  Strongly agree   
45 Q36 I feel anxious and fretful: [item 23]  
46 Strongly disagree  Disagree  Average  Agree  Strongly agree   
47  
48  
49  
50  
51  
52  
53

#### About turnover intention:

- 54  
55 Q37 I once thought to leave my current organization: [item 24]  
56 Strongly disagree  Disagree  Average  Agree  Strongly agree   
57 Q38 I shall likely seek a new job within the next year: [item 25]  
58 Strongly disagree  Disagree  Average  Agree  Strongly agree   
59  
60

- 1
- 2
- 3 Q39 I shall accept a new job if I have a chance: [item 26]
- 4       Strongly disagree    Disagree    Average    Agree    Strongly agree
- 5
- 6 Q40 I consider that the employment situation is favorable: [item 27]
- 7       Strongly disagree    Disagree    Average    Agree    Strongly agree
- 8
- 9 Q41 I can find a good job: [item 28]
- 10       Strongly disagree    Disagree    Average    Agree    Strongly agree
- 11

12 **Thank you for your participation!**

13

14

15 Survey date: \_\_\_\_Y/\_\_\_\_M/\_\_\_\_D

16 Questionnaire coding: \_\_\_\_\_

17

18

19

20

21

22

23

24

25

26

27

28

29

30

31

32

33

34

35

36

37

38

39

40

41

42

43

44

45

46

47

48

49

50

51

52

53

54

55

56

57

58

59

60

For peer review only



## STROBE Statement—checklist of items that should be included in reports of observational studies

|                              | Item No | Recommendation                                                                                                                                                                                                                                                                                                                                                                                                                                                         | Page No |
|------------------------------|---------|------------------------------------------------------------------------------------------------------------------------------------------------------------------------------------------------------------------------------------------------------------------------------------------------------------------------------------------------------------------------------------------------------------------------------------------------------------------------|---------|
| <b>Title and abstract</b>    | 1       | (a) Indicate the study's design with a commonly used term in the title or the abstract                                                                                                                                                                                                                                                                                                                                                                                 | 2       |
|                              |         | (b) Provide in the abstract an informative and balanced summary of what was done and what was found                                                                                                                                                                                                                                                                                                                                                                    | 2       |
| <b>Introduction</b>          |         |                                                                                                                                                                                                                                                                                                                                                                                                                                                                        |         |
| Background/rationale         | 2       | Explain the scientific background and rationale for the investigation being reported                                                                                                                                                                                                                                                                                                                                                                                   | 4-6     |
| Objectives                   | 3       | State specific objectives, including any prespecified hypotheses                                                                                                                                                                                                                                                                                                                                                                                                       | 5       |
| <b>Methods</b>               |         |                                                                                                                                                                                                                                                                                                                                                                                                                                                                        |         |
| Study design                 | 4       | Present key elements of study design early in the paper                                                                                                                                                                                                                                                                                                                                                                                                                | 6       |
| Setting                      | 5       | Describe the setting, locations, and relevant dates, including periods of recruitment, exposure, follow-up, and data collection                                                                                                                                                                                                                                                                                                                                        | 6       |
| Participants                 | 6       | (a) <i>Cohort study</i> —Give the eligibility criteria, and the sources and methods of selection of participants. Describe methods of follow-up<br><i>Case-control study</i> —Give the eligibility criteria, and the sources and methods of case ascertainment and control selection. Give the rationale for the choice of cases and controls<br><i>Cross-sectional study</i> —Give the eligibility criteria, and the sources and methods of selection of participants | 6       |
|                              |         | (b) <i>Cohort study</i> —For matched studies, give matching criteria and number of exposed and unexposed<br><i>Case-control study</i> —For matched studies, give matching criteria and the number of controls per case                                                                                                                                                                                                                                                 | N/A     |
| Variables                    | 7       | Clearly define all outcomes, exposures, predictors, potential confounders, and effect modifiers. Give diagnostic criteria, if applicable                                                                                                                                                                                                                                                                                                                               | 6-7     |
| Data sources/<br>measurement | 8*      | For each variable of interest, give sources of data and details of methods of assessment (measurement). Describe comparability of assessment methods if there is more than one group                                                                                                                                                                                                                                                                                   | 6-7     |
| Bias                         | 9       | Describe any efforts to address potential sources of bias                                                                                                                                                                                                                                                                                                                                                                                                              | N/A     |
| Study size                   | 10      | Explain how the study size was arrived at                                                                                                                                                                                                                                                                                                                                                                                                                              | N/A     |
| Quantitative variables       | 11      | Explain how quantitative variables were handled in the analyses. If applicable, describe which groupings were chosen and why                                                                                                                                                                                                                                                                                                                                           | N/A     |
| Statistical methods          | 12      | (a) Describe all statistical methods, including those used to control for confounding                                                                                                                                                                                                                                                                                                                                                                                  | 7-8     |
|                              |         | (b) Describe any methods used to examine subgroups and interactions                                                                                                                                                                                                                                                                                                                                                                                                    | 7-8     |
|                              |         | (c) Explain how missing data were addressed                                                                                                                                                                                                                                                                                                                                                                                                                            | N/A     |
|                              |         | (d) <i>Cohort study</i> —If applicable, explain how loss to follow-up was addressed<br><i>Case-control study</i> —If applicable, explain how matching of cases and controls was addressed<br><i>Cross-sectional study</i> —If applicable, describe analytical methods taking account of sampling strategy                                                                                                                                                              | N/A     |
|                              |         | (e) Describe any sensitivity analyses                                                                                                                                                                                                                                                                                                                                                                                                                                  | N/A     |

Continued on next page

1  
2  
3  
4  
5  
6  
7  
8  
9  
10  
11  
12  
13  
14  
15  
16  
17  
18  
19  
20  
21  
22  
23  
24  
25  
26  
27  
28  
29  
30  
31  
32  
33  
34  
35  
36  
37  
38  
39  
40  
41  
42  
43  
44  
45  
46  
47  
48  
49  
50  
51  
52  
53  
54  
55  
56  
57  
58  
59  
60**Results**

|                  |     |                                                                                                                                                                                                              |      |
|------------------|-----|--------------------------------------------------------------------------------------------------------------------------------------------------------------------------------------------------------------|------|
| Participants     | 13* | (a) Report numbers of individuals at each stage of study—eg numbers potentially eligible, examined for eligibility, confirmed eligible, included in the study, completing follow-up, and analysed            | 6, 8 |
|                  |     | (b) Give reasons for non-participation at each stage                                                                                                                                                         | N/A  |
|                  |     | (c) Consider use of a flow diagram                                                                                                                                                                           |      |
| Descriptive data | 14* | (a) Give characteristics of study participants (eg demographic, clinical, social) and information on exposures and potential confounders                                                                     | 8    |
|                  |     | (b) Indicate number of participants with missing data for each variable of interest                                                                                                                          | N/A  |
|                  |     | (c) <i>Cohort study</i> —Summarise follow-up time (eg, average and total amount)                                                                                                                             | N/A  |
| Outcome data     | 15* | <i>Cohort study</i> —Report numbers of outcome events or summary measures over time                                                                                                                          | N/A  |
|                  |     | <i>Case-control study</i> —Report numbers in each exposure category, or summary measures of exposure                                                                                                         | N/A  |
|                  |     | <i>Cross-sectional study</i> —Report numbers of outcome events or summary measures                                                                                                                           | 8    |
| Main results     | 16  | (a) Give unadjusted estimates and, if applicable, confounder-adjusted estimates and their precision (eg, 95% confidence interval). Make clear which confounders were adjusted for and why they were included | 9    |
|                  |     | (b) Report category boundaries when continuous variables were categorized                                                                                                                                    | N/A  |
|                  |     | (c) If relevant, consider translating estimates of relative risk into absolute risk for a meaningful time period                                                                                             | N/A  |
| Other analyses   | 17  | Report other analyses done—eg analyses of subgroups and interactions, and sensitivity analyses                                                                                                               | N/A  |

**Discussion**

|                  |    |                                                                                                                                                                            |      |
|------------------|----|----------------------------------------------------------------------------------------------------------------------------------------------------------------------------|------|
| Key results      | 18 | Summarise key results with reference to study objectives                                                                                                                   | 8-10 |
| Limitations      | 19 | Discuss limitations of the study, taking into account sources of potential bias or imprecision. Discuss both direction and magnitude of any potential bias                 | 12   |
| Interpretation   | 20 | Give a cautious overall interpretation of results considering objectives, limitations, multiplicity of analyses, results from similar studies, and other relevant evidence | 12   |
| Generalisability | 21 | Discuss the generalisability (external validity) of the study results                                                                                                      | 11   |

**Other information**

|         |    |                                                                                                                                                               |     |
|---------|----|---------------------------------------------------------------------------------------------------------------------------------------------------------------|-----|
| Funding | 22 | Give the source of funding and the role of the funders for the present study and, if applicable, for the original study on which the present article is based | N/A |
|---------|----|---------------------------------------------------------------------------------------------------------------------------------------------------------------|-----|

\*Give information separately for cases and controls in case-control studies and, if applicable, for exposed and unexposed groups in cohort and cross-sectional studies.

**Note:** An Explanation and Elaboration article discusses each checklist item and gives methodological background and published examples of transparent reporting. The STROBE checklist is best used in conjunction with this article (freely available on the Web sites of PLoS Medicine at <http://www.plosmedicine.org/>, Annals of Internal Medicine at <http://www.annals.org/>, and Epidemiology at <http://www.epidem.com/>). Information on the STROBE Initiative is available at [www.strobe-statement.org](http://www.strobe-statement.org).

# BMJ Open

## Job Burnout and Turnover Intention among Chinese Primary Healthcare Staff: The Mediating Effect of Satisfaction

|                                 |                                                                                                                                                                                                                                                                                     |
|---------------------------------|-------------------------------------------------------------------------------------------------------------------------------------------------------------------------------------------------------------------------------------------------------------------------------------|
| Journal:                        | <i>BMJ Open</i>                                                                                                                                                                                                                                                                     |
| Manuscript ID                   | bmjopen-2019-036702.R2                                                                                                                                                                                                                                                              |
| Article Type:                   | Original research                                                                                                                                                                                                                                                                   |
| Date Submitted by the Author:   | 28-Jul-2020                                                                                                                                                                                                                                                                         |
| Complete List of Authors:       | Ran, Li; Wuhan University<br>Chen, Xuyu; Wuhan University<br>Peng, Shuzhen; Huangpi People's Hospital<br>Zheng, Feng; Health Committee of Huangpi District of Wuhan<br>Tan, Xiaodong; Wuhan University; Wuchang University of Technology<br>Duan, Ruihua; Huangpi People's Hospital |
| <b>Primary Subject Heading</b>: | Health services research                                                                                                                                                                                                                                                            |
| Secondary Subject Heading:      | Health services research, Occupational and environmental medicine, Public health                                                                                                                                                                                                    |
| Keywords:                       | Health & safety < HEALTH SERVICES ADMINISTRATION & MANAGEMENT, Human resource management < HEALTH SERVICES ADMINISTRATION & MANAGEMENT, PUBLIC HEALTH                                                                                                                               |
|                                 |                                                                                                                                                                                                                                                                                     |

SCHOLARONE™  
Manuscripts



I, the Submitting Author has the right to grant and does grant on behalf of all authors of the Work (as defined in the below author licence), an exclusive licence and/or a non-exclusive licence for contributions from authors who are: i) UK Crown employees; ii) where BMJ has agreed a CC-BY licence shall apply, and/or iii) in accordance with the terms applicable for US Federal Government officers or employees acting as part of their official duties; on a worldwide, perpetual, irrevocable, royalty-free basis to BMJ Publishing Group Ltd ("BMJ") its licensees and where the relevant Journal is co-owned by BMJ to the co-owners of the Journal, to publish the Work in this journal and any other BMJ products and to exploit all rights, as set out in our [licence](#).

The Submitting Author accepts and understands that any supply made under these terms is made by BMJ to the Submitting Author unless you are acting as an employee on behalf of your employer or a postgraduate student of an affiliated institution which is paying any applicable article publishing charge ("APC") for Open Access articles. Where the Submitting Author wishes to make the Work available on an Open Access basis (and intends to pay the relevant APC), the terms of reuse of such Open Access shall be governed by a Creative Commons licence – details of these licences and which [Creative Commons](#) licence will apply to this Work are set out in our licence referred to above.

Other than as permitted in any relevant BMJ Author's Self Archiving Policies, I confirm this Work has not been accepted for publication elsewhere, is not being considered for publication elsewhere and does not duplicate material already published. I confirm all authors consent to publication of this Work and authorise the granting of this licence.

# Job Burnout and Turnover Intention among Chinese Primary Healthcare Staff: The Mediating Effect of Satisfaction

Li Ran<sup>1\*</sup>, Xuyu Chen<sup>1\*</sup>, Shuzhen Peng<sup>2</sup>, Feng Zheng<sup>3</sup>, Xiaodong Tan<sup>14#</sup>, and Ruihua  
Duan<sup>2#</sup>

## Affiliations:

<sup>1</sup> Department of Occupational and Environmental Health, School of Health Sciences, Wuhan University, Wuhan, 430071, China; Email: [celesteyien@163.com](mailto:celesteyien@163.com) (Li Ran); [5827623310@163.com](mailto:5827623310@163.com) (Xuyu Chen)

<sup>2</sup> Huangpi People's Hospital, Wuhan, 432200, China; Email: [1718274898@qq.com](mailto:1718274898@qq.com) (Shuzhen Peng)

<sup>3</sup> Health Committee of Huangpi District of Wuhan, Wuhan, 430300, China; Email: [694184610@qq.com](mailto:694184610@qq.com) (Feng Zheng)

<sup>4</sup> School of Nursing, Wuchang University of Technology, Wuhan, 430223, China.

\*These authors contributed equally to this paper.

# Address correspondence to:

**Professor Xiaodong Tan, Ph.D.**

Department of Occupational and Environmental Health, School of Health Sciences, Wuhan University, 115 Donghu Road, Wuchang District, Wuhan, 430071, P. R. China.  
Email: [whutanxiaodong@163.com](mailto:whutanxiaodong@163.com)

**Professor Ruihua Duan, Ph.D.**

Huangpi People's Hospital, 259 Baixiu Street, Huangpi District, Wuhan, 432200, P. R. China. Email: [854757230@qq.com](mailto:854757230@qq.com)

## Abstract

**Objectives:** Although China has done a lot in strengthening the primary healthcare system, the high turnover intention is still a social problem to be reckoned with. The objective of this study is to explore the mediating effect of satisfaction between job burnout and turnover intention.

**Design:** Cross-sectional study.

**Methods:** A cross-sectional study was conducted to make sense of the job burnout, satisfaction, and turnover intention among primary healthcare workers in central China. Structural equation modeling (SEM) was performed to study the mediating effect of satisfaction between job burnout and turnover intention with maximum likelihood estimation. The mediation effect test was carried out by using the bootstrap method.

**Results:** SEM showed that job burnout was positively related to the turnover intention with the standard path coefficient of 0.845 ( $C.R. = 34.055, P < 0.001$ ). The partial mediating effect of satisfaction was 0.047, making up 5.32% of the total effect. The goodness-of-fit was acceptable ( $GFI = 0.947, CFI = 0.975, RMSEA = 0.067, NNFI = 0.971, IFI = 0.975$ ). Age, education level, monthly income, hire form, and night shift were also found significantly correlated with turnover intention, and no difference was found between physicians and nurses.

**Conclusions:** The turnover intention is significantly affected by job burnout, satisfaction, and demographic characteristics including age, education level, monthly income, hire form, and night shift. Satisfaction can be regarded as a mediator between job burnout and turnover intention. Relative measures can be taken to promote enthusiasm and satisfaction thus decreasing the turnover rate.

**Keywords:** Burnout; Job Satisfaction; Turnover Intention; Mediating Effect; Healthcare

### Strengths and limitations of this study

- Structural equation modeling is adopted so that the qualitative and quantitative analyses can explore the relationship between job burnout, satisfaction, and turnover intention.
- A multiple-group analysis was conducted between the physicians and nurses guaranteeing the applicability.
- This study summarizes the influence demographic characteristics posed on the turnover intention among China's primary healthcare workers, enriching the study content.
- The reliability of structural equation modeling is repeatedly tested.
- Inability to accurately discuss the representativeness of the cross-sectional study.

## 1 Background

Health and medical personnel play a seminal role in fulfilling the healthcare needs of the entire population, therefore, a robust allocation of human resources maintains the health system running smoothly and also guarantees people accessing to healthcare priority equally [1]. Unfortunately, the current out-of-balance between healthcare staff supply and demand has challenged this priority and triggered a global problem of continual brain drain. Up to 2013, the scarcity of healthcare workers (including physicians, nurses, and midwives) worldwide was estimated at 7.2 million, and it will sharply rising to 12.9 million by 2035 [2].

As a developing country with a huge population, China's shortage of health workforce has posed one of the major obstacles to primary healthcare services. According to the *China health statistics yearbook*, there are only 0.46 pediatricians per 1,000 children, much lower than the goal number of 2.06 per 1,000 children. Equally consistent is the finding that the number of anesthesiologists per 10,000 people is less than 0.65, while the number in some developed countries in Europe is 2.5 to 3 [3]. To make matters worse, primary healthcare workers are generally confronted with the challenge of high turnover intention, which has become a social problem to be reckoned with [4]. Results of a survey show that from 2010 to 2016, the proportion of Chinese primary healthcare staff decreased from 44% to 33% [5]. Moreover, the average turnover rate of nurses in first-class tertiary hospitals is 5.8% in China, which goes up to 8-10% in economically advanced regions like Shanghai and Guangzhou [6]. Under this circumstance, the turnover intention has been an important and popular study subject in psychology and management field.

Turnover intention reflects an individual's conscious and deliberate willfulness to quit one's job or organization within a certain period, which would possibly pose a major problem in healthcare system resulting in a high turnover rate [7-9]. That is to say, the turnover intention is the strongest cognitive precursor of turnover, directly affecting the choice of departure. Because of a considerable number of predictive modeling formulas of voluntary turnover has been established, researchers generally recognized and supported that several hypothesized variables are associated with the intention to leave, involving commuting stress, emotional intelligence, job stress, job burnout, and job satisfaction [10-13]. Among the hypothesized linkages above, job burnout and satisfaction are the most common proposed antecedents.



1  
2  
3 In the late 1980s, Pines and Aronson defined job burnout as a state of physical,  
4 emotional, and mental exhaustion [14,15]. It describes the individuals' psychological  
5 response to prolonged interpersonal and chronic emotional stressors, dominantly  
6 caused by a long-term involvement in emotionally demanding situations [16]. Job  
7 burnout can be categorized into three dimensions, including emotional exhaustion,  
8 depersonalization, and the sense of reduced personalized accomplishment. Looking  
9 from the former researches, job burnout has a strong positive relationship with turnover  
10 intention whereas a negative relation with job satisfaction [17,18]. Job satisfaction  
11 encompasses employees' feelings and thoughts about various aspects of their job. In  
12 other words, job satisfaction refers to an individual's cognitive or effective evaluation  
13 of his or her occupational duties, presenting the extent people like the job and reflecting  
14 the effective judgments people hold toward their work condition [19,20]. Numerous  
15 studies have repeatedly verified that job satisfaction is inversely related to turnover and  
16 intent to leave. In addition to direct effects, we propose that job satisfaction serves as a  
17 mediator through which job burnout affects turnover intention as well. Yet, there is still  
18 a lack of literature supporting our hypothesis, hence, it is necessary to conduct this study  
19 to make up the gap.

20  
21  
22 Taken together, the theoretical framework utilized in this study originated from  
23 researches suggesting that turnover intention maybe both related to satisfaction and  
24 burnout toward the job. Accordingly, we hypothesized that:

25  
26  
27 H1: Job burnout is positively related to turnover intention.

28  
29  
30 H2: Job satisfaction is negatively related to turnover intention.

31  
32  
33 H3: Job satisfaction is negatively related to job burnout.

34  
35  
36 H4: Job satisfaction has a mediating effect between job burnout and turnover intention.

37  
38  
39 As shown in Figure 1, we tested this theoretical model with the data from primary  
40 healthcare staff in central China to explore the mediating effect of satisfaction.

## 41 42 43 **2 Methods**

### 44 45 46 **2.1 Design and Sample**

47  
48  
49 In this investigation, we utilized survey research methods to make sense of the job  
50 burnout, satisfaction, and turnover intention of primary healthcare staff. From March to  
51 May 2019, a cross-sectional study was conducted in Huangpi District of Wuhan in  
52 central China. The sample size was estimated with the average detection rate of burnout  
53 in China with the equation:  $n = Z_{(\alpha/2)}^2 \times p \times (1 - p) / \delta^2$ , where  $\alpha$  is 0.05,  $\delta$  is 0.08, and

*p* is 55%. To compensate for the non-response rate, the sample was increased by 10% with a final sample size of 540. Participants involved met the following inclusion criteria: ① working for at least 6 months; ② did not have a mental illness or obstacle in communication; and ③ volunteered to participate in the survey. All participants were recruited face-to-face from 29 primary health care institutions in Huangpi District by our research group. Participants fulfilled electronic questionnaires with a mobile application or they orally answered questions and the results were synchronously typed in. The study data was anonymous to protect privacy. Ethical approval for this study was granted by the Research Ethics Boards of Wuhan University, and informed consent was obtained. The questionnaire comprised following sections: sociodemographic information, job satisfaction, job burnout, and turnover intention. (See detail in Appendix)

## **2.2 Methods of Measurement**

### **2.2.1 Job Satisfaction**

On the bases of the local actual condition, we collected the job satisfaction information utilizing an adjusted satisfaction scale. The adjusted scale referred for the Minnesota Satisfaction Questionnaire (MSQ) [21], Job Satisfaction Survey (JSS) [22], and Job Descriptive Index (JDI) [23], including 14 items (item 1 to 14) about the satisfaction with the internal environment, external environment, remunerations, management, and work itself. Participants responded to a 5-point Likert scale ranging from 1 point (the most unsatisfaction) to 5 points (the most satisfaction). A higher score indicates a higher satisfaction.

### **2.2.2 Job Burnout**

The information on participants' job burnout was gathered with an adjusted 5-point Likert burnout scale according to the Maslach Burnout Inventory-General Survey (MBI-GS) developed by Maslach and Jackson [24]. Several emotion-related items were used to describe participants' burnout experience, including "I'm interested in my job" (item 15, reverse coded), "I'm fit for this job" (item 16, reverse coded), "I think my work is challenging" (item 17), "My work is heavy" (item 18), "I think my work is meaningless" (item 19), "I can't find personal accomplishment in my job" (item 20), "I feel exhausted" (item 21), "I'm indifference of my job" (item 22), and "I feel anxious and fretful" (item 23). A higher score indicates a greater propensity for job burnout.

### 2.2.3 Turnover Intention

The turnover intention was similarly measured with an adjusted scale concerning several plan-related items. The adjusted scale referred for a six-item version of the turnover intention scale (TIS-6) explored by Griffeth [25]. The items include “I once thought to leave my current organization” (item 24), “I shall likely seek a new job within the next year” (item 25), “I shall accept a new job if I have a chance” (item 26), “I consider that the employment situation is favorable” (item 27), and “I can find a good job” (item 28). The above items were evaluated with a 5-point Likert scale, where 1 represents strongly disagree, 2 represents disagree, 3 represents slightly disagree, 4 represents agree, and 5 represents strongly agree.

## 2.3 Statistical Analysis

All statistical analyses and hypothesis testing were performed using SPSS version 22.0 and AMOS version 21.0, with two-sided tests. In the first stage, an empirical study was processed to optimize items in each scale, including discrimination tests and collinearity diagnostics. Then, an exploratory factor analysis (EFA), confirmatory factor analysis (CFA), and a Cronbach’s alpha coefficient method were applied to check the discriminant validity and reliability of above-mentioned scales. In the next stage, the Pearson product-moment correlation coefficients were calculated to analyze the correlations between variables. Last, the effect of job burnout on turnover intention via satisfaction was examined using a structural equation modeling (SEM) with maximum likelihood estimation. The mediation effect test was carried out by using the bootstrap method. The goodness-of-fit of the model was evaluated with chi-square statistic, the goodness of fit index (GFI), the comparative fit index (CFI), the root mean square error of approximation (RMSEA), the non-normed fit index (NNFI), and the incremental fit index (IFI). The model fitted well when  $GFI > 0.90$ ,  $CFI > 0.90$ ,  $RMSEA < 0.05$ ,  $NNFI > 0.90$ , and  $IFI > 0.90$ .

## 2.4 Patient and public involvement

Participants were not involved in development of the research question and outcome measures, study design or conduct of this study.

# 3 Results

## 3.1 Profile of Sample

A total of 1300 electronic questionnaires were sent out, and 1279 eligible participants

1  
2  
3 left after deleting those with uncompleted or suspected unreal answers. The effective  
4 rate is 98.38%. As shown in Table 1, over half of the participants (66.50%) were female;  
5 79.12% were married; 43.55% were physicians and 41.83% were nurses; 63.02%  
6 earned 2001-4000 Chinese Renminbi (RMB, US \$ 290.97-581.65) per month. The most  
7 frequent occupational title was junior tile (accounting for 46.76%) and the most  
8 frequent education level was separately undergraduate degree and above (accounting  
9 for 47.46%) and junior college degree (accounting for 37.06%). The prevalence rate of  
10 satisfaction, job burnout, and turnover intention was separately 79.99%, 18.69%, and  
11 26.04%. The median (range) score of satisfaction, job burnout, and turnover intention  
12 was 52 (13-65), 22 (9-37), and 12 (5-25).

## 20 **3.2 Tests of the Hypothetical Model**

### 21 **3.2.1 Reliability and Validity Analysis**

22  
23 Before reliability analysis and validity analysis, we applied discrimination tests and  
24 collinearity diagnostics to filter optimal items. Although the adjusted satisfaction scale  
25 yields high indices of discrimination, there exists strong collinearity from item 1 to item  
26 7, item 12, and item 13. After all comprehensive considerations, we deleted relative  
27 items except item 1. The Cronbach's  $\alpha$  of this scale reaches 0.956, indicating  
28 satisfactory reliability. Moreover, the modified scale construction  
29 is effective measuring by EFA (Kaiser-Meyer-Olkin = 0.928,  $P < 0.001$ ) and suitable  
30 for CFA. The model finally fit the data acceptably ( $\chi^2/df = 7.889$ ,  $GFI = 0.986$  ~~0.973~~,  
31  $CFI = 0.994$ ,  $RMSEA = 0.073$ ,  $NNFI = 0.994$ ,  $IFI = 0.994$ ).

32  
33 In the adjusted burnout scale, we omitted the items from 15 to 17, 19, and 21 because  
34 of a low distinguishability in discriminant analysis. Cronbach's  $\alpha$  of this scale was  
35 increasing to 0.802. Besides, the adjusted burnout also has a good validity conducted  
36 by EFA and CFA ( $\chi^2/df = 8.395$ ,  $GFI = 0.993$ ,  $CFI = 0.994$ ,  $RMSEA = 0.076$ ,  $NNFI =$   
37  $0.994$ ,  $IFI = 0.994$ ).

38  
39 Similar in the adjusted turnover intention scale, item 27 was removed. The  
40 Cronbach's  $\alpha$  coefficient for the remaining 4 items ( $\alpha = 0.865$ ) indicated good internal  
41 consistency reliability. And the validity is acceptable ( $\chi^2/df = 6.889$ ,  $GFI = 0.948$ ,  $CFI =$   
42  $0.973$ ,  $RMSEA = 0.067$ ,  $NNFI = 0.969$ ,  $IFI = 0.973$ ).

### 43 **3.2.2 Correlation Analysis**

44  
45 Table 2 demonstrates the means, standard deviations, and correlation coefficients  
46 among three dimensions of job satisfaction, burnout, and turnover intention. As is  
47  
48  
49  
50  
51  
52  
53  
54  
55  
56  
57  
58  
59  
60

1  
2  
3 indicated that job satisfaction has both a significant negative relation with turnover  
4 intention ( $r = -0.414, P < 0.001$ ) and job burnout ( $r = -0.387, P < 0.001$ ). Job burnout  
5 showed a significant positive correlation with turnover intention ( $r = 0.797, P < 0.001$ ).  
6  
7

### 8 **3.2.3 Structural Equation Model**

9  
10 As can be seen in Figure 2 and Table 3, three latent variables in the model were  
11 significantly intercorrelated. The standardized path coefficient of path a (Job burnout  
12  $\rightarrow$  Satisfaction), b (Satisfaction  $\rightarrow$  Turnover intention), and c' (Job burnout  $\rightarrow$  Turnover  
13 intention) was respectively -0.409 (C.R. = -14.298,  $P < 0.001$ ), -0.116 (C.R. = -6.023,  
14  $P < 0.001$ ), and 0.845 (C.R. = 34.055,  $P < 0.001$ ). Higher standardized path coefficients  
15 suggest stronger correlations, with values over 0.200 considered very correlated. Taken  
16 path a as an example, it means that for each one standard deviation decreases in the job  
17 burnout, the change in satisfaction will increase by 0.409 standard deviation. The  
18 mediating effect of satisfaction was significant ( $P < 0.001$ ) with the path coefficient of  
19 0.047, making up 5.32% of the total effect (proportion =  $a \times b/c$ ,  $0.409 \times 0.116/0.892$   
20 = 0.053). The hypothetical model yields satisfactory values ( $GFI = 0.947, CFI = 0.975,$   
21  $RMSEA = 0.067, NNFI = 0.971, IFI = 0.975$ ), indicating credible data fit.  
22  
23

24 Variables such as age, education, income, etc. were introduced in the model to further  
25 research on the influences. Figure 3 illustrates the standardized path coefficient between  
26 each variable. Educational level, monthly income, and hire form showed a direct ( $r =$   
27 0.084, -0.037, 0.048 respectively) and indirect ( $r = -0.008, -0.018, -0.015$  respectively)  
28 effect on turnover intention. Also, age and night shift could affect turnover intention  
29 through job burnout with the standard path coefficient of -0.111 and 0.062. This model  
30 also showed a good fit to the data:  $GFI = 0.947, CFI = 0.971, RMSEA = 0.054, NNFI$   
31 = 0.963,  $IFI = 0.971$ .  
32  
33

34 To further deal with the stability of the model, a multiple-group analysis was  
35 conducted between physicians and nurses. Table 4 summarizes the testing for invariant  
36 factorial structure between physicians and nurses. The  $P$  values of the model of  
37 measurement weights and structural weights were separately 0.35 and 0.39, confirming  
38 the stability. Although  $P$  values were lower than 0.05 in the model of structural  
39 covariances, structural residuals, and measurement residuals, incredibly small  
40 variations were presented in indices of fit (all variations change  $< 0.05$ ). Therefore, the  
41 model can be regarded as stable in physicians and nurses.  
42  
43  
44  
45  
46  
47  
48  
49  
50  
51  
52  
53  
54  
55  
56  
57  
58  
59  
60

## 4 Discussion

This study was conducted to investigate the mediating effect of job satisfaction in the relationship between job burnout and turnover intention among primary medical staff in Huangpi District where the medical resources and clinical ability represent the averaged level in China. Through it, we confirmed the direct influence of job burnout and satisfaction drew on the turnover intention and the mediating effect of satisfaction. Our study additionally demonstrated that the prevalence rate of job burnout and turnover intention was respectively 18.69% and 26.04%. The results are quite consistent with previous researches in China [26,27].

In line with earlier studies, our results recognized that job burnout positively predicted turnover intention with an explanatory power of 94.73% [28,29]. For job burnout and its four latent measures, “no personal accomplishment”, “indifference”, and “anxious and fretful” show a strong correlation with burnout except for “a heavy work”. It is generally believed that burnout is intrinsically related to work factors and secondly to personality factors [30]. Hence, hospital managers must think about the role conflict and the way to solve emotional exhaustion and reduced personalized accomplishment. Our results also found that satisfaction could directly or indirectly affect turnover intention with a relatively limited effect. This finding helps to illuminate the relations between burnout, satisfaction, and turnover that were not apparent before, as most previous studies focused on satisfaction’s direct impact on turnover instead of a mediator [31,32]. Seen from the partial mediating effect of satisfaction, job burnout, to a very small degree, would increase the turnover tendency by reducing the satisfaction levels. That is to say, the fundamental reason for turnover tendency is job burnout while only 5.32% is related to low satisfaction. Therefore, the improvement of working conditions, welfares, advanced-learning opportunities, and reward mechanisms is worthy of concern but limited effect. The effective ways to solve this problem are to understand how burnout generates, focus on staff’s physical and mental changes, and do in science.

Apart from it, the turnover intention was noted to be affected by age, education level, monthly income, hire form, and night shift directly or through the mediators of satisfaction and burnout in our study. This influence shows no difference between physicians and nurses. Primary healthcare institutions generally play an essential role in medical providing and safeguarding among the broadest masses of people. In past

1  
2  
3 decades, the medical quality and service standard in primary medical institutions was  
4 continually enhanced with the in-depth development of national medical and health  
5 system reform. But most of the basic healthcare staff in China still encounter low  
6 salaries, less independence, insufficient social support, and few promotion prospects,  
7 which could lead to job burnout, unsatisfaction even turnover [33,34]. To fully utilize  
8 health resources and to improve the healthcare system's overall social impacts,  
9 governments and concerned departments should emphasize more attention to optimize  
10 medical resources allocation [35]. Under market economy conditions, public hospital  
11 managers should also establish and consummate hospital operation and management  
12 systems. As an occupation with high risk, pressure, and skill, healthcare staffs deserve  
13 a high payment. However, there is a huge income gap between China and developed  
14 countries [36]. The average monthly salary of Chinese health workers in 2017 was  
15 about 6669 RMB (approximately \$ 969.54) [37]. It is necessary to adopt a reasonable  
16 mechanism of performance incentive and financial management, to regulate and  
17 optimize nigh-shift works, and to set up a good academic atmosphere at the same time.  
18 Besides, more focuses need to raise on healthcare providers' psychological states,  
19 especially those youth with high educational background and academic qualification.  
20 In this way, the employee's motivation and enthusiasm could be improved to some  
21 extent.  
22  
23  
24  
25  
26  
27  
28  
29  
30  
31  
32  
33  
34  
35

36 Although this study contributes to the knowledge base of the turnover intention  
37 related to job burnout and satisfaction, it does have several limitations. First, causal  
38 relationships among turnover, burnout, and satisfaction should be cautiously interpreted  
39 as this is a cross-sectional study. Second, despite the credible reliability and validity,  
40 the scales we used were adjusted based on the existing general scales. Hence, it needs  
41 to be tested and replicated with additional researches. Third, other potential predictors  
42 such as work stress, social support, and mental health were not captured in our  
43 questionnaire. We will continue this study in the future to overcome the shortages.  
44  
45  
46  
47  
48  
49

## 50 **5 Conclusion**

51 The current findings indicate a positive association between job burnout and turnover  
52 intention, while a negative relation between job burnout and satisfaction, as well as  
53 satisfaction and turnover intention. Also, satisfaction can be regarded as a mediator  
54 between job burnout and turnover intention, whose partial mediating effect is 5.32%.  
55 Age, education level, monthly income, hire form, and night shift also influence the  
56  
57  
58  
59  
60

turnover intention, hence, relative measures can be taken to promote enthusiasm and satisfaction thus decreasing the turnover rate.

## Abbreviations

**MSQ:** Minnesota Satisfaction Questionnaire, **JSS:** Job Satisfaction Survey, **JDI:** Job Descriptive Index, **MBI-GS:** Maslach Burnout Inventory-General Survey, **EFA:** exploratory factor analysis, **CFA:** confirmatory factor analysis, **SEM:** structural equation modeling, **GFI:** the goodness of fit index, **CFI:** the comparative fit index, **RMSEA:** the root mean square error of approximation, **NNFI:** the non-normed fit index, **IFI:** the incremental fit index.

## Figure legends

Figure 1. Hypothesized model of burnout, satisfaction, and turnover intention

Figure 2. The structural equation modeling for the hypothetical model

Figure 3. The structural equation modeling after introducing demographic characteristic

## Acknowledgements

Here we are thankful to all the healthcare staff participated in this study. We are also grateful to all the investigators for collecting and calculating data.

## Contributors

Conceived and designed this paper: Li Ran. Wrote this paper: Li Ran. Calculated data: Li Ran, Xuyu Chen, Shuzhen Peng, and Feng Zheng. Performed the study and collected data: Xuyu Chen and Li Ran. Provided with analysis tools: Professor Xiaodong Tan. Mended and approved the final version: Professor Xiaodong Tan and Ruihua Duan.

## Funding

This research did not receive any specific grant from funding agencies in the public, commercial, or not-for-profit sectors.

## Ethics approval and consent to participate

Ethical approval for this study was granted by the Research Ethics Boards of Wuhan University (No.2018YF0080). Informed consent was obtained from all survey participants.

## Competing interests

The authors declare that they have no competing interests.



1  
2  
3 **Patient consent for publication**  
4

5 Not required.  
6

7 **Data sharing statement**  
8

9 Data may be made available by contacting the corresponding author.  
10  
11  
12  
13  
14  
15  
16  
17  
18  
19  
20  
21  
22  
23  
24  
25  
26  
27  
28  
29  
30  
31  
32  
33  
34  
35  
36  
37  
38  
39  
40  
41  
42  
43  
44  
45  
46  
47  
48  
49  
50  
51  
52  
53  
54  
55  
56  
57  
58  
59  
60

For peer review only

**References:**

- [1] D. Feng, S. Su, Y. Yang, J. Xia, Y. Su, "Job satisfaction mediates subjective social status and turnover intention among Chinese nurses," *Nursing & Health Sciences*, vol. 19, no. 3, pp. 388, 2017.
- [2] M. Marć, A. Bartosiewicz, J. Burzyńska, Z. Chmiel, P. Januszewicz, "A nursing shortage – a prospect of global and local policies," *INTERNATIONAL NURSING REVIEW*, vol. 66, no. 1, pp. 9-16, 2019.
- [3] E. Wang, "Requests for cesarean deliveries: The politics of labor pain and pain relief in Shanghai, China," *SOCIAL SCIENCE & MEDICINE*, vol. 173, pp. 1-8, 2017.
- [4] X. Li, J. Lu, S. Hu, et al, "The primary health-care system in China," *The Lancet*, vol. 390, no. 10112, pp. 2584-2594, 2017.
- [5] H. Li, B. Yuan, D. Wang, Q. Meng, "Motivating factors on performance of primary care workers in China: a systematic review and meta-analysis," *BMJ Open*, vol. 9, pp. e28619, 2019.
- [6] Q. Du, Y. Li, Z. Shi, "Application of performance management in the nurses overall quality of quantitative management," *Chinese Journal of Modern Nursing*, vol. 19, no. 27, pp. 3407-3409, 2013.
- [7] J. P. Meyer and N. J. Allen, "A Three-Component Model Conceptualization of Organizational Commitment," *HUMAN RESOURCE MANAGEMENT REVIEW*, vol. 78, no. 1, pp. 61-89, 2016.
- [8] Y. H. Lee and P. Chelladurai, "Emotional intelligence, emotional labor, coach burnout, job satisfaction, and turnover intention in sport leadership," *European Sport Management Quarterly*, vol. 18, no. 4, pp. 393-412, 2018.
- [9] A. Sousa-Poza and F. Henneberger, "Analyzing Job Mobility with Job Turnover Intentions: An International Comparative Study," *JOURNAL OF ECONOMIC ISSUES*, vol. 38, no. 1, pp. 113-137, 2004.
- [10] K. Amponsah-Tawiah, F. Annor, B. G. Arthur, "Linking commuting stress to job satisfaction and turnover intention: The mediating role of burnout," *Journal of Workplace Behavioral Health*, vol. 31, no. 2, pp. 104-123, 2016.
- [11] L. F. Yang, J. Y. Liu, Y. H. Liu, "Job burnout and turnover intention among nurses in China: the mediating effects of positive emotion," *Chinese Nursing Research*, vol. 5, no. 1, pp. 43-47, 2018.

- 1  
2  
3 [12]E. Hong and Y. S. Lee, "The mediating effect of emotional intelligence between  
4 emotional labour, job stress, burnout and nurses' turnover intention," *International*  
5 *Journal of Nursing Practice*, vol. 22, no. 6, pp. 625-632, 2016.  
6  
7  
8 [13]H. L. Ye and P. Chelladurai, "Emotional intelligence, emotional labor, coach  
9 burnout, job satisfaction, and turnover intention in sport leadership," *European*  
10 *Sport Management Quarterly*, vol., pp. 1-20, 2017.  
11  
12 [14]A. Pavlakis, V. Raftopoulos, M. Theodorou, "Burnout syndrome in Cypriot  
13 physiotherapists: a national survey," *BMC HEALTH SERVICES RESEARCH*, vol.  
14 10, no. 1, pp. 1-8, 2010.  
15  
16 [15]A. M. Pines, "Marriage burnout: A new conceptual framework for working with  
17 couples.," *Psychotherapy in Private Practice*, vol. 5, no. 2, pp. 31-44, 1987.  
18  
19 [16]H. Kroll, T. Macaulay, M. Jesse, "A preliminary survey examining predictors of  
20 burnout in pain medicine physicians in the United States," *Pain Physician*, vol. 19,  
21 no. 5, pp. E689, 2016.  
22  
23 [17]C. A. Wong and H. K. S. Laschinger, "The Influence of Frontline Manager Job  
24 Strain on Burnout, Commitment and Turnover Intention: A Cross-sectional Study,"  
25 *INTERNATIONAL JOURNAL OF NURSING STUDIES*, vol. 52, no. 12, pp. 1824-  
26 1833, 2015.  
27  
28 [18]A. C. C. Lu and D. Gursoy, "Impact of Job Burnout on Satisfaction and Turnover  
29 Intention: Do Generational Differences Matter?" *Journal of Hospitality & Tourism*  
30 *Research*, vol. 40, no. 2, pp. 210-235, 2016.  
31  
32 [19]H. Samadi Miarkolaei and H. Samadi Miarkolaei, "An investigation on relationship  
33 between employees ' job satisfaction and organizational commitment,"  
34 *Management Science Letters*, vol. 4, no. 4, pp. 669-678, 2014.  
35  
36 [20]T. Aldrees, S. Al-Eissa, M. Badri, A. Aljuhayman, M. Zamakhshary, "Physician  
37 job satisfaction in Saudi Arabia: insights from a tertiary hospital survey," *ANNALS*  
38 *OF SAUDI MEDICINE*, vol. 35, no. 3, pp. 210, 2015.  
39  
40 [21]D. J. Weiss, R. V. Dawis, G. W. England, "Manual for the Minnesota Satisfaction  
41 Question," *Minnesota Studies in Vocational Rehabilitation*, vol. 22, pp.1967.  
42  
43 [22]T. Andreas and S. Pavlos, "Validity and reliability of the Greek translation of the  
44 Job Satisfaction Survey (JSS)," *Bmc Psychology*, vol. 6, no. 1, pp. 27, 2018.  
45  
46 [23]S. Lopes, M. J. Chambel, F. Castanheira, F. Oliveira-Cruz, "Measuring job  
47 satisfaction in Portuguese military sergeants and officers: Validation of the Job  
48  
49  
50  
51  
52  
53  
54  
55  
56  
57  
58  
59  
60

- 1  
2  
3 Descriptive Index and the Job in General scale.," *MILITARY PSYCHOLOGY*, vol.  
4 27, no. 1, pp. 52-63, 2015.
- 5  
6  
7 [24]N. Schutte, S. Toppinen, R. Kalimo, W. Schaufeli, "The factorial validity of the  
8 Maslach Burnout Inventory - General Survey (MBI - GS) across occupational  
9 groups and nations," *Journal of Occupational & Organizational Psychology*, vol.  
10 73, no. 1, pp. 53-66, 2011.
- 11  
12  
13 [25]C. F. C. Bothma and G. Roodt, "The validation of the turnover intention scale,"  
14 *South African Journal of Human Resource Management*, vol., pp.2013.
- 15  
16  
17 [26]Y. Gan, H. Jiang, L. Li, et al, "Prevalence of burnout and associated factors among  
18 general practitioners in Hubei, China: a cross-sectional study," *BMC PUBLIC*  
19 *HEALTH*, vol. 19, no. 1, pp. 1607, 2019.
- 20  
21  
22 [27]Y. Mao, H. Rongxin, J. Liu, N. Zhang, B. Zhu, "Turnover intention of primary  
23 health workers in China: a systematic review," *The Lancet*, vol. 392, pp. S17, 2018.
- 24  
25  
26 [28]L. F. Yang, J. Y. Liu, Y. H. Liu, "Job burnout and turnover intention among nurses  
27 in China:the mediating effects of positive emotion," *Chinese Nursing Research*,  
28 vol. 5, no. 1, pp. 43-47, 2018.
- 29  
30  
31 [29]K. Amponsah-Tawiah, F. Annor, B. G. Arthur, "Linking commuting stress to job  
32 satisfaction and turnover intention: The mediating role of burnout," *Journal of*  
33 *Workplace Behavioral Health*, vol. 31, no. 2, pp. 104-123, 2016.
- 34  
35  
36 [30]T. Lubbadeh, "JOB BURNOUT: A GENERAL LITERATURE REVIEW,"  
37 *International Review of Management and Marketing*, vol. 10, pp. 7-15, 2020.
- 38  
39  
40 [31]B. Coomber and K. Louise Barriball, "Impact of job satisfaction components on  
41 intent to leave and turnover for hospital-based nurses: A review of the research  
42 literature," *INTERNATIONAL JOURNAL OF NURSING STUDIES*, vol. 44, no. 2,  
43 pp. 297-314, 2007.
- 44  
45  
46 [32]I. Chen, R. Brown, B. J. Bowers, W. Chang, "Work-to-family conflict as a mediator  
47 of the relationship between job satisfaction and turnover intention," *JOURNAL OF*  
48 *ADVANCED NURSING*, vol. 71, no. 10, pp. 2350-2363, 2015.
- 49  
50  
51 [33]X. D. Zhou, L. Li, T. Hesketh, "Health system reform in rural China: Voices of  
52 healthworkers and service-users," *SOCIAL SCIENCE & MEDICINE*, vol. 117, no.  
53 1982, pp. 134-141, 2014.
- 54  
55  
56 [34]H. Li and G. Y. Yin, "Discussion on the human resource management of public  
57 hospitals under the implementation of the new medical reform," *China Medical*  
58  
59  
60

1  
2  
3 *Herald*, vol. 9, no. 5, pp. 161-163, 2012.

4  
5 [35]E. Yaylali, P. G. Farnham, K. L. Schneider, et al, "From Theory to Practice:  
6 Implementation of a Resource Allocation Model in Health Departments," *Journal*  
7 *of Public Health Management & Practice Jphmp*, vol. 22, no. 6, pp. 567, 2016.

8  
9  
10 [36]J. Li, R. H. Feng, Y. Cui, M. Li, Y. Mao, X. Wang, "Comparison and Enlightenment  
11 on Health Staff , Income in Typical Countries under Different Economic  
12 Development," *Chinese Health Economics*, vol. 32, no. 1, pp. 91-93, 2013.

13  
14  
15 [37]J. You, "Research on the Current Situation and Improvement Strategy of Medical  
16 Personnel Salary Level in China," *Chinese Health Economics*, vol. 37, no. 8, pp.  
17 17-21, 2018.  
18  
19  
20  
21  
22  
23  
24  
25  
26  
27  
28  
29  
30  
31  
32  
33  
34  
35  
36  
37  
38  
39  
40  
41  
42  
43  
44  
45  
46  
47  
48  
49  
50  
51  
52  
53  
54  
55  
56  
57  
58  
59  
60

Table 1. Description of the respondents (n=1279)

| Variables                          | N (%)        | Satisfaction        |          | Job Burnout         |          | Turnover Intention  |          |
|------------------------------------|--------------|---------------------|----------|---------------------|----------|---------------------|----------|
|                                    |              | Prevalence rate (%) | $\chi^2$ | Prevalence rate (%) | $\chi^2$ | Prevalence rate (%) | $\chi^2$ |
| <b>Sex</b>                         |              |                     | 0.016    |                     | 3.233    |                     | 2.328    |
| male                               | 429 (33.50)  | 26.9                |          | 7.19                |          | 9.62                |          |
| female                             | 850 (66.50)  | 53.09               |          | 11.5                |          | 16.42               |          |
| <b>Age (years)</b>                 |              |                     | 13.853** |                     | 33.398** |                     | 55.014** |
| ≤30                                | 380 (29.71)  | 23.31               |          | 7.74                |          | 10.48               |          |
| 31-40                              | 366 (28.62)  | 21.5                |          | 5.79                |          | 8.99                |          |
| 41-50                              | 436 (34.09)  | 28.46               |          | 4.85                |          | 5.94                |          |
| ≥51                                | 97 (7.58)    | 6.72                |          | 0.31                |          | 0.63                |          |
| <b>Occupation</b>                  |              |                     | 2.562    |                     | 3.045    |                     | 3.698    |
| physician                          | 557 (43.55)  | 34.4                |          | 8.29                |          | 12.28               |          |
| nurse                              | 535 (41.83)  | 34.09               |          | 7.27                |          | 10.63               |          |
| specialists in laboratory medicine | 89 (6.96)    | 5.71                |          | 1.72                |          | 1.41                |          |
| public health physician            | 65 (5.08)    | 3.83                |          | 0.86                |          | 1.17                |          |
| pharmacist                         | 33 (2.55)    | 1.95                |          | 0.55                |          | 0.55                |          |
| <b>Educational level</b>           |              |                     | 4.146    |                     | 7.692    |                     | 23.072** |
| junior school and below            | 16 (1.25)    | 0.94                |          | 0.31                |          | 0.39                |          |
| high school/technical school       | 182 (14.23)  | 11.73               |          | 1.8                 |          | 1.88                |          |
| junior college degree              | 474 (37.06)  | 30.34               |          | 6.57                |          | 9.23                |          |
| undergraduate degree and above     | 607 (47.46)  | 36.98               |          | 10.01               |          | 14.54               |          |
| <b>Marital status</b>              |              |                     | 8.618    |                     | 13.308*  |                     | 26.538** |
| married                            | 1012 (79.12) | 64.12               |          | 13.29               |          | 18.22               |          |
| unmarried                          | 227 (17.75)  | 13.76               |          | 4.77                |          | 6.96                |          |
| divorced/Widowed                   | 40 (3.13)    | 2.11                |          | 0.63                |          | 0.86                |          |

|                                  |             |       |          |       |          |       |          |
|----------------------------------|-------------|-------|----------|-------|----------|-------|----------|
| <b>Technical post title</b>      |             |       | 8.8      |       | 7.039    |       | 4.691    |
| no title                         | 286 (22.36) | 18.45 |          | 4.53  |          | 6.25  |          |
| junior title                     | 598 (46.76) | 36.75 |          | 9.23  |          | 12.9  |          |
| intermediate title               | 288 (22.52) | 17.36 |          | 4.07  |          | 5.16  |          |
| senior title                     | 107 (8.36)  | 7.43  |          | 0.86  |          | 1.73  |          |
| <b>Monthly income (RMB)</b>      |             |       | 16.713** |       | 12.166*  |       | 19.817** |
| ≤2000                            | 71 (5.55)   | 3.99  |          | 1.25  |          | 2.19  |          |
| 2001-3000                        | 339 (26.51) | 19.55 |          | 6.18  |          | 8.61  |          |
| 3001-4000                        | 467 (36.51) | 30.18 |          | 6.25  |          | 8.05  |          |
| 4001-5000                        | 266 (20.80) | 17.51 |          | 2.74  |          | 4.69  |          |
| ≥5001                            | 136 (10.63) | 8.76  |          | 2.27  |          | 2.5   |          |
| <b>Hire from</b>                 |             |       | 5.467    |       | 9.631*   |       | 19.637** |
| personnel agent staff            | 171 (13.37) | 52.15 |          | 10.63 |          | 14.78 |          |
| permanent staff                  | 825 (64.50) | 9.93  |          | 3.45  |          | 5.08  |          |
| contract staff                   | 173 (13.53) | 10.87 |          | 2.58  |          | 3.29  |          |
| temporary staff                  | 110 (8.60)  | 7.04  |          | 2.03  |          | 2.89  |          |
| <b>Working time (hours/week)</b> |             |       | 30.865** |       | 34.103** |       | 37.055** |
| ≤30                              | 15 (1.17)   | 0.78  |          | 0.39  |          | 0.47  |          |
| 31-40                            | 629 (49.18) | 41.91 |          | 6.25  |          | 9.38  |          |
| 41-50                            | 427 (33.39) | 26.19 |          | 7.35  |          | 9.93  |          |
| ≥51                              | 208 (16.26) | 11.11 |          | 4.69  |          | 6.25  |          |
| <b>Working years</b>             |             |       | 13.485** |       | 26.683** |       | 44.637** |
| 1-5                              | 326 (25.49) | 20.17 |          | 6.57  |          | 8.99  |          |
| 6-10                             | 202 (15.79) | 11.57 |          | 3.21  |          | 5.39  |          |
| 11-15                            | 115 (8.99)  | 7.04  |          | 1.95  |          | 2.51  |          |
| 16-20                            | 201 (15.72) | 12.28 |          | 3.05  |          | 3.68  |          |
| ≥21                              | 435 (34.01) | 28.93 |          | 3.91  |          | 5.47  |          |
| <b>Night shift</b>               |             |       | 3.406    |       | 18.827** |       | 17.374** |
| 0                                | 769 (60.13) | 49.02 |          | 9.07  |          | 13.21 |          |

1  
2  
3  
4  
5  
6  
7  
8  
9  
10  
11  
12  
13  
14  
15  
16  
17  
18  
19  
20  
21  
22  
23  
24  
25  
26  
27  
28  
29  
30  
31  
32  
33  
34  
35  
36  
37  
38  
39  
40  
41  
42  
43  
44  
45  
46

|              |                   |              |          |              |          |              |          |
|--------------|-------------------|--------------|----------|--------------|----------|--------------|----------|
| 1-3          | 471 (36.83)       | 28.46        |          | 8.6          |          | 11.65        |          |
| >3           | 39 (3.04)         | 2.51         |          | 1.02         |          | 1.18         |          |
| <b>Total</b> | <b>1279 (100)</b> | <b>79.99</b> | <b>—</b> | <b>18.69</b> | <b>—</b> | <b>26.04</b> | <b>—</b> |

Notes: \*  $P < 0.05$ , \*\*  $P < 0.01$

For peer review only



Table 2. Pearson correlation among job satisfaction, burnout, and turnover intention of primary healthcare workers

|                                                    | <b>M</b>     | <b>SD</b>    | <b>Job Satisfaction</b> | <b>Job Burnout</b> | <b>Turnover Intention</b> |
|----------------------------------------------------|--------------|--------------|-------------------------|--------------------|---------------------------|
| <b>Job Satisfaction</b>                            | <b>23.06</b> | <b>5.377</b> | <b>1.000</b>            | <b>-0.387</b>      | <b>-0.414</b>             |
| Working environment                                | 4.08         | 0.921        | 0.882                   | -0.298             | -0.299                    |
| Welfare                                            | 3.63         | 1.093        | 0.902                   | -0.356             | -0.401                    |
| Prospect of my job                                 | 3.84         | 0.963        | 0.911                   | -0.370             | -0.403                    |
| Training and learning opportunities                | 3.89         | 0.960        | 0.889                   | -0.342             | -0.366                    |
| Income distribution                                | 3.71         | 1.046        | 0.917                   | -0.350             | -0.393                    |
| Management system and business process             | 3.91         | 0.941        | 0.908                   | -0.386             | -0.384                    |
| <b>Job Burnout</b>                                 | <b>10.87</b> | <b>4.392</b> | <b>-0.387</b>           | <b>1.000</b>       | <b>0.797</b>              |
| My work is heavy                                   | 3.42         | 1.008        | -0.134                  | 0.365              | 0.325                     |
| I can't find personal accomplishment in my job     | 2.10         | 0.990        | -0.319                  | 0.889              | 0.679                     |
| I'm indifference of my job                         | 2.02         | 0.996        | -0.352                  | 0.911              | 0.737                     |
| I feel anxious and fretful                         | 2.16         | 1.006        | -0.373                  | 0.884              | 0.752                     |
| <b>Turnover Intention</b>                          | <b>8.97</b>  | <b>3.614</b> | <b>-0.414</b>           | <b>0.797</b>       | <b>1.000</b>              |
| I once thought to leave my current organization    | 2.24         | 1.104        | -0.430                  | 0.765              | 0.881                     |
| I shall likely seek a new job within the next year | 1.86         | 0.869        | -0.297                  | 0.763              | 0.841                     |
| I shall accept a new job if I have a chance        | 2.45         | 1.207        | -0.403                  | 0.652              | 0.881                     |
| I can find a good job                              | 2.43         | 1.076        | -0.231                  | 0.543              | 0.788                     |

Notes: All  $P_s < 0.01$ . M- mean value; SD- standard deviation

Table 3. The standard effects in the hypothetical model

| Endogenous variables | Exogenous variables | Estimate | C.R.    | Direct effect ( <i>P</i> ) | Indirect effect ( <i>P</i> ) | Total effect ( <i>P</i> ) |
|----------------------|---------------------|----------|---------|----------------------------|------------------------------|---------------------------|
| Turnover intention   | Burnout             | 0.845    | 34.055  | 0.845 (< 0.001)            | 0.047 (< 0.001)              | 0.892 (< 0.001)           |
|                      | Satisfaction        | -0.116   | -6.023  | -0.116 (< 0.001)           | ---                          | -0.116 (< 0.001)          |
| Satisfaction         | Burnout             | -0.409   | -14.298 | -0.409 (< 0.001)           | ---                          | -0.409 (< 0.001)          |

Notes: C.R.- critical ratios

For peer review only

Table 4. Testing for invariant factorial structure of a measuring instrument

| <b>Model</b>           | <b>delta-<math>x^2</math></b> | <b>delta-df</b> | <b><i>P</i></b> | <b>delta-<math>x^2</math>/<br/>df</b> | <b>delta-GFI</b> | <b>delta-AGFI</b> | <b>delta-NFI</b> | <b>delta-RFI</b> | <b>delta-IFI</b> | <b>delta-TLI</b> |
|------------------------|-------------------------------|-----------------|-----------------|---------------------------------------|------------------|-------------------|------------------|------------------|------------------|------------------|
| Measurement weights    | 12.207                        | 11              | 0.35            | 0                                     | 0.003            | -0.001            | 0.002            | 0                | 0.002            | 0                |
| Structural weights     | 23.296                        | 22              | 0.39            | -0.001                                | 0.005            | -0.002            | 0.003            | 0                | 0.003            | 0                |
| Structural covariances | 95.617                        | 36              | < 0.05          | -0.007                                | 0.003            | -0.006            | 0.001            | -0.003           | 0.001            | -0.003           |
| Structural residuals   | 98.133                        | 39              | < 0.05          | -0.007                                | 0.003            | -0.006            | 0.002            | -0.003           | 0.001            | -0.003           |
| Measurement residuals  | 196.600                       | 53              | < 0.05          | -0.015                                | -0.003           | -0.012            | -0.002           | -0.008           | -0.002           | -0.008           |

1  
2  
3  
4  
5  
6  
7  
8  
9  
10  
11  
12  
13  
14  
15  
16  
17  
18  
19  
20  
21  
22  
23  
24  
25  
26  
27  
28  
29  
30  
31  
32  
33  
34  
35  
36  
37  
38  
39  
40  
41  
42  
43  
44  
45  
46  
47  
48  
49  
50  
51  
52  
53  
54  
55  
56  
57  
58  
59  
60

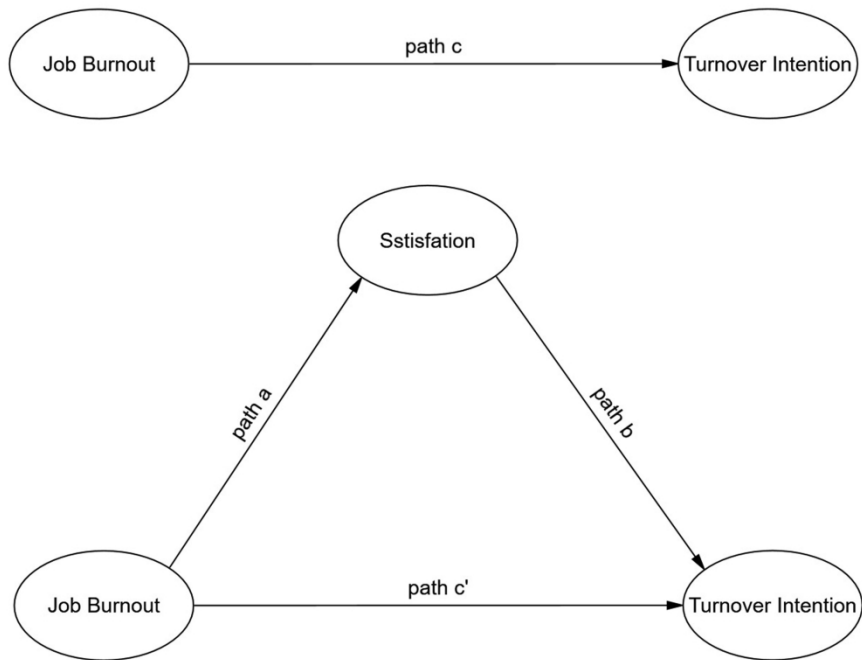

Figure 1. Hypothesized model of burnout, satisfaction, and turnover intention

370x370mm (300 x 300 DPI)

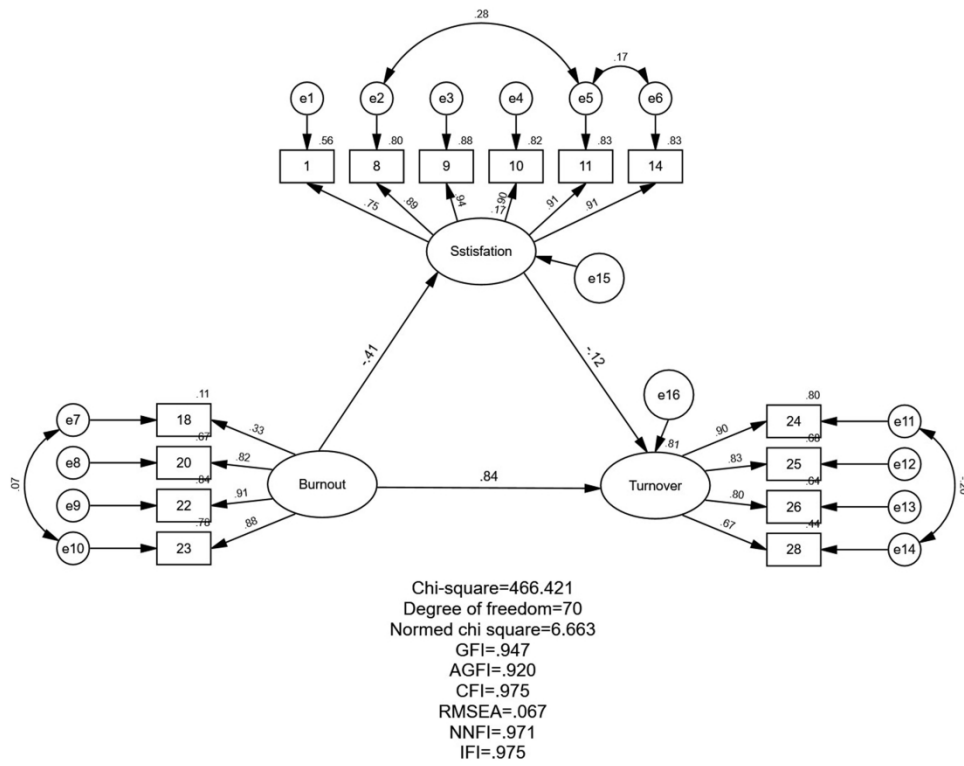

Figure 2. The structural equation modeling for the hypothetical model

370x370mm (300 x 300 DPI)

1  
2  
3  
4  
5  
6  
7  
8  
9  
10  
11  
12  
13  
14  
15  
16  
17  
18  
19  
20  
21  
22  
23  
24  
25  
26  
27  
28  
29  
30  
31  
32  
33  
34  
35  
36  
37  
38  
39  
40  
41  
42  
43  
44  
45  
46  
47  
48  
49  
50  
51  
52  
53  
54  
55  
56  
57  
58  
59  
60

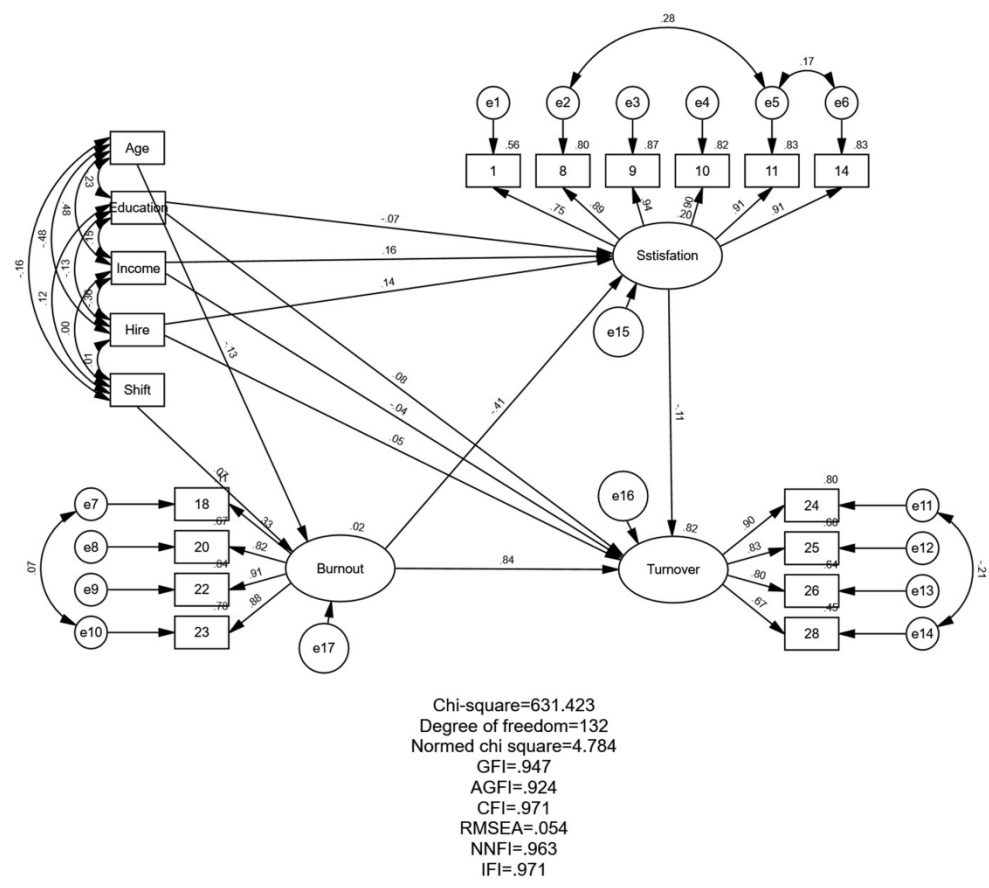

Figure 3. The structural equation modeling after introducing demographic characteristic

370x370mm (300 x 300 DPI)

Dear medical staff,

Attention, please! We are students at Wuhan University. To realize the job burnout, job satisfaction, and turnover intention of medical staff, and provide a reference for administration, we sincerely invite you to conduct a questionnaire survey. This research will not harm your health and will not affect your current work. All your information will be treated in strict confidence and kept by the investigator. There are 41 questions in the questionnaire. Please answer the questions based on real conditions.

Thank you for your active participation again!

Q1 Would you like to participate in this survey?      yes       no

If yes, please fill in the following question. If no, the investigation ends.

Q2 Hospital Name: \_\_\_\_\_

Q3 Gender:    male     female

Q4 Age: \_\_\_\_\_ years

Q5 Educational level:    Junior school and below     High school/Technical school   
                                         Junior college degree     Undergraduate degree and above

Q6 Marital status:    Married     Unmarried     Divorced/Widowed

Q7 Occupation:    Physician     Nurse     Specialists in laboratory medicine   
                                         Public health physician     Pharmacist

Q8 Technical post title:    No title     Junior title   
                                         Intermediate title     Senior title

Q9 Monthly income (RMB):    ≤2000     2001-3000     3001-4000   
                                         4001-5000     ≥5001

Q10 Hire from:    Personnel agent staff     Permanent staff   
                                         Contract staff     Temporary staff

Q11 Working time (hours per week): \_\_\_\_\_

Q12 Working years: \_\_\_\_\_

Q13 Night shift (per week):    0     1-3     >3

### About job satisfaction:

Q14 I feel comfortable about the working environment (office environment, virescence, light, ventilation, et.): **[item 1]**

Very dissatisfied     Dissatisfied     Average     Satisfied     Very satisfied

Q15 Sufficient technical equipment (professional information inquiry resources, instruments, etc.) for work use: **[item 2]**

Very dissatisfied     Dissatisfied     Average     Satisfied     Very satisfied

Q16 Harmonious interpersonal relationship (between superiors and subordinates): **[item 3]**

Very dissatisfied     Dissatisfied     Average     Satisfied     Very satisfied

Q17 Good cooperation between different departments: **[item 4]**

Very dissatisfied     Dissatisfied     Average     Satisfied     Very satisfied

Q18 The atmosphere is good: **[item 5]**

Very dissatisfied     Dissatisfied     Average     Satisfied     Very satisfied

Q19 The leadership is good: **[item 6]**

- 1  
2  
3           Very dissatisfied  Dissatisfied  Average  Satisfied  Very satisfied
- 4 Q20 I am satisfied with current income level: [item 7]
- 5           Very dissatisfied  Dissatisfied  Average  Satisfied  Very satisfied
- 6 Q21 I am satisfied with the welfare: [item 8]
- 7           Very dissatisfied  Dissatisfied  Average  Satisfied  Very satisfied
- 8 Q22 I am satisfied with the prospect of my job: [item 9]
- 9           Very dissatisfied  Dissatisfied  Average  Satisfied  Very satisfied
- 10 Q23 I am satisfied with the training and learning opportunities offered (frequency, form,  
11 and content): [item 10]
- 12           Very dissatisfied  Dissatisfied  Average  Satisfied  Very satisfied
- 13 Q24 The income distribution is reasonable: [item 11]
- 14           Very dissatisfied  Dissatisfied  Average  Satisfied  Very satisfied
- 15 Q25 The performance reward mechanism is reasonable: [item 12]
- 16           Very dissatisfied  Dissatisfied  Average  Satisfied  Very satisfied
- 17 Q26 The performance reward system has achieved good results: [item 13]
- 18           Very dissatisfied  Dissatisfied  Average  Satisfied  Very satisfied
- 19 Q27 The management system and business process are good: [item 14]
- 20           Very dissatisfied  Dissatisfied  Average  Satisfied  Very satisfied
- 21  
22  
23  
24  
25  
26  
27

### About job burnout:

- 28 Q28 I'm interested in my job: [item 15]
- 29           Strongly disagree  Disagree  Average  Agree  Strongly agree
- 30 Q29 I'm fit for this job: [item 16]
- 31           Strongly disagree  Disagree  Average  Agree  Strongly agree
- 32 Q30 I think my work is challenging: [item 17]
- 33           Strongly disagree  Disagree  Average  Agree  Strongly agree
- 34 Q31 My work is heavy: [item 18]
- 35           Strongly disagree  Disagree  Average  Agree  Strongly agree
- 36 Q32 I think my work is meaningless: [item 19]
- 37           Strongly disagree  Disagree  Average  Agree  Strongly agree
- 38 Q33 I can't find personal accomplishment in my job: [item 20]
- 39           Strongly disagree  Disagree  Average  Agree  Strongly agree
- 40 Q34 I feel exhausted: [item 21]
- 41           Strongly disagree  Disagree  Average  Agree  Strongly agree
- 42 Q35 I'm indifference of my job: [item 22]
- 43           Strongly disagree  Disagree  Average  Agree  Strongly agree
- 44 Q36 I feel anxious and fretful: [item 23]
- 45           Strongly disagree  Disagree  Average  Agree  Strongly agree
- 46  
47  
48  
49  
50  
51  
52  
53

### About turnover intention:

- 54 Q37 I once thought to leave my current organization: [item 24]
- 55           Strongly disagree  Disagree  Average  Agree  Strongly agree
- 56 Q38 I shall likely seek a new job within the next year: [item 25]
- 57           Strongly disagree  Disagree  Average  Agree  Strongly agree
- 58  
59  
60



1  
2  
3 Q39 I shall accept a new job if I have a chance: [item 26]

4 Strongly disagree  Disagree  Average  Agree  Strongly agree

5  
6 Q40 I consider that the employment situation is favorable: [item 27]

7 Strongly disagree  Disagree  Average  Agree  Strongly agree

8  
9 Q41 I can find a good job: [item 28]

10 Strongly disagree  Disagree  Average  Agree  Strongly agree

11  
12 **Thank you for your participation!**

13  
14  
15 Survey date: \_\_\_\_Y/\_\_\_\_M/\_\_\_\_D

16 Questionnaire coding: \_\_\_\_\_

17  
18  
19  
20  
21  
22  
23  
24  
25  
26  
27  
28  
29  
30  
31  
32  
33  
34  
35  
36  
37  
38  
39  
40  
41  
42  
43  
44  
45  
46  
47  
48  
49  
50  
51  
52  
53  
54  
55  
56  
57  
58  
59  
60

For peer review only

## STROBE Statement—checklist of items that should be included in reports of observational studies

|                              | Item No | Recommendation                                                                                                                                                                                                                                                                                                                                                                                                                                                         | Page No |
|------------------------------|---------|------------------------------------------------------------------------------------------------------------------------------------------------------------------------------------------------------------------------------------------------------------------------------------------------------------------------------------------------------------------------------------------------------------------------------------------------------------------------|---------|
| <b>Title and abstract</b>    | 1       | (a) Indicate the study's design with a commonly used term in the title or the abstract                                                                                                                                                                                                                                                                                                                                                                                 | 2       |
|                              |         | (b) Provide in the abstract an informative and balanced summary of what was done and what was found                                                                                                                                                                                                                                                                                                                                                                    | 2       |
| <b>Introduction</b>          |         |                                                                                                                                                                                                                                                                                                                                                                                                                                                                        |         |
| Background/rationale         | 2       | Explain the scientific background and rationale for the investigation being reported                                                                                                                                                                                                                                                                                                                                                                                   | 4-6     |
| Objectives                   | 3       | State specific objectives, including any prespecified hypotheses                                                                                                                                                                                                                                                                                                                                                                                                       | 5       |
| <b>Methods</b>               |         |                                                                                                                                                                                                                                                                                                                                                                                                                                                                        |         |
| Study design                 | 4       | Present key elements of study design early in the paper                                                                                                                                                                                                                                                                                                                                                                                                                | 6       |
| Setting                      | 5       | Describe the setting, locations, and relevant dates, including periods of recruitment, exposure, follow-up, and data collection                                                                                                                                                                                                                                                                                                                                        | 6       |
| Participants                 | 6       | (a) <i>Cohort study</i> —Give the eligibility criteria, and the sources and methods of selection of participants. Describe methods of follow-up<br><i>Case-control study</i> —Give the eligibility criteria, and the sources and methods of case ascertainment and control selection. Give the rationale for the choice of cases and controls<br><i>Cross-sectional study</i> —Give the eligibility criteria, and the sources and methods of selection of participants | 6       |
|                              |         | (b) <i>Cohort study</i> —For matched studies, give matching criteria and number of exposed and unexposed<br><i>Case-control study</i> —For matched studies, give matching criteria and the number of controls per case                                                                                                                                                                                                                                                 | N/A     |
| Variables                    | 7       | Clearly define all outcomes, exposures, predictors, potential confounders, and effect modifiers. Give diagnostic criteria, if applicable                                                                                                                                                                                                                                                                                                                               | 6-7     |
| Data sources/<br>measurement | 8*      | For each variable of interest, give sources of data and details of methods of assessment (measurement). Describe comparability of assessment methods if there is more than one group                                                                                                                                                                                                                                                                                   | 6-7     |
| Bias                         | 9       | Describe any efforts to address potential sources of bias                                                                                                                                                                                                                                                                                                                                                                                                              | N/A     |
| Study size                   | 10      | Explain how the study size was arrived at                                                                                                                                                                                                                                                                                                                                                                                                                              | N/A     |
| Quantitative variables       | 11      | Explain how quantitative variables were handled in the analyses. If applicable, describe which groupings were chosen and why                                                                                                                                                                                                                                                                                                                                           | N/A     |
| Statistical methods          | 12      | (a) Describe all statistical methods, including those used to control for confounding                                                                                                                                                                                                                                                                                                                                                                                  | 7-8     |
|                              |         | (b) Describe any methods used to examine subgroups and interactions                                                                                                                                                                                                                                                                                                                                                                                                    | 7-8     |
|                              |         | (c) Explain how missing data were addressed                                                                                                                                                                                                                                                                                                                                                                                                                            | N/A     |
|                              |         | (d) <i>Cohort study</i> —If applicable, explain how loss to follow-up was addressed<br><i>Case-control study</i> —If applicable, explain how matching of cases and controls was addressed<br><i>Cross-sectional study</i> —If applicable, describe analytical methods taking account of sampling strategy                                                                                                                                                              | N/A     |
|                              |         | (e) Describe any sensitivity analyses                                                                                                                                                                                                                                                                                                                                                                                                                                  | N/A     |

Continued on next page

| <b>Results</b>           |     |                                                                                                                                                                                                              |      |
|--------------------------|-----|--------------------------------------------------------------------------------------------------------------------------------------------------------------------------------------------------------------|------|
| Participants             | 13* | (a) Report numbers of individuals at each stage of study—eg numbers potentially eligible, examined for eligibility, confirmed eligible, included in the study, completing follow-up, and analysed            | 6, 8 |
|                          |     | (b) Give reasons for non-participation at each stage                                                                                                                                                         | N/A  |
|                          |     | (c) Consider use of a flow diagram                                                                                                                                                                           |      |
| Descriptive data         | 14* | (a) Give characteristics of study participants (eg demographic, clinical, social) and information on exposures and potential confounders                                                                     | 8    |
|                          |     | (b) Indicate number of participants with missing data for each variable of interest                                                                                                                          | N/A  |
|                          |     | (c) <i>Cohort study</i> —Summarise follow-up time (eg, average and total amount)                                                                                                                             | N/A  |
| Outcome data             | 15* | <i>Cohort study</i> —Report numbers of outcome events or summary measures over time                                                                                                                          | N/A  |
|                          |     | <i>Case-control study</i> —Report numbers in each exposure category, or summary measures of exposure                                                                                                         | N/A  |
|                          |     | <i>Cross-sectional study</i> —Report numbers of outcome events or summary measures                                                                                                                           | 8    |
| Main results             | 16  | (a) Give unadjusted estimates and, if applicable, confounder-adjusted estimates and their precision (eg, 95% confidence interval). Make clear which confounders were adjusted for and why they were included | 9    |
|                          |     | (b) Report category boundaries when continuous variables were categorized                                                                                                                                    | N/A  |
|                          |     | (c) If relevant, consider translating estimates of relative risk into absolute risk for a meaningful time period                                                                                             | N/A  |
| Other analyses           | 17  | Report other analyses done—eg analyses of subgroups and interactions, and sensitivity analyses                                                                                                               | N/A  |
| <b>Discussion</b>        |     |                                                                                                                                                                                                              |      |
| Key results              | 18  | Summarise key results with reference to study objectives                                                                                                                                                     | 8-10 |
| Limitations              | 19  | Discuss limitations of the study, taking into account sources of potential bias or imprecision. Discuss both direction and magnitude of any potential bias                                                   | 12   |
| Interpretation           | 20  | Give a cautious overall interpretation of results considering objectives, limitations, multiplicity of analyses, results from similar studies, and other relevant evidence                                   | 12   |
| Generalisability         | 21  | Discuss the generalisability (external validity) of the study results                                                                                                                                        | 11   |
| <b>Other information</b> |     |                                                                                                                                                                                                              |      |
| Funding                  | 22  | Give the source of funding and the role of the funders for the present study and, if applicable, for the original study on which the present article is based                                                | N/A  |

\*Give information separately for cases and controls in case-control studies and, if applicable, for exposed and unexposed groups in cohort and cross-sectional studies.

**Note:** An Explanation and Elaboration article discusses each checklist item and gives methodological background and published examples of transparent reporting. The STROBE checklist is best used in conjunction with this article (freely available on the Web sites of PLoS Medicine at <http://www.plosmedicine.org/>, Annals of Internal Medicine at <http://www.annals.org/>, and Epidemiology at <http://www.epidem.com/>). Information on the STROBE Initiative is available at [www.strobe-statement.org](http://www.strobe-statement.org).

# BMJ Open

## Job Burnout and Turnover Intention among Chinese Primary Healthcare Staff: The Mediating Effect of Satisfaction

|                                 |                                                                                                                                                                                                                                                                                     |
|---------------------------------|-------------------------------------------------------------------------------------------------------------------------------------------------------------------------------------------------------------------------------------------------------------------------------------|
| Journal:                        | <i>BMJ Open</i>                                                                                                                                                                                                                                                                     |
| Manuscript ID                   | bmjopen-2019-036702.R3                                                                                                                                                                                                                                                              |
| Article Type:                   | Original research                                                                                                                                                                                                                                                                   |
| Date Submitted by the Author:   | 26-Aug-2020                                                                                                                                                                                                                                                                         |
| Complete List of Authors:       | Ran, Li; Wuhan University<br>Chen, Xuyu; Wuhan University<br>Peng, Shuzhen; Huangpi People's Hospital<br>Zheng, Feng; Health Committee of Huangpi District of Wuhan<br>Tan, Xiaodong; Wuhan University; Wuchang University of Technology<br>Duan, Ruihua; Huangpi People's Hospital |
| <b>Primary Subject Heading</b>: | Health services research                                                                                                                                                                                                                                                            |
| Secondary Subject Heading:      | Health services research, Occupational and environmental medicine, Public health                                                                                                                                                                                                    |
| Keywords:                       | Health & safety < HEALTH SERVICES ADMINISTRATION & MANAGEMENT, Human resource management < HEALTH SERVICES ADMINISTRATION & MANAGEMENT, PUBLIC HEALTH                                                                                                                               |
|                                 |                                                                                                                                                                                                                                                                                     |

SCHOLARONE™  
Manuscripts

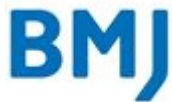

I, the Submitting Author has the right to grant and does grant on behalf of all authors of the Work (as defined in the below author licence), an exclusive licence and/or a non-exclusive licence for contributions from authors who are: i) UK Crown employees; ii) where BMJ has agreed a CC-BY licence shall apply, and/or iii) in accordance with the terms applicable for US Federal Government officers or employees acting as part of their official duties; on a worldwide, perpetual, irrevocable, royalty-free basis to BMJ Publishing Group Ltd ("BMJ") its licensees and where the relevant Journal is co-owned by BMJ to the co-owners of the Journal, to publish the Work in this journal and any other BMJ products and to exploit all rights, as set out in our [licence](#).

The Submitting Author accepts and understands that any supply made under these terms is made by BMJ to the Submitting Author unless you are acting as an employee on behalf of your employer or a postgraduate student of an affiliated institution which is paying any applicable article publishing charge ("APC") for Open Access articles. Where the Submitting Author wishes to make the Work available on an Open Access basis (and intends to pay the relevant APC), the terms of reuse of such Open Access shall be governed by a Creative Commons licence – details of these licences and which [Creative Commons](#) licence will apply to this Work are set out in our licence referred to above.

Other than as permitted in any relevant BMJ Author's Self Archiving Policies, I confirm this Work has not been accepted for publication elsewhere, is not being considered for publication elsewhere and does not duplicate material already published. I confirm all authors consent to publication of this Work and authorise the granting of this licence.

# Job Burnout and Turnover Intention among Chinese Primary Healthcare Staff: The Mediating Effect of Satisfaction

Li Ran<sup>1\*</sup>, Xuyu Chen<sup>1\*</sup>, Shuzhen Peng<sup>2</sup>, Feng Zheng<sup>3</sup>, Xiaodong Tan<sup>14#</sup>, and Ruihua  
Duan<sup>2#</sup>

## Affiliations:

<sup>1</sup> Department of Occupational and Environmental Health, School of Health Sciences, Wuhan University, Wuhan, 430071, China; Email: [celesteyien@163.com](mailto:celesteyien@163.com) (Li Ran); [5827623310@163.com](mailto:5827623310@163.com) (Xuyu Chen)

<sup>2</sup> Huangpi People's Hospital, Wuhan, 432200, China; Email: [1718274898@qq.com](mailto:1718274898@qq.com) (Shuzhen Peng)

<sup>3</sup> Health Committee of Huangpi District of Wuhan, Wuhan, 430300, China; Email: [694184610@qq.com](mailto:694184610@qq.com) (Feng Zheng)

<sup>4</sup> School of Nursing, Wuchang University of Technology, Wuhan, 430223, China.

\*These authors contributed equally to this paper.

# Address correspondence to:

**Professor Xiaodong Tan, Ph.D.**

Department of Occupational and Environmental Health, School of Health Sciences, Wuhan University, 115 Donghu Road, Wuchang District, Wuhan, 430071, P. R. China.  
Email: [whutanxiaodong@163.com](mailto:whutanxiaodong@163.com)

**Professor Ruihua Duan, Ph.D.**

Huangpi People's Hospital, 259 Baixiu Street, Huangpi District, Wuhan, 432200, P. R. China. Email: [854757230@qq.com](mailto:854757230@qq.com)

## Abstract

**Objectives:** Although China has done a lot in strengthening the primary healthcare system, the high turnover intention is still a social problem to be reckoned with. The objective of this study is to explore the mediating effect of satisfaction between job burnout and turnover intention.

**Design:** Cross-sectional study.

**Methods:** A cross-sectional study was conducted to make sense of the job burnout, satisfaction, and turnover intention among primary healthcare workers in central China. Structural equation modeling (SEM) was performed to study the mediating effect of satisfaction between job burnout and turnover intention with maximum likelihood estimation. The mediation effect test was carried out by using the bootstrap method.

**Results:** SEM showed that job burnout was positively related to the turnover intention with the standard path coefficient of 0.845 ( $C.R. = 34.055, P < 0.001$ ). The partial mediating effect of satisfaction was 0.047, making up 5.32% of the total effect. The goodness-of-fit was acceptable ( $GFI = 0.947, CFI = 0.975, RMSEA = 0.067, NNFI = 0.971, IFI = 0.975$ ). Age, education level, monthly income, hire form, and night shift were also found significantly correlated with turnover intention, and no difference was found between physicians and nurses.

**Conclusions:** The turnover intention is significantly affected by job burnout, satisfaction, and demographic characteristics including age, education level, monthly income, hire form, and night shift. Satisfaction can be regarded as a mediator between job burnout and turnover intention. Relative measures can be taken to promote enthusiasm and satisfaction thus decreasing the turnover rate.

**Keywords:** Burnout; Job Satisfaction; Turnover Intention; Mediating Effect; Healthcare

### Strengths and limitations of this study

- Structural equation modeling is adopted so that the qualitative and quantitative analyses can explore the relationship between job burnout, satisfaction, and turnover intention.
- A multiple-group analysis was conducted between the physicians and nurses guaranteeing the applicability.
- This study summarizes the influence demographic characteristics posed on the turnover intention among China's primary healthcare workers, enriching the study content.
- The reliability of structural equation modeling is repeatedly tested.
- Inability to accurately discuss the representativeness of the cross-sectional study.



## 1 Background

Health and medical personnel play a seminal role in fulfilling the healthcare needs of the entire population, therefore, a robust allocation of human resources maintains the health system running smoothly and also guarantees people accessing to healthcare priority equally [1]. Unfortunately, the current out-of-balance between healthcare staff supply and demand has challenged this priority and triggered a global problem of continual brain drain. Up to 2013, the scarcity of healthcare workers (including physicians, nurses, and midwives) worldwide was estimated at 7.2 million, and it will sharply rising to 12.9 million by 2035 [2].

As a developing country with a huge population, China's shortage of health workforce has posed one of the major obstacles to primary healthcare services. According to the *China health statistics yearbook*, there are only 0.46 pediatricians per 1,000 children, much lower than the goal number of 2.06 per 1,000 children. Equally consistent is the finding that the number of anesthesiologists per 10,000 people is less than 0.65, while the number in some developed countries in Europe is 2.5 to 3 [3]. To make matters worse, primary healthcare workers are generally confronted with the challenge of high turnover intention, which has become a social problem to be reckoned with [4]. Results of a survey show that from 2010 to 2016, the proportion of Chinese primary healthcare staff decreased from 44% to 33% [5]. Moreover, the average turnover rate of nurses in first-class tertiary hospitals is 5.8% in China, which goes up to 8-10% in economically advanced regions like Shanghai and Guangzhou [6]. Under this circumstance, the turnover intention has been an important and popular study subject in psychology and management field.

Turnover intention reflects an individual's conscious and deliberate willfulness to quit one's job or organization within a certain period, which would possibly pose a major problem in healthcare system resulting in a high turnover rate [7-9]. That is to say, the turnover intention is the strongest cognitive precursor of turnover, directly affecting the choice of departure. Because of a considerable number of predictive modeling formulas of voluntary turnover has been established, researchers generally recognized and supported that several hypothesized variables are associated with the intention to leave, involving commuting stress, emotional intelligence, job stress, job burnout, and job satisfaction [10-13]. Among the hypothesized linkages above, job burnout and satisfaction are the most common proposed antecedents.

1  
2  
3 In the late 1980s, Pines and Aronson defined job burnout as a state of physical,  
4 emotional, and mental exhaustion [14,15]. It describes the individuals' psychological  
5 response to prolonged interpersonal and chronic emotional stressors, dominantly  
6 caused by a long-term involvement in emotionally demanding situations [16]. Job  
7 burnout can be categorized into three dimensions, including emotional exhaustion,  
8 depersonalization, and the sense of reduced personalized accomplishment. Looking  
9 from the former researches, job burnout has a strong positive relationship with turnover  
10 intention whereas a negative relation with job satisfaction [17,18]. Job satisfaction  
11 encompasses employees' feelings and thoughts about various aspects of their job. In  
12 other words, job satisfaction refers to an individual's cognitive or effective evaluation  
13 of his or her occupational duties, presenting the extent people like the job and reflecting  
14 the effective judgments people hold toward their work condition [19,20]. Numerous  
15 studies have repeatedly verified that job satisfaction is inversely related to turnover and  
16 intent to leave. In addition to direct effects, we propose that job satisfaction serves as a  
17 mediator through which job burnout affects turnover intention as well. Yet, there is still  
18 a lack of literature supporting our hypothesis, hence, it is necessary to conduct this study  
19 to make up the gap.

20  
21  
22 Taken together, the theoretical framework utilized in this study originated from  
23 researches suggesting that turnover intention maybe both related to satisfaction and  
24 burnout toward the job. Accordingly, we hypothesized that:

25  
26  
27 H1: Job burnout is positively related to turnover intention.

28  
29  
30 H2: Job satisfaction is negatively related to turnover intention.

31  
32  
33 H3: Job satisfaction is negatively related to job burnout.

34  
35  
36 H4: Job satisfaction has a mediating effect between job burnout and turnover intention.

37  
38  
39 As shown in Figure 1, we tested this theoretical model with the data from primary  
40 healthcare staff in central China to explore the mediating effect of satisfaction.

## 41 42 43 **2 Methods**

### 44 45 46 **2.1 Design and Sample**

47  
48  
49 In this investigation, we utilized survey research methods to make sense of the job  
50 burnout, satisfaction, and turnover intention of primary healthcare staff. From March to  
51 May 2019, a cross-sectional study was conducted in Huangpi District of Wuhan in  
52 central China. The sample size was estimated with the average detection rate of burnout  
53 in China with the equation:  $n = Z_{(\alpha/2)}^2 \times p \times (1 - p) / \delta^2$ , where  $\alpha$  is 0.05,  $\delta$  is 0.08, and

1  
2  
3 *p* is 55%. To compensate for the non-response rate, the sample was increased by 10%  
4 with a final sample size of 540. Participants involved met the following inclusion  
5 criteria: ① working for at least 6 months; and ② being volunteered to participate in  
6 the survey. All participants were recruited face-to-face from 29 primary health care  
7 institutions in Huangpi District by our research group. Participants fulfilled electronic  
8 questionnaires with a mobile application or they orally answered questions and the  
9 results were synchronously typed in. The study data was anonymous to protect privacy.  
10 Ethical approval for this study was granted by the Research Ethics Boards of Wuhan  
11 University, and informed consent was obtained. The questionnaire comprised following  
12 sections: sociodemographic information, job satisfaction, job burnout, and turnover  
13 intention. (See detail in Appendix)  
14  
15  
16  
17  
18  
19  
20  
21

## 22 **2.2 Methods of Measurement**

### 23 **2.2.1 Job Satisfaction**

24  
25  
26 On the bases of the local actual condition, we collected the job satisfaction  
27 information utilizing an adjusted satisfaction scale. The adjusted scale referred for the  
28 Minnesota Satisfaction Questionnaire (MSQ) [21], Job Satisfaction Survey (JSS) [22],  
29 and Job Descriptive Index (JDI) [23], including 14 items (item 1 to 14) about the  
30 satisfaction with the internal environment, external environment, remunerations,  
31 management, and work itself. Participants responded to a 5-point Likert scale ranging  
32 from 1 point (the most unsatisfaction) to 5 points (the most satisfaction). A higher score  
33 indicates a higher satisfaction.  
34  
35  
36  
37  
38  
39

### 40 **2.2.2 Job Burnout**

41  
42  
43 The information on participants' job burnout was gathered with an adjusted 5-point  
44 Likert burnout scale according to the Maslach Burnout Inventory-General Survey  
45 (MBI-GS) developed by Maslach and Jackson [24]. Several emotion-related items were  
46 used to describe participants' burnout experience, including "I'm interested in my job"  
47 (item 15, reverse coded), "I'm fit for this job" (item 16, reverse coded), "I think my  
48 work is challenging" (item 17), "My work is heavy" (item 18), "I think my work is  
49 meaningless" (item 19), "I can't find personal accomplishment in my job" (item 20),  
50 "I feel exhausted" (item 21), "I'm indifference of my job" (item 22), and "I feel anxious  
51 and fretful" (item 23). A higher score indicates a greater propensity for job burnout.  
52  
53  
54  
55  
56  
57  
58  
59  
60

### 2.2.3 Turnover Intention

The turnover intention was similarly measured with an adjusted scale concerning several plan-related items. The adjusted scale referred for a six-item version of the turnover intention scale (TIS-6) explored by Griffeth [25]. The items include “I once thought to leave my current organization” (item 24), “I shall likely seek a new job within the next year” (item 25), “I shall accept a new job if I have a chance” (item 26), “I consider that the employment situation is favorable” (item 27), and “I can find a good job” (item 28). The above items were evaluated with a 5-point Likert scale, where 1 represents strongly disagree, 2 represents disagree, 3 represents slightly disagree, 4 represents agree, and 5 represents strongly agree.

## 2.3 Statistical Analysis

All statistical analyses and hypothesis testing were performed using SPSS version 22.0 and AMOS version 21.0, with two-sided tests. In the first stage, an empirical study was processed to optimize items in each scale, including discrimination tests and collinearity diagnostics. Then, an exploratory factor analysis (EFA), confirmatory factor analysis (CFA), and a Cronbach’s alpha coefficient method were applied to check the discriminant validity and reliability of above-mentioned scales. In the next stage, the Pearson product-moment correlation coefficients were calculated to analyze the correlations between variables. Last, the effect of job burnout on turnover intention via satisfaction was examined using a structural equation modeling (SEM) with maximum likelihood estimation. The mediation effect test was carried out by using the bootstrap method. The goodness-of-fit of the model was evaluated with chi-square statistic, the goodness of fit index (GFI), the comparative fit index (CFI), the root mean square error of approximation (RMSEA), the non-normed fit index (NNFI), and the incremental fit index (IFI). The model fitted well when  $GFI > 0.90$ ,  $CFI > 0.90$ ,  $RMSEA < 0.05$ ,  $NNFI > 0.90$ , and  $IFI > 0.90$ .

## 2.4 Patient and public involvement

Participants were not involved in development of the research question and outcome measures, study design or conduct of this study.

# 3 Results

## 3.1 Profile of Sample

A total of 1300 electronic questionnaires were sent out, and 1279 eligible participants

1  
2  
3 left after deleting those with uncompleted or suspected unreal answers. The effective  
4 rate is 98.38%. As shown in Table 1, over half of the participants (66.50%) were female;  
5 79.12% were married; 43.55% were physicians and 41.83% were nurses; 63.02%  
6 earned 2001-4000 Chinese Renminbi (RMB, US \$ 290.97-581.65) per month. The most  
7 frequent occupational title was junior tile (accounting for 46.76%) and the most  
8 frequent education level was separately undergraduate degree and above (accounting  
9 for 47.46%) and junior college degree (accounting for 37.06%). The prevalence rate of  
10 satisfaction, job burnout, and turnover intention was separately 79.99%, 18.69%, and  
11 26.04%. The median (range) score of satisfaction, job burnout, and turnover intention  
12 was 52 (13-65), 22 (9-37), and 12 (5-25).

## 20 **3.2 Tests of the Hypothetical Model**

### 21 **3.2.1 Reliability and Validity Analysis**

22  
23 Before reliability analysis and validity analysis, we applied discrimination tests and  
24 collinearity diagnostics to filter optimal items. Although the adjusted satisfaction scale  
25 yields high indices of discrimination, there exists strong collinearity from item 1 to item  
26 7, item 12, and item 13. After all comprehensive considerations, we deleted relative  
27 items except item 1. The Cronbach's  $\alpha$  of this scale reaches 0.956, indicating  
28 satisfactory reliability. Moreover, the modified scale construction  
29 is effective measuring by EFA (Kaiser-Meyer-Olkin = 0.928,  $P < 0.001$ ) and suitable  
30 for CFA. The model finally fit the data acceptably ( $\chi^2/df = 7.889$ ,  $GFI = 0.986$  ~~0.973~~,  
31  $CFI = 0.994$ ,  $RMSEA = 0.073$ ,  $NNFI = 0.994$ ,  $IFI = 0.994$ ).

32  
33 In the adjusted burnout scale, we omitted the items from 15 to 17, 19, and 21 because  
34 of a low distinguishability in discriminant analysis. Cronbach's  $\alpha$  of this scale was  
35 increasing to 0.802. Besides, the adjusted burnout also has a good validity conducted  
36 by EFA and CFA ( $\chi^2/df = 8.395$ ,  $GFI = 0.993$ ,  $CFI = 0.994$ ,  $RMSEA = 0.076$ ,  $NNFI =$   
37  $0.994$ ,  $IFI = 0.994$ ).

38  
39 Similar in the adjusted turnover intention scale, item 27 was removed. The  
40 Cronbach's  $\alpha$  coefficient for the remaining 4 items ( $\alpha = 0.865$ ) indicated good internal  
41 consistency reliability. And the validity is acceptable ( $\chi^2/df = 6.889$ ,  $GFI = 0.948$ ,  $CFI =$   
42  $0.973$ ,  $RMSEA = 0.067$ ,  $NNFI = 0.969$ ,  $IFI = 0.973$ ).

### 43 **3.2.2 Correlation Analysis**

44  
45 Table 2 demonstrates the means, standard deviations, and correlation coefficients  
46 among three dimensions of job satisfaction, burnout, and turnover intention. As is  
47  
48  
49  
50  
51  
52  
53  
54  
55  
56  
57  
58  
59  
60

1  
2  
3 indicated that job satisfaction has both a significant negative relation with turnover  
4 intention ( $r = -0.414, P < 0.001$ ) and job burnout ( $r = -0.387, P < 0.001$ ). Job burnout  
5 showed a significant positive correlation with turnover intention ( $r = 0.797, P < 0.001$ ).  
6  
7

### 8 **3.2.3 Structural Equation Model**

9  
10 As can be seen in Figure 2 and Table 3, three latent variables in the model were  
11 significantly intercorrelated. The standardized path coefficient of path a (Job burnout  
12  $\rightarrow$  Satisfaction), b (Satisfaction  $\rightarrow$  Turnover intention), and c' (Job burnout  $\rightarrow$  Turnover  
13 intention) was respectively -0.409 (C.R. = -14.298,  $P < 0.001$ ), -0.116 (C.R. = -6.023,  
14  $P < 0.001$ ), and 0.845 (C.R. = 34.055,  $P < 0.001$ ). Higher standardized path coefficients  
15 suggest stronger correlations, with values over 0.200 considered very correlated. Taken  
16 path a as an example, it means that for each one standard deviation decreases in the job  
17 burnout, the change in satisfaction will increase by 0.409 standard deviation. The  
18 mediating effect of satisfaction was significant ( $P < 0.001$ ) with the path coefficient of  
19 0.047, making up 5.32% of the total effect (proportion =  $a \times b/c$ ,  $0.409 \times 0.116/0.892$   
20 = 0.053). The hypothetical model yields satisfactory values ( $GFI = 0.947, CFI = 0.975,$   
21  $RMSEA = 0.067, NNFI = 0.971, IFI = 0.975$ ), indicating credible data fit.  
22  
23

24 Variables such as age, education, income, etc. were introduced in the model to further  
25 research on the influences. Figure 3 illustrates the standardized path coefficient between  
26 each variable. Educational level, monthly income, and hire form showed a direct ( $r =$   
27 0.084, -0.037, 0.048 respectively) and indirect ( $r = -0.008, -0.018, -0.015$  respectively)  
28 effect on turnover intention. Also, age and night shift could affect turnover intention  
29 through job burnout with the standard path coefficient of -0.111 and 0.062. This model  
30 also showed a good fit to the data:  $GFI = 0.947, CFI = 0.971, RMSEA = 0.054, NNFI$   
31 = 0.963,  $IFI = 0.971$ .  
32  
33

34 To further deal with the stability of the model, a multiple-group analysis was  
35 conducted between physicians and nurses. Table 4 summarizes the testing for invariant  
36 factorial structure between physicians and nurses. The  $P$  values of the model of  
37 measurement weights and structural weights were separately 0.35 and 0.39, confirming  
38 the stability. Although  $P$  values were lower than 0.05 in the model of structural  
39 covariances, structural residuals, and measurement residuals, incredibly small  
40 variations were presented in indices of fit (all variations change  $< 0.05$ ). Therefore, the  
41 model can be regarded as stable in physicians and nurses.  
42  
43  
44  
45  
46  
47  
48  
49  
50  
51  
52  
53  
54  
55  
56  
57  
58  
59  
60

## 4 Discussion

This study was conducted to investigate the mediating effect of job satisfaction in the relationship between job burnout and turnover intention among primary medical staff in Huangpi District where the medical resources and clinical ability represent the averaged level in China. Through it, we confirmed the direct influence of job burnout and satisfaction drew on the turnover intention and the mediating effect of satisfaction. Our study additionally demonstrated that the prevalence rate of job burnout and turnover intention was respectively 18.69% and 26.04%. The results are quite consistent with previous researches in China [26,27].

In line with earlier studies, our results recognized that job burnout positively predicted turnover intention with an explanatory power of 94.73% [28,29]. For job burnout and its four latent measures, “no personal accomplishment”, “indifference”, and “anxious and fretful” show a strong correlation with burnout except for “a heavy work”. It is generally believed that burnout is intrinsically related to work factors and secondly to personality factors [30]. Hence, hospital managers must think about the role conflict and the way to solve emotional exhaustion and reduced personalized accomplishment. Our results also found that satisfaction could directly or indirectly affect turnover intention with a relatively limited effect. This finding helps to illuminate the relations between burnout, satisfaction, and turnover that were not apparent before, as most previous studies focused on satisfaction’s direct impact on turnover instead of a mediator [31,32]. Seen from the partial mediating effect of satisfaction, job burnout, to a very small degree, would increase the turnover tendency by reducing the satisfaction levels. That is to say, the fundamental reason for turnover tendency is job burnout while only 5.32% is related to low satisfaction. Therefore, the improvement of working conditions, welfares, advanced-learning opportunities, and reward mechanisms is worthy of concern but limited effect. The effective ways to solve this problem are to understand how burnout generates, focus on staff’s physical and mental changes, and do in science.

Apart from it, the turnover intention was noted to be affected by age, education level, monthly income, hire form, and night shift directly or through the mediators of satisfaction and burnout in our study. This influence shows no difference between physicians and nurses. Primary healthcare institutions generally play an essential role in medical providing and safeguarding among the broadest masses of people. In past

1  
2  
3 decades, the medical quality and service standard in primary medical institutions was  
4 continually enhanced with the in-depth development of national medical and health  
5 system reform. But most of the basic healthcare staff in China still encounter low  
6 salaries, less independence, insufficient social support, and few promotion prospects,  
7 which could lead to job burnout, unsatisfaction even turnover [33,34]. To fully utilize  
8 health resources and to improve the healthcare system's overall social impacts,  
9 governments and concerned departments should emphasize more attention to optimize  
10 medical resources allocation [35]. Under market economy conditions, public hospital  
11 managers should also establish and consummate hospital operation and management  
12 systems. As an occupation with high risk, pressure, and skill, healthcare staffs deserve  
13 a high payment. However, there is a huge income gap between China and developed  
14 countries [36]. The average monthly salary of Chinese health workers in 2017 was  
15 about 6669 RMB (approximately \$ 969.54) [37]. It is necessary to adopt a reasonable  
16 mechanism of performance incentive and financial management, to regulate and  
17 optimize nigh-shift works, and to set up a good academic atmosphere at the same time.  
18 Besides, more focuses need to raise on healthcare providers' psychological states,  
19 especially those youth with high educational background and academic qualification.  
20 In this way, the employee's motivation and enthusiasm could be improved to some  
21 extent.  
22  
23  
24  
25  
26  
27  
28  
29  
30  
31  
32  
33  
34  
35

36 Although this study contributes to the knowledge base of the turnover intention  
37 related to job burnout and satisfaction, it does have several limitations. First, causal  
38 relationships among turnover, burnout, and satisfaction should be cautiously interpreted  
39 as this is a cross-sectional study. Second, despite the credible reliability and validity,  
40 the scales we used were adjusted based on the existing general scales. Hence, it needs  
41 to be tested and replicated with additional researches. Third, other potential predictors  
42 such as work stress, social support, and mental health were not captured in our  
43 questionnaire. We will continue this study in the future to overcome the shortages.  
44  
45  
46  
47  
48  
49

## 50 **5 Conclusion**

51 The current findings indicate a positive association between job burnout and turnover  
52 intention, while a negative relation between job burnout and satisfaction, as well as  
53 satisfaction and turnover intention. Also, satisfaction can be regarded as a mediator  
54 between job burnout and turnover intention, whose partial mediating effect is 5.32%.  
55 Age, education level, monthly income, hire form, and night shift also influence the  
56  
57  
58  
59  
60



turnover intention, hence, relative measures can be taken to promote enthusiasm and satisfaction thus decreasing the turnover rate.

## Abbreviations

**MSQ:** Minnesota Satisfaction Questionnaire, **JSS:** Job Satisfaction Survey, **JDI:** Job Descriptive Index, **MBI-GS:** Maslach Burnout Inventory-General Survey, **EFA:** exploratory factor analysis, **CFA:** confirmatory factor analysis, **SEM:** structural equation modeling, **GFI:** the goodness of fit index, **CFI:** the comparative fit index, **RMSEA:** the root mean square error of approximation, **NNFI:** the non-normed fit index, **IFI:** the incremental fit index.

## Figure legends

Figure 1. Hypothesized model of burnout, satisfaction, and turnover intention

Figure 2. The structural equation modeling for the hypothetical model

Figure 3. The structural equation modeling after introducing demographic characteristic

## Acknowledgements

Here we are thankful to all the healthcare staff participated in this study. We are also grateful to all the investigators for collecting and calculating data.

## Contributors

Conceived and designed this paper: Li Ran. Wrote this paper: Li Ran. Calculated data: Li Ran, Xuyu Chen, Shuzhen Peng, and Feng Zheng. Performed the study and collected data: Xuyu Chen and Li Ran. Provided with analysis tools: Professor Xiaodong Tan. Mended and approved the final version: Professor Xiaodong Tan and Ruihua Duan.

## Funding

This research did not receive any specific grant from funding agencies in the public, commercial, or not-for-profit sectors.

## Ethics approval and consent to participate

Ethical approval for this study was granted by the Research Ethics Boards of Wuhan University (No.2018YF0080). Informed consent was obtained from all survey participants.

## Competing interests

The authors declare that they have no competing interests.

1  
2  
3 **Patient consent for publication**  
4

5 Not required.  
6

7 **Data sharing statement**  
8

9 Data may be made available by contacting the corresponding author.  
10  
11  
12  
13  
14  
15  
16  
17  
18  
19  
20  
21  
22  
23  
24  
25  
26  
27  
28  
29  
30  
31  
32  
33  
34  
35  
36  
37  
38  
39  
40  
41  
42  
43  
44  
45  
46  
47  
48  
49  
50  
51  
52  
53  
54  
55  
56  
57  
58  
59  
60

For peer review only

**References:**

- [1] D. Feng, S. Su, Y. Yang, J. Xia, Y. Su, "Job satisfaction mediates subjective social status and turnover intention among Chinese nurses," *Nursing & Health Sciences*, vol. 19, no. 3, pp. 388, 2017.
- [2] M. Marć, A. Bartosiewicz, J. Burzyńska, Z. Chmiel, P. Januszewicz, "A nursing shortage – a prospect of global and local policies," *INTERNATIONAL NURSING REVIEW*, vol. 66, no. 1, pp. 9-16, 2019.
- [3] E. Wang, "Requests for cesarean deliveries: The politics of labor pain and pain relief in Shanghai, China," *SOCIAL SCIENCE & MEDICINE*, vol. 173, pp. 1-8, 2017.
- [4] X. Li, J. Lu, S. Hu, et al, "The primary health-care system in China," *The Lancet*, vol. 390, no. 10112, pp. 2584-2594, 2017.
- [5] H. Li, B. Yuan, D. Wang, Q. Meng, "Motivating factors on performance of primary care workers in China: a systematic review and meta-analysis," *BMJ Open*, vol. 9, pp. e28619, 2019.
- [6] Q. Du, Y. Li, Z. Shi, "Application of performance management in the nurses overall quality of quantitative management," *Chinese Journal of Modern Nursing*, vol. 19, no. 27, pp. 3407-3409, 2013.
- [7] J. P. Meyer and N. J. Allen, "A Three-Component Model Conceptualization of Organizational Commitment," *HUMAN RESOURCE MANAGEMENT REVIEW*, vol. 78, no. 1, pp. 61-89, 2016.
- [8] Y. H. Lee and P. Chelladurai, "Emotional intelligence, emotional labor, coach burnout, job satisfaction, and turnover intention in sport leadership," *European Sport Management Quarterly*, vol. 18, no. 4, pp. 393-412, 2018.
- [9] A. Sousa-Poza and F. Henneberger, "Analyzing Job Mobility with Job Turnover Intentions: An International Comparative Study," *JOURNAL OF ECONOMIC ISSUES*, vol. 38, no. 1, pp. 113-137, 2004.
- [10] K. Amponsah-Tawiah, F. Annor, B. G. Arthur, "Linking commuting stress to job satisfaction and turnover intention: The mediating role of burnout," *Journal of Workplace Behavioral Health*, vol. 31, no. 2, pp. 104-123, 2016.
- [11] L. F. Yang, J. Y. Liu, Y. H. Liu, "Job burnout and turnover intention among nurses in China: the mediating effects of positive emotion," *Chinese Nursing Research*, vol. 5, no. 1, pp. 43-47, 2018.

- 1  
2  
3 [12] E. Hong and Y. S. Lee, "The mediating effect of emotional intelligence between  
4 emotional labour, job stress, burnout and nurses' turnover intention," *International*  
5 *Journal of Nursing Practice*, vol. 22, no. 6, pp. 625-632, 2016.  
6  
7  
8 [13] H. L. Ye and P. Chelladurai, "Emotional intelligence, emotional labor, coach  
9 burnout, job satisfaction, and turnover intention in sport leadership," *European*  
10 *Sport Management Quarterly*, vol., pp. 1-20, 2017.  
11  
12 [14] A. Pavlakis, V. Raftopoulos, M. Theodorou, "Burnout syndrome in Cypriot  
13 physiotherapists: a national survey," *BMC HEALTH SERVICES RESEARCH*, vol.  
14 10, no. 1, pp. 1-8, 2010.  
15  
16 [15] A. M. Pines, "Marriage burnout: A new conceptual framework for working with  
17 couples.," *Psychotherapy in Private Practice*, vol. 5, no. 2, pp. 31-44, 1987.  
18  
19 [16] H. Kroll, T. Macaulay, M. Jesse, "A preliminary survey examining predictors of  
20 burnout in pain medicine physicians in the United States," *Pain Physician*, vol. 19,  
21 no. 5, pp. E689, 2016.  
22  
23 [17] C. A. Wong and H. K. S. Laschinger, "The Influence of Frontline Manager Job  
24 Strain on Burnout, Commitment and Turnover Intention: A Cross-sectional Study,"  
25 *INTERNATIONAL JOURNAL OF NURSING STUDIES*, vol. 52, no. 12, pp. 1824-  
26 1833, 2015.  
27  
28 [18] A. C. C. Lu and D. Gursoy, "Impact of Job Burnout on Satisfaction and Turnover  
29 Intention: Do Generational Differences Matter?" *Journal of Hospitality & Tourism*  
30 *Research*, vol. 40, no. 2, pp. 210-235, 2016.  
31  
32 [19] H. Samadi Miarkolaei and H. Samadi Miarkolaei, "An investigation on relationship  
33 between employees ' job satisfaction and organizational commitment,"  
34 *Management Science Letters*, vol. 4, no. 4, pp. 669-678, 2014.  
35  
36 [20] T. Aldrees, S. Al-Eissa, M. Badri, A. Aljuhayman, M. Zamakhshary, "Physician  
37 job satisfaction in Saudi Arabia: insights from a tertiary hospital survey," *ANNALS*  
38 *OF SAUDI MEDICINE*, vol. 35, no. 3, pp. 210, 2015.  
39  
40 [21] D. J. Weiss, R. V. Dawis, G. W. England, "Manual for the Minnesota Satisfaction  
41 Question," *Minnesota Studies in Vocational Rehabilitation*, vol. 22, pp. 1967.  
42  
43 [22] T. Andreas and S. Pavlos, "Validity and reliability of the Greek translation of the  
44 Job Satisfaction Survey (JSS)," *Bmc Psychology*, vol. 6, no. 1, pp. 27, 2018.  
45  
46 [23] S. Lopes, M. J. Chambel, F. Castanheira, F. Oliveira-Cruz, "Measuring job  
47 satisfaction in Portuguese military sergeants and officers: Validation of the Job  
48  
49  
50  
51  
52  
53  
54  
55  
56  
57  
58  
59  
60

- 1  
2  
3 Descriptive Index and the Job in General scale.," *MILITARY PSYCHOLOGY*, vol.  
4 27, no. 1, pp. 52-63, 2015.
- 5  
6  
7 [24]N. Schutte, S. Toppinen, R. Kalimo, W. Schaufeli, "The factorial validity of the  
8 Maslach Burnout Inventory - General Survey (MBI - GS) across occupational  
9 groups and nations," *Journal of Occupational & Organizational Psychology*, vol.  
10 73, no. 1, pp. 53-66, 2011.
- 11  
12  
13 [25]C. F. C. Bothma and G. Roodt, "The validation of the turnover intention scale,"  
14 *South African Journal of Human Resource Management*, vol., pp.2013.
- 15  
16  
17 [26]Y. Gan, H. Jiang, L. Li, et al, "Prevalence of burnout and associated factors among  
18 general practitioners in Hubei, China: a cross-sectional study," *BMC PUBLIC*  
19 *HEALTH*, vol. 19, no. 1, pp. 1607, 2019.
- 20  
21  
22 [27]Y. Mao, H. Rongxin, J. Liu, N. Zhang, B. Zhu, "Turnover intention of primary  
23 health workers in China: a systematic review," *The Lancet*, vol. 392, pp. S17, 2018.
- 24  
25  
26 [28]L. F. Yang, J. Y. Liu, Y. H. Liu, "Job burnout and turnover intention among nurses  
27 in China:the mediating effects of positive emotion," *Chinese Nursing Research*,  
28 vol. 5, no. 1, pp. 43-47, 2018.
- 29  
30  
31 [29]K. Amponsah-Tawiah, F. Annor, B. G. Arthur, "Linking commuting stress to job  
32 satisfaction and turnover intention: The mediating role of burnout," *Journal of*  
33 *Workplace Behavioral Health*, vol. 31, no. 2, pp. 104-123, 2016.
- 34  
35  
36 [30]T. Lubbadeh, "JOB BURNOUT: A GENERAL LITERATURE REVIEW,"  
37 *International Review of Management and Marketing*, vol. 10, pp. 7-15, 2020.
- 38  
39  
40 [31]B. Coomber and K. Louise Barriball, "Impact of job satisfaction components on  
41 intent to leave and turnover for hospital-based nurses: A review of the research  
42 literature," *INTERNATIONAL JOURNAL OF NURSING STUDIES*, vol. 44, no. 2,  
43 pp. 297-314, 2007.
- 44  
45  
46 [32]I. Chen, R. Brown, B. J. Bowers, W. Chang, "Work-to-family conflict as a mediator  
47 of the relationship between job satisfaction and turnover intention," *JOURNAL OF*  
48 *ADVANCED NURSING*, vol. 71, no. 10, pp. 2350-2363, 2015.
- 49  
50  
51 [33]X. D. Zhou, L. Li, T. Hesketh, "Health system reform in rural China: Voices of  
52 healthworkers and service-users," *SOCIAL SCIENCE & MEDICINE*, vol. 117, no.  
53 1982, pp. 134-141, 2014.
- 54  
55  
56 [34]H. Li and G. Y. Yin, "Discussion on the human resource management of public  
57 hospitals under the implementation of the new medical reform," *China Medical*  
58  
59  
60

1  
2  
3 *Herald*, vol. 9, no. 5, pp. 161-163, 2012.

4  
5 [35]E. Yaylali, P. G. Farnham, K. L. Schneider, et al, "From Theory to Practice:  
6 Implementation of a Resource Allocation Model in Health Departments," *Journal*  
7 *of Public Health Management & Practice Jphmp*, vol. 22, no. 6, pp. 567, 2016.

8  
9  
10 [36]J. Li, R. H. Feng, Y. Cui, M. Li, Y. Mao, X. Wang, "Comparison and Enlightenment  
11 on Health Staff , Income in Typical Countries under Different Economic  
12 Development," *Chinese Health Economics*, vol. 32, no. 1, pp. 91-93, 2013.

13  
14  
15 [37]J. You, "Research on the Current Situation and Improvement Strategy of Medical  
16 Personnel Salary Level in China," *Chinese Health Economics*, vol. 37, no. 8, pp.  
17 17-21, 2018.  
18  
19  
20  
21  
22  
23  
24  
25  
26  
27  
28  
29  
30  
31  
32  
33  
34  
35  
36  
37  
38  
39  
40  
41  
42  
43  
44  
45  
46  
47  
48  
49  
50  
51  
52  
53  
54  
55  
56  
57  
58  
59  
60

Table 1. Description of the respondents (n=1279)

| Variables                          | N (%)        | Satisfaction        |          | Job Burnout         |          | Turnover Intention  |          |
|------------------------------------|--------------|---------------------|----------|---------------------|----------|---------------------|----------|
|                                    |              | Prevalence rate (%) | $\chi^2$ | Prevalence rate (%) | $\chi^2$ | Prevalence rate (%) | $\chi^2$ |
| <b>Sex</b>                         |              |                     | 0.016    |                     | 3.233    |                     | 2.328    |
| male                               | 429 (33.50)  | 26.9                |          | 7.19                |          | 9.62                |          |
| female                             | 850 (66.50)  | 53.09               |          | 11.5                |          | 16.42               |          |
| <b>Age (years)</b>                 |              |                     | 13.853** |                     | 33.398** |                     | 55.014** |
| ≤30                                | 380 (29.71)  | 23.31               |          | 7.74                |          | 10.48               |          |
| 31-40                              | 366 (28.62)  | 21.5                |          | 5.79                |          | 8.99                |          |
| 41-50                              | 436 (34.09)  | 28.46               |          | 4.85                |          | 5.94                |          |
| ≥51                                | 97 (7.58)    | 6.72                |          | 0.31                |          | 0.63                |          |
| <b>Occupation</b>                  |              |                     | 2.562    |                     | 3.045    |                     | 3.698    |
| physician                          | 557 (43.55)  | 34.4                |          | 8.29                |          | 12.28               |          |
| nurse                              | 535 (41.83)  | 34.09               |          | 7.27                |          | 10.63               |          |
| specialists in laboratory medicine | 89 (6.96)    | 5.71                |          | 1.72                |          | 1.41                |          |
| public health physician            | 65 (5.08)    | 3.83                |          | 0.86                |          | 1.17                |          |
| pharmacist                         | 33 (2.55)    | 1.95                |          | 0.55                |          | 0.55                |          |
| <b>Educational level</b>           |              |                     | 4.146    |                     | 7.692    |                     | 23.072** |
| junior school and below            | 16 (1.25)    | 0.94                |          | 0.31                |          | 0.39                |          |
| high school/technical school       | 182 (14.23)  | 11.73               |          | 1.8                 |          | 1.88                |          |
| junior college degree              | 474 (37.06)  | 30.34               |          | 6.57                |          | 9.23                |          |
| undergraduate degree and above     | 607 (47.46)  | 36.98               |          | 10.01               |          | 14.54               |          |
| <b>Marital status</b>              |              |                     | 8.618    |                     | 13.308*  |                     | 26.538** |
| married                            | 1012 (79.12) | 64.12               |          | 13.29               |          | 18.22               |          |
| unmarried                          | 227 (17.75)  | 13.76               |          | 4.77                |          | 6.96                |          |
| divorced/Widowed                   | 40 (3.13)    | 2.11                |          | 0.63                |          | 0.86                |          |

|                                  |             |       |          |       |          |       |          |
|----------------------------------|-------------|-------|----------|-------|----------|-------|----------|
| <b>Technical post title</b>      |             |       | 8.8      |       | 7.039    |       | 4.691    |
| no title                         | 286 (22.36) | 18.45 |          | 4.53  |          | 6.25  |          |
| junior title                     | 598 (46.76) | 36.75 |          | 9.23  |          | 12.9  |          |
| intermediate title               | 288 (22.52) | 17.36 |          | 4.07  |          | 5.16  |          |
| senior title                     | 107 (8.36)  | 7.43  |          | 0.86  |          | 1.73  |          |
| <b>Monthly income (RMB)</b>      |             |       | 16.713** |       | 12.166*  |       | 19.817** |
| ≤2000                            | 71 (5.55)   | 3.99  |          | 1.25  |          | 2.19  |          |
| 2001-3000                        | 339 (26.51) | 19.55 |          | 6.18  |          | 8.61  |          |
| 3001-4000                        | 467 (36.51) | 30.18 |          | 6.25  |          | 8.05  |          |
| 4001-5000                        | 266 (20.80) | 17.51 |          | 2.74  |          | 4.69  |          |
| ≥5001                            | 136 (10.63) | 8.76  |          | 2.27  |          | 2.5   |          |
| <b>Hire from</b>                 |             |       | 5.467    |       | 9.631*   |       | 19.637** |
| personnel agent staff            | 171 (13.37) | 52.15 |          | 10.63 |          | 14.78 |          |
| permanent staff                  | 825 (64.50) | 9.93  |          | 3.45  |          | 5.08  |          |
| contract staff                   | 173 (13.53) | 10.87 |          | 2.58  |          | 3.29  |          |
| temporary staff                  | 110 (8.60)  | 7.04  |          | 2.03  |          | 2.89  |          |
| <b>Working time (hours/week)</b> |             |       | 30.865** |       | 34.103** |       | 37.055** |
| ≤30                              | 15 (1.17)   | 0.78  |          | 0.39  |          | 0.47  |          |
| 31-40                            | 629 (49.18) | 41.91 |          | 6.25  |          | 9.38  |          |
| 41-50                            | 427 (33.39) | 26.19 |          | 7.35  |          | 9.93  |          |
| ≥51                              | 208 (16.26) | 11.11 |          | 4.69  |          | 6.25  |          |
| <b>Working years</b>             |             |       | 13.485** |       | 26.683** |       | 44.637** |
| 1-5                              | 326 (25.49) | 20.17 |          | 6.57  |          | 8.99  |          |
| 6-10                             | 202 (15.79) | 11.57 |          | 3.21  |          | 5.39  |          |
| 11-15                            | 115 (8.99)  | 7.04  |          | 1.95  |          | 2.51  |          |
| 16-20                            | 201 (15.72) | 12.28 |          | 3.05  |          | 3.68  |          |
| ≥21                              | 435 (34.01) | 28.93 |          | 3.91  |          | 5.47  |          |
| <b>Night shift</b>               |             |       | 3.406    |       | 18.827** |       | 17.374** |
| 0                                | 769 (60.13) | 49.02 |          | 9.07  |          | 13.21 |          |



1  
2  
3  
4  
5  
6  
7  
8  
9  
10  
11  
12  
13  
14  
15  
16  
17  
18  
19  
20  
21  
22  
23  
24  
25  
26  
27  
28  
29  
30  
31  
32  
33  
34  
35  
36  
37  
38  
39  
40  
41  
42  
43  
44  
45  
46

|              |                   |              |          |              |          |              |          |
|--------------|-------------------|--------------|----------|--------------|----------|--------------|----------|
| 1-3          | 471 (36.83)       | 28.46        |          | 8.6          |          | 11.65        |          |
| >3           | 39 (3.04)         | 2.51         |          | 1.02         |          | 1.18         |          |
| <b>Total</b> | <b>1279 (100)</b> | <b>79.99</b> | <b>—</b> | <b>18.69</b> | <b>—</b> | <b>26.04</b> | <b>—</b> |

Notes: \*  $P < 0.05$ , \*\*  $P < 0.01$

For peer review only

Table 2. Pearson correlation among job satisfaction, burnout, and turnover intention of primary healthcare workers

|                                                    | <b>M</b>     | <b>SD</b>    | <b>Job Satisfaction</b> | <b>Job Burnout</b> | <b>Turnover Intention</b> |
|----------------------------------------------------|--------------|--------------|-------------------------|--------------------|---------------------------|
| <b>Job Satisfaction</b>                            | <b>23.06</b> | <b>5.377</b> | <b>1.000</b>            | <b>-0.387</b>      | <b>-0.414</b>             |
| Working environment                                | 4.08         | 0.921        | 0.882                   | -0.298             | -0.299                    |
| Welfare                                            | 3.63         | 1.093        | 0.902                   | -0.356             | -0.401                    |
| Prospect of my job                                 | 3.84         | 0.963        | 0.911                   | -0.370             | -0.403                    |
| Training and learning opportunities                | 3.89         | 0.960        | 0.889                   | -0.342             | -0.366                    |
| Income distribution                                | 3.71         | 1.046        | 0.917                   | -0.350             | -0.393                    |
| Management system and business process             | 3.91         | 0.941        | 0.908                   | -0.386             | -0.384                    |
| <b>Job Burnout</b>                                 | <b>10.87</b> | <b>4.392</b> | <b>-0.387</b>           | <b>1.000</b>       | <b>0.797</b>              |
| My work is heavy                                   | 3.42         | 1.008        | -0.134                  | 0.365              | 0.325                     |
| I can't find personal accomplishment in my job     | 2.10         | 0.990        | -0.319                  | 0.889              | 0.679                     |
| I'm indifference of my job                         | 2.02         | 0.996        | -0.352                  | 0.911              | 0.737                     |
| I feel anxious and fretful                         | 2.16         | 1.006        | -0.373                  | 0.884              | 0.752                     |
| <b>Turnover Intention</b>                          | <b>8.97</b>  | <b>3.614</b> | <b>-0.414</b>           | <b>0.797</b>       | <b>1.000</b>              |
| I once thought to leave my current organization    | 2.24         | 1.104        | -0.430                  | 0.765              | 0.881                     |
| I shall likely seek a new job within the next year | 1.86         | 0.869        | -0.297                  | 0.763              | 0.841                     |
| I shall accept a new job if I have a chance        | 2.45         | 1.207        | -0.403                  | 0.652              | 0.881                     |
| I can find a good job                              | 2.43         | 1.076        | -0.231                  | 0.543              | 0.788                     |

Notes: All  $P_s < 0.01$ . M- mean value; SD- standard deviation

Table 3. The standard effects in the hypothetical model

| Endogenous variables | Exogenous variables | Estimate | C.R.    | Direct effect ( <i>P</i> ) | Indirect effect ( <i>P</i> ) | Total effect ( <i>P</i> ) |
|----------------------|---------------------|----------|---------|----------------------------|------------------------------|---------------------------|
| Turnover intention   | Burnout             | 0.845    | 34.055  | 0.845 (< 0.001)            | 0.047 (< 0.001)              | 0.892 (< 0.001)           |
|                      | Satisfaction        | -0.116   | -6.023  | -0.116 (< 0.001)           | ---                          | -0.116 (< 0.001)          |
| Satisfaction         | Burnout             | -0.409   | -14.298 | -0.409 (< 0.001)           | ---                          | -0.409 (< 0.001)          |

Notes: C.R.- critical ratios

For peer review only

Table 4. Testing for invariant factorial structure of a measuring instrument

| <b>Model</b>           | <b>delta-<math>x^2</math></b> | <b>delta-df</b> | <b><i>P</i></b> | <b>delta-<math>x^2</math>/<br/>df</b> | <b>delta-GFI</b> | <b>delta-AGFI</b> | <b>delta-NFI</b> | <b>delta-RFI</b> | <b>delta-IFI</b> | <b>delta-TLI</b> |
|------------------------|-------------------------------|-----------------|-----------------|---------------------------------------|------------------|-------------------|------------------|------------------|------------------|------------------|
| Measurement weights    | 12.207                        | 11              | 0.35            | 0                                     | 0.003            | -0.001            | 0.002            | 0                | 0.002            | 0                |
| Structural weights     | 23.296                        | 22              | 0.39            | -0.001                                | 0.005            | -0.002            | 0.003            | 0                | 0.003            | 0                |
| Structural covariances | 95.617                        | 36              | < 0.05          | -0.007                                | 0.003            | -0.006            | 0.001            | -0.003           | 0.001            | -0.003           |
| Structural residuals   | 98.133                        | 39              | < 0.05          | -0.007                                | 0.003            | -0.006            | 0.002            | -0.003           | 0.001            | -0.003           |
| Measurement residuals  | 196.600                       | 53              | < 0.05          | -0.015                                | -0.003           | -0.012            | -0.002           | -0.008           | -0.002           | -0.008           |

1  
2  
3  
4  
5  
6  
7  
8  
9  
10  
11  
12  
13  
14  
15  
16  
17  
18  
19  
20  
21  
22  
23  
24  
25  
26  
27  
28  
29  
30  
31  
32  
33  
34  
35  
36  
37  
38  
39  
40  
41  
42  
43  
44  
45  
46  
47  
48  
49  
50  
51  
52  
53  
54  
55  
56  
57  
58  
59  
60

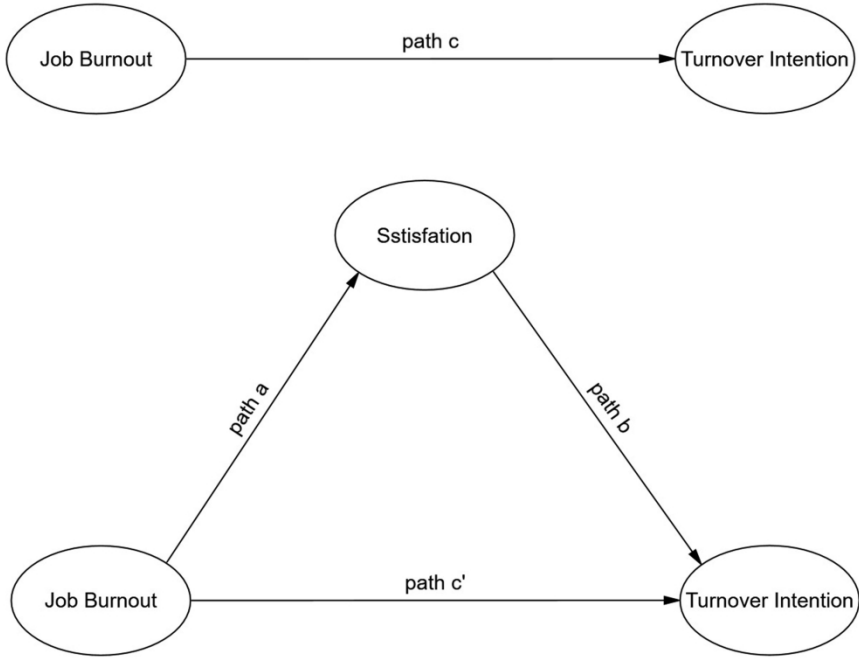

Figure 1. Hypothesized model of burnout, satisfaction, and turnover intention

370x370mm (300 x 300 DPI)



Figure 2. The structural equation modeling for the hypothetical model

370x370mm (300 x 300 DPI)

1  
2  
3  
4  
5  
6  
7  
8  
9  
10  
11  
12  
13  
14  
15  
16  
17  
18  
19  
20  
21  
22  
23  
24  
25  
26  
27  
28  
29  
30  
31  
32  
33  
34  
35  
36  
37  
38  
39  
40  
41  
42  
43  
44  
45  
46  
47  
48  
49  
50  
51  
52  
53  
54  
55  
56  
57  
58  
59  
60



Figure 3. The structural equation modeling after introducing demographic characteristic

370x370mm (300 x 300 DPI)

Dear medical staff,

Attention, please! We are students at Wuhan University. To realize the job burnout, job satisfaction, and turnover intention of medical staff, and provide a reference for administration, we sincerely invite you to conduct a questionnaire survey. This research will not harm your health and will not affect your current work. All your information will be treated in strict confidence and kept by the investigator. There are 41 questions in the questionnaire. Please answer the questions based on real conditions.

Thank you for your active participation again!

Q1 Would you like to participate in this survey?      yes       no

If yes, please fill in the following question. If no, the investigation ends.

Q2 Hospital Name: \_\_\_\_\_

Q3 Gender:    male     female

Q4 Age: \_\_\_\_\_ years

Q5 Educational level:    Junior school and below     High school/Technical school   
                                         Junior college degree     Undergraduate degree and above

Q6 Marital status:    Married     Unmarried     Divorced/Widowed

Q7 Occupation:    Physician     Nurse     Specialists in laboratory medicine   
                                         Public health physician     Pharmacist

Q8 Technical post title:    No title     Junior title   
                                         Intermediate title     Senior title

Q9 Monthly income (RMB):    ≤2000     2001-3000     3001-4000   
                                         4001-5000     ≥5001

Q10 Hire from:    Personnel agent staff     Permanent staff   
                                         Contract staff     Temporary staff

Q11 Working time (hours per week): \_\_\_\_\_

Q12 Working years: \_\_\_\_\_

Q13 Night shift (per week):    0     1-3     >3

#### About job satisfaction:

Q14 I feel comfortable about the working environment (office environment, virescence, light, ventilation, et.): **[item 1]**

Very dissatisfied     Dissatisfied     Average     Satisfied     Very satisfied

Q15 Sufficient technical equipment (professional information inquiry resources, instruments, etc.) for work use: **[item 2]**

Very dissatisfied     Dissatisfied     Average     Satisfied     Very satisfied

Q16 Harmonious interpersonal relationship (between superiors and subordinates): **[item 3]**

Very dissatisfied     Dissatisfied     Average     Satisfied     Very satisfied

Q17 Good cooperation between different departments: **[item 4]**

Very dissatisfied     Dissatisfied     Average     Satisfied     Very satisfied

Q18 The atmosphere is good: **[item 5]**

Very dissatisfied     Dissatisfied     Average     Satisfied     Very satisfied

Q19 The leadership is good: **[item 6]**



- 1  
2  
3           Very dissatisfied  Dissatisfied  Average  Satisfied  Very satisfied
- 4 Q20 I am satisfied with current income level: [item 7]
- 5           Very dissatisfied  Dissatisfied  Average  Satisfied  Very satisfied
- 6 Q21 I am satisfied with the welfare: [item 8]
- 7           Very dissatisfied  Dissatisfied  Average  Satisfied  Very satisfied
- 8 Q22 I am satisfied with the prospect of my job: [item 9]
- 9           Very dissatisfied  Dissatisfied  Average  Satisfied  Very satisfied
- 10 Q23 I am satisfied with the training and learning opportunities offered (frequency, form,  
11 and content): [item 10]
- 12           Very dissatisfied  Dissatisfied  Average  Satisfied  Very satisfied
- 13 Q24 The income distribution is reasonable: [item 11]
- 14           Very dissatisfied  Dissatisfied  Average  Satisfied  Very satisfied
- 15 Q25 The performance reward mechanism is reasonable: [item 12]
- 16           Very dissatisfied  Dissatisfied  Average  Satisfied  Very satisfied
- 17 Q26 The performance reward system has achieved good results: [item 13]
- 18           Very dissatisfied  Dissatisfied  Average  Satisfied  Very satisfied
- 19 Q27 The management system and business process are good: [item 14]
- 20           Very dissatisfied  Dissatisfied  Average  Satisfied  Very satisfied
- 21  
22  
23  
24  
25  
26  
27

### About job burnout:

- 28 Q28 I'm interested in my job: [item 15]
- 29           Strongly disagree  Disagree  Average  Agree  Strongly agree
- 30 Q29 I'm fit for this job: [item 16]
- 31           Strongly disagree  Disagree  Average  Agree  Strongly agree
- 32 Q30 I think my work is challenging: [item 17]
- 33           Strongly disagree  Disagree  Average  Agree  Strongly agree
- 34 Q31 My work is heavy: [item 18]
- 35           Strongly disagree  Disagree  Average  Agree  Strongly agree
- 36 Q32 I think my work is meaningless: [item 19]
- 37           Strongly disagree  Disagree  Average  Agree  Strongly agree
- 38 Q33 I can't find personal accomplishment in my job: [item 20]
- 39           Strongly disagree  Disagree  Average  Agree  Strongly agree
- 40 Q34 I feel exhausted: [item 21]
- 41           Strongly disagree  Disagree  Average  Agree  Strongly agree
- 42 Q35 I'm indifference of my job: [item 22]
- 43           Strongly disagree  Disagree  Average  Agree  Strongly agree
- 44 Q36 I feel anxious and fretful: [item 23]
- 45           Strongly disagree  Disagree  Average  Agree  Strongly agree
- 46  
47  
48  
49  
50  
51  
52  
53

### About turnover intention:

- 54 Q37 I once thought to leave my current organization: [item 24]
- 55           Strongly disagree  Disagree  Average  Agree  Strongly agree
- 56 Q38 I shall likely seek a new job within the next year: [item 25]
- 57           Strongly disagree  Disagree  Average  Agree  Strongly agree
- 58  
59  
60

1  
2  
3 Q39 I shall accept a new job if I have a chance: [item 26]

4 Strongly disagree  Disagree  Average  Agree  Strongly agree

5  
6 Q40 I consider that the employment situation is favorable: [item 27]

7 Strongly disagree  Disagree  Average  Agree  Strongly agree

8  
9 Q41 I can find a good job: [item 28]

10 Strongly disagree  Disagree  Average  Agree  Strongly agree

11  
12 **Thank you for your participation!**

13  
14  
15 Survey date: \_\_\_\_Y/\_\_\_\_M/\_\_\_\_D

16 Questionnaire coding: \_\_\_\_\_  
17  
18  
19  
20  
21  
22  
23  
24  
25  
26  
27  
28  
29  
30  
31  
32  
33  
34  
35  
36  
37  
38  
39  
40  
41  
42  
43  
44  
45  
46  
47  
48  
49  
50  
51  
52  
53  
54  
55  
56  
57  
58  
59  
60

## STROBE Statement—checklist of items that should be included in reports of observational studies

|                              | Item No | Recommendation                                                                                                                                                                                                                                                                                                                                                                                                                                                         | Page No |
|------------------------------|---------|------------------------------------------------------------------------------------------------------------------------------------------------------------------------------------------------------------------------------------------------------------------------------------------------------------------------------------------------------------------------------------------------------------------------------------------------------------------------|---------|
| <b>Title and abstract</b>    | 1       | (a) Indicate the study's design with a commonly used term in the title or the abstract                                                                                                                                                                                                                                                                                                                                                                                 | 2       |
|                              |         | (b) Provide in the abstract an informative and balanced summary of what was done and what was found                                                                                                                                                                                                                                                                                                                                                                    | 2       |
| <b>Introduction</b>          |         |                                                                                                                                                                                                                                                                                                                                                                                                                                                                        |         |
| Background/rationale         | 2       | Explain the scientific background and rationale for the investigation being reported                                                                                                                                                                                                                                                                                                                                                                                   | 4-6     |
| Objectives                   | 3       | State specific objectives, including any prespecified hypotheses                                                                                                                                                                                                                                                                                                                                                                                                       | 5       |
| <b>Methods</b>               |         |                                                                                                                                                                                                                                                                                                                                                                                                                                                                        |         |
| Study design                 | 4       | Present key elements of study design early in the paper                                                                                                                                                                                                                                                                                                                                                                                                                | 6       |
| Setting                      | 5       | Describe the setting, locations, and relevant dates, including periods of recruitment, exposure, follow-up, and data collection                                                                                                                                                                                                                                                                                                                                        | 6       |
| Participants                 | 6       | (a) <i>Cohort study</i> —Give the eligibility criteria, and the sources and methods of selection of participants. Describe methods of follow-up<br><i>Case-control study</i> —Give the eligibility criteria, and the sources and methods of case ascertainment and control selection. Give the rationale for the choice of cases and controls<br><i>Cross-sectional study</i> —Give the eligibility criteria, and the sources and methods of selection of participants | 6       |
|                              |         | (b) <i>Cohort study</i> —For matched studies, give matching criteria and number of exposed and unexposed<br><i>Case-control study</i> —For matched studies, give matching criteria and the number of controls per case                                                                                                                                                                                                                                                 | N/A     |
| Variables                    | 7       | Clearly define all outcomes, exposures, predictors, potential confounders, and effect modifiers. Give diagnostic criteria, if applicable                                                                                                                                                                                                                                                                                                                               | 6-7     |
| Data sources/<br>measurement | 8*      | For each variable of interest, give sources of data and details of methods of assessment (measurement). Describe comparability of assessment methods if there is more than one group                                                                                                                                                                                                                                                                                   | 6-7     |
| Bias                         | 9       | Describe any efforts to address potential sources of bias                                                                                                                                                                                                                                                                                                                                                                                                              | N/A     |
| Study size                   | 10      | Explain how the study size was arrived at                                                                                                                                                                                                                                                                                                                                                                                                                              | N/A     |
| Quantitative variables       | 11      | Explain how quantitative variables were handled in the analyses. If applicable, describe which groupings were chosen and why                                                                                                                                                                                                                                                                                                                                           | N/A     |
| Statistical methods          | 12      | (a) Describe all statistical methods, including those used to control for confounding                                                                                                                                                                                                                                                                                                                                                                                  | 7-8     |
|                              |         | (b) Describe any methods used to examine subgroups and interactions                                                                                                                                                                                                                                                                                                                                                                                                    | 7-8     |
|                              |         | (c) Explain how missing data were addressed                                                                                                                                                                                                                                                                                                                                                                                                                            | N/A     |
|                              |         | (d) <i>Cohort study</i> —If applicable, explain how loss to follow-up was addressed<br><i>Case-control study</i> —If applicable, explain how matching of cases and controls was addressed<br><i>Cross-sectional study</i> —If applicable, describe analytical methods taking account of sampling strategy                                                                                                                                                              | N/A     |
|                              |         | (e) Describe any sensitivity analyses                                                                                                                                                                                                                                                                                                                                                                                                                                  | N/A     |

Continued on next page

| <b>Results</b>           |     |                                                                                                                                                                                                              |      |
|--------------------------|-----|--------------------------------------------------------------------------------------------------------------------------------------------------------------------------------------------------------------|------|
| Participants             | 13* | (a) Report numbers of individuals at each stage of study—eg numbers potentially eligible, examined for eligibility, confirmed eligible, included in the study, completing follow-up, and analysed            | 6, 8 |
|                          |     | (b) Give reasons for non-participation at each stage                                                                                                                                                         | N/A  |
|                          |     | (c) Consider use of a flow diagram                                                                                                                                                                           |      |
| Descriptive data         | 14* | (a) Give characteristics of study participants (eg demographic, clinical, social) and information on exposures and potential confounders                                                                     | 8    |
|                          |     | (b) Indicate number of participants with missing data for each variable of interest                                                                                                                          | N/A  |
|                          |     | (c) <i>Cohort study</i> —Summarise follow-up time (eg, average and total amount)                                                                                                                             | N/A  |
| Outcome data             | 15* | <i>Cohort study</i> —Report numbers of outcome events or summary measures over time                                                                                                                          | N/A  |
|                          |     | <i>Case-control study</i> —Report numbers in each exposure category, or summary measures of exposure                                                                                                         | N/A  |
|                          |     | <i>Cross-sectional study</i> —Report numbers of outcome events or summary measures                                                                                                                           | 8    |
| Main results             | 16  | (a) Give unadjusted estimates and, if applicable, confounder-adjusted estimates and their precision (eg, 95% confidence interval). Make clear which confounders were adjusted for and why they were included | 9    |
|                          |     | (b) Report category boundaries when continuous variables were categorized                                                                                                                                    | N/A  |
|                          |     | (c) If relevant, consider translating estimates of relative risk into absolute risk for a meaningful time period                                                                                             | N/A  |
| Other analyses           | 17  | Report other analyses done—eg analyses of subgroups and interactions, and sensitivity analyses                                                                                                               | N/A  |
| <b>Discussion</b>        |     |                                                                                                                                                                                                              |      |
| Key results              | 18  | Summarise key results with reference to study objectives                                                                                                                                                     | 8-10 |
| Limitations              | 19  | Discuss limitations of the study, taking into account sources of potential bias or imprecision. Discuss both direction and magnitude of any potential bias                                                   | 12   |
| Interpretation           | 20  | Give a cautious overall interpretation of results considering objectives, limitations, multiplicity of analyses, results from similar studies, and other relevant evidence                                   | 12   |
| Generalisability         | 21  | Discuss the generalisability (external validity) of the study results                                                                                                                                        | 11   |
| <b>Other information</b> |     |                                                                                                                                                                                                              |      |
| Funding                  | 22  | Give the source of funding and the role of the funders for the present study and, if applicable, for the original study on which the present article is based                                                | N/A  |

\*Give information separately for cases and controls in case-control studies and, if applicable, for exposed and unexposed groups in cohort and cross-sectional studies.

**Note:** An Explanation and Elaboration article discusses each checklist item and gives methodological background and published examples of transparent reporting. The STROBE checklist is best used in conjunction with this article (freely available on the Web sites of PLoS Medicine at <http://www.plosmedicine.org/>, Annals of Internal Medicine at <http://www.annals.org/>, and Epidemiology at <http://www.epidem.com/>). Information on the STROBE Initiative is available at [www.strobe-statement.org](http://www.strobe-statement.org).
