# Supplementary material for: Job burnout and turnover intention among Chinese primary healthcare staff: the mediating effect of satisfaction
Source: PubMed Central journal article supplement — BMJ Open. 2020 Oct 7;10(10):e036702. doi: 10.1136/bmjopen-2019-036702 (PMC7542935; doi:10.1136/bmjopen-2019-036702), 2020-10-07
Supplement: bmjopen-2019-036702supp001.pdf [file bmjopen-2019-036702supp001.pdf]

Dear medical staff,

Attention, please! We are students at Wuhan University. To realize the job burnout, job satisfaction, and turnover intention of medical staff, and provide a reference for administration, we sincerely invite you to conduct a questionnaire survey. This research will not harm your health and will not affect your current work. All your information will be treated in strict confidence and kept by the investigator. There are 41 questions in the questionnaire. Please answer the questions based on real conditions.

Thank you for your active participation again!

Q1 Would you like to participate in this survey?    yes     no

If yes, please fill in the following question. If no, the investigation ends.

Q2 Hospital Name: \_\_\_\_\_

Q3 Gender:    male     female

Q4 Age: \_\_\_\_\_ years

Q5 Educational level:    Junior school and below     High school/Technical school   
                                         Junior college degree     Undergraduate degree and above

Q6 Marital status:    Married     Unmarried     Divorced/Widowed

Q7 Occupation:    Physician     Nurse     Specialists in laboratory medicine   
                                         Public health physician     Pharmacist

Q8 Technical post title:    No title     Junior title   
                                         Intermediate title     Senior title

Q9 Monthly income (RMB):    ≤2000     2001-3000     3001-4000   
                                         4001-5000     ≥5001

Q10 Hire from:    Personnel agent staff     Permanent staff   
                                         Contract staff     Temporary staff

Q11 Working time (hours per week): \_\_\_\_\_

Q12 Working years: \_\_\_\_\_

Q13 Night shift (per week):    0     1-3     >3

#### **About job satisfaction:**

Q14 I feel comfortable about the working environment (office environment, virescence, light, ventilation, et.): [\[item 1\]](#)

Very dissatisfied     Dissatisfied     Average     Satisfied     Very satisfied

Q15 Sufficient technical equipment (professional information inquiry resources, instruments, etc.) for work use: [\[item 2\]](#)

Very dissatisfied     Dissatisfied     Average     Satisfied     Very satisfied

Q16 Harmonious interpersonal relationship (between superiors and subordinates): [\[item 3\]](#)

Very dissatisfied     Dissatisfied     Average     Satisfied     Very satisfied

Q17 Good cooperation between different departments: [\[item 4\]](#)

Very dissatisfied     Dissatisfied     Average     Satisfied     Very satisfied

Q18 The atmosphere is good: [\[item 5\]](#)

Very dissatisfied     Dissatisfied     Average     Satisfied     Very satisfied

Q19 The leadership is good: [\[item 6\]](#)

- Very dissatisfied  Dissatisfied  Average  Satisfied  Very satisfied
- Q20 I am satisfied with current income level: [\[item 7\]](#)
- Very dissatisfied  Dissatisfied  Average  Satisfied  Very satisfied
- Q21 I am satisfied with the welfare: [\[item 8\]](#)
- Very dissatisfied  Dissatisfied  Average  Satisfied  Very satisfied
- Q22 I am satisfied with the prospect of my job: [\[item 9\]](#)
- Very dissatisfied  Dissatisfied  Average  Satisfied  Very satisfied
- Q23 I am satisfied with the training and learning opportunities offered (frequency, form, and content): [\[item 10\]](#)
- Very dissatisfied  Dissatisfied  Average  Satisfied  Very satisfied
- Q24 The income distribution is reasonable: [\[item 11\]](#)
- Very dissatisfied  Dissatisfied  Average  Satisfied  Very satisfied
- Q25 The performance reward mechanism is reasonable: [\[item 12\]](#)
- Very dissatisfied  Dissatisfied  Average  Satisfied  Very satisfied
- Q26 The performance reward system has achieved good results: [\[item 13\]](#)
- Very dissatisfied  Dissatisfied  Average  Satisfied  Very satisfied
- Q27 The management system and business process are good: [\[item 14\]](#)
- Very dissatisfied  Dissatisfied  Average  Satisfied  Very satisfied

**About job burnout:**

- Q28 I'm interested in my job: [\[item 15\]](#)
- Strongly disagree  Disagree  Average  Agree  Strongly agree
- Q29 I'm fit for this job: [\[item 16\]](#)
- Strongly disagree  Disagree  Average  Agree  Strongly agree
- Q30 I think my work is challenging: [\[item 17\]](#)
- Strongly disagree  Disagree  Average  Agree  Strongly agree
- Q31 My work is heavy: [\[item 18\]](#)
- Strongly disagree  Disagree  Average  Agree  Strongly agree
- Q32 I think my work is meaningless: [\[item 19\]](#)
- Strongly disagree  Disagree  Average  Agree  Strongly agree
- Q33 I can't find personal accomplishment in my job: [\[item 20\]](#)
- Strongly disagree  Disagree  Average  Agree  Strongly agree
- Q34 I feel exhausted: [\[item 21\]](#)
- Strongly disagree  Disagree  Average  Agree  Strongly agree
- Q35 I'm indifference of my job: [\[item 22\]](#)
- Strongly disagree  Disagree  Average  Agree  Strongly agree
- Q36 I feel anxious and fretful: [\[item 23\]](#)
- Strongly disagree  Disagree  Average  Agree  Strongly agree

**About turnover intention:**

- Q37 I once thought to leave my current organization: [\[item 24\]](#)
- Strongly disagree  Disagree  Average  Agree  Strongly agree
- Q38 I shall likely seek a new job within the next year: [\[item 25\]](#)
- Strongly disagree  Disagree  Average  Agree  Strongly agree

Q39 I shall accept a new job if I have a chance: [item 26]

Strongly disagree  Disagree  Average  Agree  Strongly agree

Q40 I consider that the employment situation is favorable: [item 27]

Strongly disagree  Disagree  Average  Agree  Strongly agree

Q41 I can find a good job: [item 28]

Strongly disagree  Disagree  Average  Agree  Strongly agree

**Thank you for your participation!**

Survey date: \_\_\_\_Y/\_\_\_\_M/\_\_\_\_D

Questionnaire coding: \_\_\_\_\_
